# Supplementary material for: Genomic and ecological approaches to identify the Bifidobacterium breve prototype of the healthy human gut microbiota
Source: Front Microbiol. 2024 Feb 15;15:1349391. doi: 10.3389/fmicb.2024.1349391 (PMC10902438; doi:10.3389/fmicb.2024.1349391)
Supplement: Supplementary file 1 [file Table_1.XLSX]

## Sheet: Table S1
Table S1. Metadata of 4,019 human fecal samples of healthy adults.
Run	BioProject	Organism	Material	Country	Continent	Host Age	Host sex	Assay Type	Library Source	Platform	Sequencing Instrument	Library Layout
DRR127488	PRJDB4176	human gut metagenome	feces	Japan	Asia	72	male	WGS	METAGENOMIC	ILLUMINA	Illumina HiSeq 2500	PAIRED
DRR127524	PRJDB4176	human gut metagenome	feces	Japan	Asia	73	male	WGS	METAGENOMIC	ILLUMINA	Illumina HiSeq 2500	PAIRED
DRR127532	PRJDB4176	human gut metagenome	feces	Japan	Asia	59	female	WGS	METAGENOMIC	ILLUMINA	Illumina HiSeq 2500	PAIRED
DRR127535	PRJDB4176	human gut metagenome	feces	Japan	Asia	64	male	WGS	METAGENOMIC	ILLUMINA	Illumina HiSeq 2500	PAIRED
DRR127537	PRJDB4176	human gut metagenome	feces	Japan	Asia	50	female	WGS	METAGENOMIC	ILLUMINA	Illumina HiSeq 2500	PAIRED
DRR127546	PRJDB4176	human gut metagenome	feces	Japan	Asia	67	female	WGS	METAGENOMIC	ILLUMINA	Illumina HiSeq 2500	PAIRED
DRR127552	PRJDB4176	human gut metagenome	feces	Japan	Asia	45	male	WGS	METAGENOMIC	ILLUMINA	Illumina HiSeq 2500	PAIRED
DRR127583	PRJDB4176	human gut metagenome	feces	Japan	Asia	65	female	WGS	METAGENOMIC	ILLUMINA	Illumina HiSeq 2500	PAIRED
DRR127588	PRJDB4176	human gut metagenome	feces	Japan	Asia	76	male	WGS	METAGENOMIC	ILLUMINA	Illumina HiSeq 2500	PAIRED
DRR127596	PRJDB4176	human gut metagenome	feces	Japan	Asia	76	female	WGS	METAGENOMIC	ILLUMINA	Illumina HiSeq 2500	PAIRED
DRR127597	PRJDB4176	human gut metagenome	feces	Japan	Asia	53	female	WGS	METAGENOMIC	ILLUMINA	Illumina HiSeq 2500	PAIRED
DRR127613	PRJDB4176	human gut metagenome	feces	Japan	Asia	75	female	WGS	METAGENOMIC	ILLUMINA	Illumina HiSeq 2500	PAIRED
DRR127616	PRJDB4176	human gut metagenome	feces	Japan	Asia	78	male	WGS	METAGENOMIC	ILLUMINA	Illumina HiSeq 2500	PAIRED
DRR127619	PRJDB4176	human gut metagenome	feces	Japan	Asia	45	male	WGS	METAGENOMIC	ILLUMINA	Illumina HiSeq 2500	PAIRED
DRR127628	PRJDB4176	human gut metagenome	feces	Japan	Asia	76	male	WGS	METAGENOMIC	ILLUMINA	Illumina HiSeq 2500	PAIRED
DRR127634	PRJDB4176	human gut metagenome	feces	Japan	Asia	42	female	WGS	METAGENOMIC	ILLUMINA	Illumina HiSeq 2500	PAIRED
DRR127649	PRJDB4176	human gut metagenome	feces	Japan	Asia	49	female	WGS	METAGENOMIC	ILLUMINA	Illumina HiSeq 2500	PAIRED
DRR127672	PRJDB4176	human gut metagenome	feces	Japan	Asia	42	male	WGS	METAGENOMIC	ILLUMINA	Illumina HiSeq 2500	PAIRED
DRR127683	PRJDB4176	human gut metagenome	feces	Japan	Asia	40	male	WGS	METAGENOMIC	ILLUMINA	Illumina HiSeq 2500	PAIRED
DRR127692	PRJDB4176	human gut metagenome	feces	Japan	Asia	76	male	WGS	METAGENOMIC	ILLUMINA	Illumina HiSeq 2500	PAIRED
DRR127704	PRJDB4176	human gut metagenome	feces	Japan	Asia	49	female	WGS	METAGENOMIC	ILLUMINA	Illumina HiSeq 2500	PAIRED
DRR127707	PRJDB4176	human gut metagenome	feces	Japan	Asia	63	male	WGS	METAGENOMIC	ILLUMINA	Illumina HiSeq 2500	PAIRED
DRR127713	PRJDB4176	human gut metagenome	feces	Japan	Asia	49	male	WGS	METAGENOMIC	ILLUMINA	Illumina HiSeq 2500	PAIRED
DRR127721	PRJDB4176	human gut metagenome	feces	Japan	Asia	51	male	WGS	METAGENOMIC	ILLUMINA	Illumina HiSeq 2500	PAIRED
DRR127724	PRJDB4176	human gut metagenome	feces	Japan	Asia	66	female	WGS	METAGENOMIC	ILLUMINA	Illumina HiSeq 2500	PAIRED
DRR127728	PRJDB4176	human gut metagenome	feces	Japan	Asia	71	female	WGS	METAGENOMIC	ILLUMINA	Illumina HiSeq 2500	PAIRED
DRR127731	PRJDB4176	human gut metagenome	feces	Japan	Asia	66	male	WGS	METAGENOMIC	ILLUMINA	Illumina HiSeq 2500	PAIRED
DRR127736	PRJDB4176	human gut metagenome	feces	Japan	Asia	64	female	WGS	METAGENOMIC	ILLUMINA	Illumina HiSeq 2500	PAIRED
DRR127737	PRJDB4176	human gut metagenome	feces	Japan	Asia	77	female	WGS	METAGENOMIC	ILLUMINA	Illumina HiSeq 2500	PAIRED
DRR127748	PRJDB4176	human gut metagenome	feces	Japan	Asia	44	male	WGS	METAGENOMIC	ILLUMINA	Illumina HiSeq 2500	PAIRED
DRR127751	PRJDB4176	human gut metagenome	feces	Japan	Asia	74	male	WGS	METAGENOMIC	ILLUMINA	Illumina HiSeq 2500	PAIRED
DRR127752	PRJDB4176	human gut metagenome	feces	Japan	Asia	70	male	WGS	METAGENOMIC	ILLUMINA	Illumina HiSeq 2500	PAIRED
DRR127755	PRJDB4176	human gut metagenome	feces	Japan	Asia	70	male	WGS	METAGENOMIC	ILLUMINA	Illumina HiSeq 2500	PAIRED
DRR127756	PRJDB4176	human gut metagenome	feces	Japan	Asia	75	male	WGS	METAGENOMIC	ILLUMINA	Illumina HiSeq 2500	PAIRED
DRR127762	PRJDB4176	human gut metagenome	feces	Japan	Asia	76	male	WGS	METAGENOMIC	ILLUMINA	Illumina HiSeq 2500	PAIRED
DRR127763	PRJDB4176	human gut metagenome	feces	Japan	Asia	76	male	WGS	METAGENOMIC	ILLUMINA	Illumina HiSeq 2500	PAIRED
DRR127776	PRJDB4176	human gut metagenome	feces	Japan	Asia	73	female	WGS	METAGENOMIC	ILLUMINA	Illumina HiSeq 2500	PAIRED
DRR127777	PRJDB4176	human gut metagenome	feces	Japan	Asia	77	female	WGS	METAGENOMIC	ILLUMINA	Illumina HiSeq 2500	PAIRED
DRR162775	PRJDB4176	human gut metagenome	feces	Japan	Asia	65	male	WGS	METAGENOMIC	ILLUMINA	Illumina HiSeq 2500	PAIRED
DRR162776	PRJDB4176	human gut metagenome	feces	Japan	Asia	66	female	WGS	METAGENOMIC	ILLUMINA	Illumina HiSeq 2500	PAIRED
ERR1655206	PRJEB15388	human gut metagenome	feces	Ireland	Europe	‒	‒	WGS	METAGENOMIC	ILLUMINA	Illumina HiSeq 2500	PAIRED
ERR1655207	PRJEB15388	human gut metagenome	feces	Ireland	Europe	‒	‒	WGS	METAGENOMIC	ILLUMINA	Illumina HiSeq 2500	PAIRED
ERR1655208	PRJEB15388	human gut metagenome	feces	Ireland	Europe	‒	‒	WGS	METAGENOMIC	ILLUMINA	Illumina HiSeq 2500	PAIRED
ERR1655209	PRJEB15388	human gut metagenome	feces	Ireland	Europe	‒	‒	WGS	METAGENOMIC	ILLUMINA	Illumina HiSeq 2500	PAIRED
ERR1655210	PRJEB15388	human gut metagenome	feces	Ireland	Europe	‒	‒	WGS	METAGENOMIC	ILLUMINA	Illumina HiSeq 2500	PAIRED
ERR1655211	PRJEB15388	human gut metagenome	feces	Ireland	Europe	‒	‒	WGS	METAGENOMIC	ILLUMINA	Illumina HiSeq 2500	PAIRED
ERR1655212	PRJEB15388	human gut metagenome	feces	Ireland	Europe	‒	‒	WGS	METAGENOMIC	ILLUMINA	Illumina HiSeq 2500	PAIRED
ERR1655213	PRJEB15388	human gut metagenome	feces	Ireland	Europe	‒	‒	WGS	METAGENOMIC	ILLUMINA	Illumina HiSeq 2500	PAIRED
ERR1655214	PRJEB15388	human gut metagenome	feces	Ireland	Europe	‒	‒	WGS	METAGENOMIC	ILLUMINA	Illumina HiSeq 2500	PAIRED
ERR1655215	PRJEB15388	human gut metagenome	feces	Ireland	Europe	‒	‒	WGS	METAGENOMIC	ILLUMINA	Illumina HiSeq 2500	PAIRED
ERR1655216	PRJEB15388	human gut metagenome	feces	Ireland	Europe	‒	‒	WGS	METAGENOMIC	ILLUMINA	Illumina HiSeq 2500	PAIRED
ERR1655217	PRJEB15388	human gut metagenome	feces	Ireland	Europe	‒	‒	WGS	METAGENOMIC	ILLUMINA	Illumina HiSeq 2500	PAIRED
ERR1655218	PRJEB15388	human gut metagenome	feces	Ireland	Europe	‒	‒	WGS	METAGENOMIC	ILLUMINA	Illumina HiSeq 2500	PAIRED
ERR1655219	PRJEB15388	human gut metagenome	feces	Ireland	Europe	‒	‒	WGS	METAGENOMIC	ILLUMINA	Illumina HiSeq 2500	PAIRED
ERR1655220	PRJEB15388	human gut metagenome	feces	Ireland	Europe	‒	‒	WGS	METAGENOMIC	ILLUMINA	Illumina HiSeq 2500	PAIRED
ERR1655221	PRJEB15388	human gut metagenome	feces	Ireland	Europe	‒	‒	WGS	METAGENOMIC	ILLUMINA	Illumina HiSeq 2500	PAIRED
ERR1655222	PRJEB15388	human gut metagenome	feces	Ireland	Europe	‒	‒	WGS	METAGENOMIC	ILLUMINA	Illumina HiSeq 2500	PAIRED
ERR1655223	PRJEB15388	human gut metagenome	feces	Ireland	Europe	‒	‒	WGS	METAGENOMIC	ILLUMINA	Illumina HiSeq 2500	PAIRED
ERR1655224	PRJEB15388	human gut metagenome	feces	Ireland	Europe	‒	‒	WGS	METAGENOMIC	ILLUMINA	Illumina HiSeq 2500	PAIRED
ERR1655225	PRJEB15388	human gut metagenome	feces	Ireland	Europe	‒	‒	WGS	METAGENOMIC	ILLUMINA	Illumina HiSeq 2500	PAIRED
ERR1655226	PRJEB15388	human gut metagenome	feces	Ireland	Europe	‒	‒	WGS	METAGENOMIC	ILLUMINA	Illumina HiSeq 2500	PAIRED
ERR1655227	PRJEB15388	human gut metagenome	feces	Ireland	Europe	‒	‒	WGS	METAGENOMIC	ILLUMINA	Illumina HiSeq 2500	PAIRED
ERR1655228	PRJEB15388	human gut metagenome	feces	Ireland	Europe	‒	‒	WGS	METAGENOMIC	ILLUMINA	Illumina HiSeq 2500	PAIRED
ERR1655229	PRJEB15388	human gut metagenome	feces	Ireland	Europe	‒	‒	WGS	METAGENOMIC	ILLUMINA	Illumina HiSeq 2500	PAIRED
ERR1655230	PRJEB15388	human gut metagenome	feces	Ireland	Europe	‒	‒	WGS	METAGENOMIC	ILLUMINA	Illumina HiSeq 2500	PAIRED
ERR1655231	PRJEB15388	human gut metagenome	feces	Ireland	Europe	‒	‒	WGS	METAGENOMIC	ILLUMINA	Illumina HiSeq 2500	PAIRED
ERR1655232	PRJEB15388	human gut metagenome	feces	Ireland	Europe	‒	‒	WGS	METAGENOMIC	ILLUMINA	Illumina HiSeq 2500	PAIRED
ERR1655233	PRJEB15388	human gut metagenome	feces	Ireland	Europe	‒	‒	WGS	METAGENOMIC	ILLUMINA	Illumina HiSeq 2500	PAIRED
ERR1655234	PRJEB15388	human gut metagenome	feces	Ireland	Europe	‒	‒	WGS	METAGENOMIC	ILLUMINA	Illumina HiSeq 2500	PAIRED
ERR1655235	PRJEB15388	human gut metagenome	feces	Ireland	Europe	‒	‒	WGS	METAGENOMIC	ILLUMINA	Illumina HiSeq 2500	PAIRED
ERR1655236	PRJEB15388	human gut metagenome	feces	Ireland	Europe	‒	‒	WGS	METAGENOMIC	ILLUMINA	Illumina HiSeq 2500	PAIRED
ERR1655237	PRJEB15388	human gut metagenome	feces	Ireland	Europe	‒	‒	WGS	METAGENOMIC	ILLUMINA	Illumina HiSeq 2500	PAIRED
ERR1655238	PRJEB15388	human gut metagenome	feces	Ireland	Europe	‒	‒	WGS	METAGENOMIC	ILLUMINA	Illumina HiSeq 2500	PAIRED
ERR1655239	PRJEB15388	human gut metagenome	feces	Ireland	Europe	‒	‒	WGS	METAGENOMIC	ILLUMINA	Illumina HiSeq 2500	PAIRED
ERR1655240	PRJEB15388	human gut metagenome	feces	Ireland	Europe	‒	‒	WGS	METAGENOMIC	ILLUMINA	Illumina HiSeq 2500	PAIRED
ERR1655241	PRJEB15388	human gut metagenome	feces	Ireland	Europe	‒	‒	WGS	METAGENOMIC	ILLUMINA	Illumina HiSeq 2500	PAIRED
ERR1655242	PRJEB15388	human gut metagenome	feces	Ireland	Europe	‒	‒	WGS	METAGENOMIC	ILLUMINA	Illumina HiSeq 2500	PAIRED
ERR1655243	PRJEB15388	human gut metagenome	feces	Ireland	Europe	‒	‒	WGS	METAGENOMIC	ILLUMINA	Illumina HiSeq 2500	PAIRED
ERR1655244	PRJEB15388	human gut metagenome	feces	Ireland	Europe	‒	‒	WGS	METAGENOMIC	ILLUMINA	Illumina HiSeq 2500	PAIRED
ERR1655245	PRJEB15388	human gut metagenome	feces	Ireland	Europe	‒	‒	WGS	METAGENOMIC	ILLUMINA	Illumina HiSeq 2500	PAIRED
ERR1655246	PRJEB15388	human gut metagenome	feces	Ireland	Europe	‒	‒	WGS	METAGENOMIC	ILLUMINA	Illumina HiSeq 2500	PAIRED
ERR1655247	PRJEB15388	human gut metagenome	feces	Ireland	Europe	‒	‒	WGS	METAGENOMIC	ILLUMINA	Illumina HiSeq 2500	PAIRED
ERR1655248	PRJEB15388	human gut metagenome	feces	Ireland	Europe	‒	‒	WGS	METAGENOMIC	ILLUMINA	Illumina HiSeq 2500	PAIRED
ERR1655249	PRJEB15388	human gut metagenome	feces	Ireland	Europe	‒	‒	WGS	METAGENOMIC	ILLUMINA	Illumina HiSeq 2500	PAIRED
ERR1655250	PRJEB15388	human gut metagenome	feces	Ireland	Europe	‒	‒	WGS	METAGENOMIC	ILLUMINA	Illumina HiSeq 2500	PAIRED
ERR1655251	PRJEB15388	human gut metagenome	feces	Ireland	Europe	‒	‒	WGS	METAGENOMIC	ILLUMINA	Illumina HiSeq 2500	PAIRED
ERR1655252	PRJEB15388	human gut metagenome	feces	Ireland	Europe	‒	‒	WGS	METAGENOMIC	ILLUMINA	Illumina HiSeq 2500	PAIRED
ERR1655253	PRJEB15388	human gut metagenome	feces	Ireland	Europe	‒	‒	WGS	METAGENOMIC	ILLUMINA	Illumina HiSeq 2500	PAIRED
ERR1655254	PRJEB15388	human gut metagenome	feces	Ireland	Europe	‒	‒	WGS	METAGENOMIC	ILLUMINA	Illumina HiSeq 2500	PAIRED
ERR1655255	PRJEB15388	human gut metagenome	feces	Ireland	Europe	‒	‒	WGS	METAGENOMIC	ILLUMINA	Illumina HiSeq 2500	PAIRED
ERR1655256	PRJEB15388	human gut metagenome	feces	Ireland	Europe	‒	‒	WGS	METAGENOMIC	ILLUMINA	Illumina HiSeq 2500	PAIRED
ERR1655257	PRJEB15388	human gut metagenome	feces	Ireland	Europe	‒	‒	WGS	METAGENOMIC	ILLUMINA	Illumina HiSeq 2500	PAIRED
ERR1655258	PRJEB15388	human gut metagenome	feces	Ireland	Europe	‒	‒	WGS	METAGENOMIC	ILLUMINA	Illumina HiSeq 2500	PAIRED
ERR1655259	PRJEB15388	human gut metagenome	feces	Ireland	Europe	‒	‒	WGS	METAGENOMIC	ILLUMINA	Illumina HiSeq 2500	PAIRED
ERR1655260	PRJEB15388	human gut metagenome	feces	Ireland	Europe	‒	‒	WGS	METAGENOMIC	ILLUMINA	Illumina HiSeq 2500	PAIRED
ERR1655261	PRJEB15388	human gut metagenome	feces	Ireland	Europe	‒	‒	WGS	METAGENOMIC	ILLUMINA	Illumina HiSeq 2500	PAIRED
ERR1655262	PRJEB15388	human gut metagenome	feces	Ireland	Europe	‒	‒	WGS	METAGENOMIC	ILLUMINA	Illumina HiSeq 2500	PAIRED
ERR1655263	PRJEB15388	human gut metagenome	feces	Ireland	Europe	‒	‒	WGS	METAGENOMIC	ILLUMINA	Illumina HiSeq 2500	PAIRED
ERR1655264	PRJEB15388	human gut metagenome	feces	Ireland	Europe	‒	‒	WGS	METAGENOMIC	ILLUMINA	Illumina HiSeq 2500	PAIRED
ERR1655265	PRJEB15388	human gut metagenome	feces	Ireland	Europe	‒	‒	WGS	METAGENOMIC	ILLUMINA	Illumina HiSeq 2500	PAIRED
ERR1655266	PRJEB15388	human gut metagenome	feces	Ireland	Europe	‒	‒	WGS	METAGENOMIC	ILLUMINA	Illumina HiSeq 2500	PAIRED
ERR1655267	PRJEB15388	human gut metagenome	feces	Ireland	Europe	‒	‒	WGS	METAGENOMIC	ILLUMINA	Illumina HiSeq 2500	PAIRED
ERR1655268	PRJEB15388	human gut metagenome	feces	Ireland	Europe	‒	‒	WGS	METAGENOMIC	ILLUMINA	Illumina HiSeq 2500	PAIRED
ERR1655269	PRJEB15388	human gut metagenome	feces	Ireland	Europe	‒	‒	WGS	METAGENOMIC	ILLUMINA	Illumina HiSeq 2500	PAIRED
ERR1655270	PRJEB15388	human gut metagenome	feces	Ireland	Europe	‒	‒	WGS	METAGENOMIC	ILLUMINA	Illumina HiSeq 2500	PAIRED
ERR1655271	PRJEB15388	human gut metagenome	feces	Ireland	Europe	‒	‒	WGS	METAGENOMIC	ILLUMINA	Illumina HiSeq 2500	PAIRED
ERR1655272	PRJEB15388	human gut metagenome	feces	Ireland	Europe	‒	‒	WGS	METAGENOMIC	ILLUMINA	Illumina HiSeq 2500	PAIRED
ERR1655273	PRJEB15388	human gut metagenome	feces	Ireland	Europe	‒	‒	WGS	METAGENOMIC	ILLUMINA	Illumina HiSeq 2500	PAIRED
ERR1655274	PRJEB15388	human gut metagenome	feces	Ireland	Europe	‒	‒	WGS	METAGENOMIC	ILLUMINA	Illumina HiSeq 2500	PAIRED
ERR1655275	PRJEB15388	human gut metagenome	feces	Ireland	Europe	‒	‒	WGS	METAGENOMIC	ILLUMINA	Illumina HiSeq 2500	PAIRED
ERR1655276	PRJEB15388	human gut metagenome	feces	Ireland	Europe	‒	‒	WGS	METAGENOMIC	ILLUMINA	Illumina HiSeq 2500	PAIRED
ERR1655277	PRJEB15388	human gut metagenome	feces	Ireland	Europe	‒	‒	WGS	METAGENOMIC	ILLUMINA	Illumina HiSeq 2500	PAIRED
ERR1655278	PRJEB15388	human gut metagenome	feces	Ireland	Europe	‒	‒	WGS	METAGENOMIC	ILLUMINA	Illumina HiSeq 2500	PAIRED
ERR1655279	PRJEB15388	human gut metagenome	feces	Ireland	Europe	‒	‒	WGS	METAGENOMIC	ILLUMINA	Illumina HiSeq 2500	PAIRED
ERR1655280	PRJEB15388	human gut metagenome	feces	Ireland	Europe	‒	‒	WGS	METAGENOMIC	ILLUMINA	Illumina HiSeq 2500	PAIRED
ERR1655281	PRJEB15388	human gut metagenome	feces	Ireland	Europe	‒	‒	WGS	METAGENOMIC	ILLUMINA	Illumina HiSeq 2500	PAIRED
ERR1655282	PRJEB15388	human gut metagenome	feces	Ireland	Europe	‒	‒	WGS	METAGENOMIC	ILLUMINA	Illumina HiSeq 2500	PAIRED
ERR1655283	PRJEB15388	human gut metagenome	feces	Ireland	Europe	‒	‒	WGS	METAGENOMIC	ILLUMINA	Illumina HiSeq 2500	PAIRED
ERR1655284	PRJEB15388	human gut metagenome	feces	Ireland	Europe	‒	‒	WGS	METAGENOMIC	ILLUMINA	Illumina HiSeq 2500	PAIRED
ERR1655285	PRJEB15388	human gut metagenome	feces	Ireland	Europe	‒	‒	WGS	METAGENOMIC	ILLUMINA	Illumina HiSeq 2500	PAIRED
ERR1655286	PRJEB15388	human gut metagenome	feces	Ireland	Europe	‒	‒	WGS	METAGENOMIC	ILLUMINA	Illumina HiSeq 2500	PAIRED
ERR1655287	PRJEB15388	human gut metagenome	feces	Ireland	Europe	‒	‒	WGS	METAGENOMIC	ILLUMINA	Illumina HiSeq 2500	PAIRED
ERR1655288	PRJEB15388	human gut metagenome	feces	Ireland	Europe	‒	‒	WGS	METAGENOMIC	ILLUMINA	Illumina HiSeq 2500	PAIRED
ERR1655289	PRJEB15388	human gut metagenome	feces	Ireland	Europe	‒	‒	WGS	METAGENOMIC	ILLUMINA	Illumina HiSeq 2500	PAIRED
ERR1655290	PRJEB15388	human gut metagenome	feces	Ireland	Europe	‒	‒	WGS	METAGENOMIC	ILLUMINA	Illumina HiSeq 2500	PAIRED
ERR1655291	PRJEB15388	human gut metagenome	feces	Ireland	Europe	‒	‒	WGS	METAGENOMIC	ILLUMINA	Illumina HiSeq 2500	PAIRED
ERR1912946	PRJEB17784	human gut metagenome	feces	Germany	Europe	‒	‒	WGS	METAGENOMIC	ILLUMINA	Illumina HiSeq 2500	PAIRED
ERR1912947	PRJEB17784	human gut metagenome	feces	Germany	Europe	‒	‒	WGS	METAGENOMIC	ILLUMINA	Illumina HiSeq 2500	PAIRED
ERR1912948	PRJEB17784	human gut metagenome	feces	Germany	Europe	‒	‒	WGS	METAGENOMIC	ILLUMINA	Illumina HiSeq 2500	PAIRED
ERR1912957	PRJEB17784	human gut metagenome	feces	Germany	Europe	‒	‒	WGS	METAGENOMIC	ILLUMINA	Illumina HiSeq 2500	PAIRED
ERR1912961	PRJEB17784	human gut metagenome	feces	Germany	Europe	‒	‒	WGS	METAGENOMIC	ILLUMINA	Illumina HiSeq 2500	PAIRED
ERR1912962	PRJEB17784	human gut metagenome	feces	Germany	Europe	‒	‒	WGS	METAGENOMIC	ILLUMINA	Illumina HiSeq 2500	PAIRED
ERR1912963	PRJEB17784	human gut metagenome	feces	Germany	Europe	‒	‒	WGS	METAGENOMIC	ILLUMINA	Illumina HiSeq 2500	PAIRED
ERR1912971	PRJEB17784	human gut metagenome	feces	Germany	Europe	‒	‒	WGS	METAGENOMIC	ILLUMINA	Illumina HiSeq 2500	PAIRED
ERR1912979	PRJEB17784	human gut metagenome	feces	Germany	Europe	‒	‒	WGS	METAGENOMIC	ILLUMINA	Illumina HiSeq 2500	PAIRED
ERR1912980	PRJEB17784	human gut metagenome	feces	Germany	Europe	‒	‒	WGS	METAGENOMIC	ILLUMINA	Illumina HiSeq 2500	PAIRED
ERR1912981	PRJEB17784	human gut metagenome	feces	Germany	Europe	‒	‒	WGS	METAGENOMIC	ILLUMINA	Illumina HiSeq 2500	PAIRED
ERR1912982	PRJEB17784	human gut metagenome	feces	Germany	Europe	‒	‒	WGS	METAGENOMIC	ILLUMINA	Illumina HiSeq 2500	PAIRED
ERR1912989	PRJEB17784	human gut metagenome	feces	Germany	Europe	‒	‒	WGS	METAGENOMIC	ILLUMINA	Illumina HiSeq 2500	PAIRED
ERR1912991	PRJEB17784	human gut metagenome	feces	Germany	Europe	‒	‒	WGS	METAGENOMIC	ILLUMINA	Illumina HiSeq 2500	PAIRED
ERR1912992	PRJEB17784	human gut metagenome	feces	Germany	Europe	‒	‒	WGS	METAGENOMIC	ILLUMINA	Illumina HiSeq 2500	PAIRED
ERR1912993	PRJEB17784	human gut metagenome	feces	Germany	Europe	‒	‒	WGS	METAGENOMIC	ILLUMINA	Illumina HiSeq 2500	PAIRED
ERR1913003	PRJEB17784	human gut metagenome	feces	Germany	Europe	‒	‒	WGS	METAGENOMIC	ILLUMINA	Illumina HiSeq 2500	PAIRED
ERR1913004	PRJEB17784	human gut metagenome	feces	Germany	Europe	‒	‒	WGS	METAGENOMIC	ILLUMINA	Illumina HiSeq 2500	PAIRED
ERR1913005	PRJEB17784	human gut metagenome	feces	Germany	Europe	‒	‒	WGS	METAGENOMIC	ILLUMINA	Illumina HiSeq 2500	PAIRED
ERR1913007	PRJEB17784	human gut metagenome	feces	Germany	Europe	‒	‒	WGS	METAGENOMIC	ILLUMINA	Illumina HiSeq 2500	PAIRED
ERR1913008	PRJEB17784	human gut metagenome	feces	Germany	Europe	‒	‒	WGS	METAGENOMIC	ILLUMINA	Illumina HiSeq 2500	PAIRED
ERR1913009	PRJEB17784	human gut metagenome	feces	Germany	Europe	‒	‒	WGS	METAGENOMIC	ILLUMINA	Illumina HiSeq 2500	PAIRED
ERR1913015	PRJEB17784	human gut metagenome	feces	Germany	Europe	‒	‒	WGS	METAGENOMIC	ILLUMINA	Illumina HiSeq 2500	PAIRED
ERR1913016	PRJEB17784	human gut metagenome	feces	Germany	Europe	‒	‒	WGS	METAGENOMIC	ILLUMINA	Illumina HiSeq 2500	PAIRED
ERR1913025	PRJEB17784	human gut metagenome	feces	Germany	Europe	‒	‒	WGS	METAGENOMIC	ILLUMINA	Illumina HiSeq 2500	PAIRED
ERR1913026	PRJEB17784	human gut metagenome	feces	Germany	Europe	‒	‒	WGS	METAGENOMIC	ILLUMINA	Illumina HiSeq 2500	PAIRED
ERR1913027	PRJEB17784	human gut metagenome	feces	Germany	Europe	‒	‒	WGS	METAGENOMIC	ILLUMINA	Illumina HiSeq 2500	PAIRED
ERR1913028	PRJEB17784	human gut metagenome	feces	Germany	Europe	‒	‒	WGS	METAGENOMIC	ILLUMINA	Illumina HiSeq 2500	PAIRED
ERR1913030	PRJEB17784	human gut metagenome	feces	Germany	Europe	‒	‒	WGS	METAGENOMIC	ILLUMINA	Illumina HiSeq 2500	PAIRED
ERR1913031	PRJEB17784	human gut metagenome	feces	Germany	Europe	‒	‒	WGS	METAGENOMIC	ILLUMINA	Illumina HiSeq 2500	PAIRED
ERR1913036	PRJEB17784	human gut metagenome	feces	Germany	Europe	‒	‒	WGS	METAGENOMIC	ILLUMINA	Illumina HiSeq 2500	PAIRED
ERR1913040	PRJEB17784	human gut metagenome	feces	Germany	Europe	‒	‒	WGS	METAGENOMIC	ILLUMINA	Illumina HiSeq 2500	PAIRED
ERR1913041	PRJEB17784	human gut metagenome	feces	Germany	Europe	‒	‒	WGS	METAGENOMIC	ILLUMINA	Illumina HiSeq 2500	PAIRED
ERR1913043	PRJEB17784	human gut metagenome	feces	Germany	Europe	‒	‒	WGS	METAGENOMIC	ILLUMINA	Illumina HiSeq 2500	PAIRED
ERR1913044	PRJEB17784	human gut metagenome	feces	Germany	Europe	‒	‒	WGS	METAGENOMIC	ILLUMINA	Illumina HiSeq 2500	PAIRED
ERR1913045	PRJEB17784	human gut metagenome	feces	Germany	Europe	‒	‒	WGS	METAGENOMIC	ILLUMINA	Illumina HiSeq 2500	PAIRED
ERR1913054	PRJEB17784	human gut metagenome	feces	Germany	Europe	‒	‒	WGS	METAGENOMIC	ILLUMINA	Illumina HiSeq 2500	PAIRED
ERR1913055	PRJEB17784	human gut metagenome	feces	Germany	Europe	‒	‒	WGS	METAGENOMIC	ILLUMINA	Illumina HiSeq 2500	PAIRED
ERR1913056	PRJEB17784	human gut metagenome	feces	Germany	Europe	‒	‒	WGS	METAGENOMIC	ILLUMINA	Illumina HiSeq 2500	PAIRED
ERR1913061	PRJEB17784	human gut metagenome	feces	Germany	Europe	‒	‒	WGS	METAGENOMIC	ILLUMINA	Illumina HiSeq 2500	PAIRED
ERR1913063	PRJEB17784	human gut metagenome	feces	Germany	Europe	‒	‒	WGS	METAGENOMIC	ILLUMINA	Illumina HiSeq 2500	PAIRED
ERR1913076	PRJEB17784	human gut metagenome	feces	Germany	Europe	‒	‒	WGS	METAGENOMIC	ILLUMINA	Illumina HiSeq 2500	PAIRED
ERR1913077	PRJEB17784	human gut metagenome	feces	Germany	Europe	‒	‒	WGS	METAGENOMIC	ILLUMINA	Illumina HiSeq 2500	PAIRED
ERR1913079	PRJEB17784	human gut metagenome	feces	Germany	Europe	‒	‒	WGS	METAGENOMIC	ILLUMINA	Illumina HiSeq 2500	PAIRED
ERR1913084	PRJEB17784	human gut metagenome	feces	Germany	Europe	‒	‒	WGS	METAGENOMIC	ILLUMINA	Illumina HiSeq 2500	PAIRED
ERR1913085	PRJEB17784	human gut metagenome	feces	Germany	Europe	‒	‒	WGS	METAGENOMIC	ILLUMINA	Illumina HiSeq 2500	PAIRED
ERR1913087	PRJEB17784	human gut metagenome	feces	Germany	Europe	‒	‒	WGS	METAGENOMIC	ILLUMINA	Illumina HiSeq 2500	PAIRED
ERR1913100	PRJEB17784	human gut metagenome	feces	Germany	Europe	‒	‒	WGS	METAGENOMIC	ILLUMINA	Illumina HiSeq 2500	PAIRED
ERR1913102	PRJEB17784	human gut metagenome	feces	Germany	Europe	‒	‒	WGS	METAGENOMIC	ILLUMINA	Illumina HiSeq 2500	PAIRED
ERR1913103	PRJEB17784	human gut metagenome	feces	Germany	Europe	‒	‒	WGS	METAGENOMIC	ILLUMINA	Illumina HiSeq 2500	PAIRED
ERR1913108	PRJEB17784	human gut metagenome	feces	Germany	Europe	‒	‒	WGS	METAGENOMIC	ILLUMINA	Illumina HiSeq 2500	PAIRED
ERR1913109	PRJEB17784	human gut metagenome	feces	Germany	Europe	‒	‒	WGS	METAGENOMIC	ILLUMINA	Illumina HiSeq 2500	PAIRED
ERR1913110	PRJEB17784	human gut metagenome	feces	Germany	Europe	‒	‒	WGS	METAGENOMIC	ILLUMINA	Illumina HiSeq 2500	PAIRED
ERR1913112	PRJEB17784	human gut metagenome	feces	Germany	Europe	‒	‒	WGS	METAGENOMIC	ILLUMINA	Illumina HiSeq 2500	PAIRED
ERR1913113	PRJEB17784	human gut metagenome	feces	Germany	Europe	‒	‒	WGS	METAGENOMIC	ILLUMINA	Illumina HiSeq 2500	PAIRED
ERR1913114	PRJEB17784	human gut metagenome	feces	Germany	Europe	‒	‒	WGS	METAGENOMIC	ILLUMINA	Illumina HiSeq 2500	PAIRED
ERR1913115	PRJEB17784	human gut metagenome	feces	Germany	Europe	‒	‒	WGS	METAGENOMIC	ILLUMINA	Illumina HiSeq 2500	PAIRED
ERR1913116	PRJEB17784	human gut metagenome	feces	Germany	Europe	‒	‒	WGS	METAGENOMIC	ILLUMINA	Illumina HiSeq 2500	PAIRED
ERR1913117	PRJEB17784	human gut metagenome	feces	Germany	Europe	‒	‒	WGS	METAGENOMIC	ILLUMINA	Illumina HiSeq 2500	PAIRED
ERR1913118	PRJEB17784	human gut metagenome	feces	Germany	Europe	‒	‒	WGS	METAGENOMIC	ILLUMINA	Illumina HiSeq 2500	PAIRED
ERR1913126	PRJEB17784	human gut metagenome	feces	Germany	Europe	‒	‒	WGS	METAGENOMIC	ILLUMINA	Illumina HiSeq 2500	PAIRED
ERR1913138	PRJEB17784	human gut metagenome	feces	Germany	Europe	‒	‒	WGS	METAGENOMIC	ILLUMINA	Illumina HiSeq 2500	SINGLE
ERR1913140	PRJEB17784	human gut metagenome	feces	Germany	Europe	‒	‒	WGS	METAGENOMIC	ILLUMINA	Illumina HiSeq 2500	SINGLE
ERR1913149	PRJEB17784	human gut metagenome	feces	Germany	Europe	‒	‒	WGS	METAGENOMIC	ILLUMINA	Illumina HiSeq 2500	SINGLE
ERR1913153	PRJEB17784	human gut metagenome	feces	Germany	Europe	‒	‒	WGS	METAGENOMIC	ILLUMINA	Illumina HiSeq 2500	SINGLE
ERR1913154	PRJEB17784	human gut metagenome	feces	Germany	Europe	‒	‒	WGS	METAGENOMIC	ILLUMINA	Illumina HiSeq 2500	SINGLE
ERR1913155	PRJEB17784	human gut metagenome	feces	Germany	Europe	‒	‒	WGS	METAGENOMIC	ILLUMINA	Illumina HiSeq 2500	SINGLE
ERR1913172	PRJEB17784	human gut metagenome	feces	Germany	Europe	‒	‒	WGS	METAGENOMIC	ILLUMINA	Illumina HiSeq 2500	SINGLE
ERR1913173	PRJEB17784	human gut metagenome	feces	Germany	Europe	‒	‒	WGS	METAGENOMIC	ILLUMINA	Illumina HiSeq 2500	SINGLE
ERR1913174	PRJEB17784	human gut metagenome	feces	Germany	Europe	‒	‒	WGS	METAGENOMIC	ILLUMINA	Illumina HiSeq 2500	SINGLE
ERR1913181	PRJEB17784	human gut metagenome	feces	Germany	Europe	‒	‒	WGS	METAGENOMIC	ILLUMINA	Illumina HiSeq 2500	SINGLE
ERR1913182	PRJEB17784	human gut metagenome	feces	Germany	Europe	‒	‒	WGS	METAGENOMIC	ILLUMINA	Illumina HiSeq 2500	SINGLE
ERR1913183	PRJEB17784	human gut metagenome	feces	Germany	Europe	‒	‒	WGS	METAGENOMIC	ILLUMINA	Illumina HiSeq 2500	SINGLE
ERR1913184	PRJEB17784	human gut metagenome	feces	Germany	Europe	‒	‒	WGS	METAGENOMIC	ILLUMINA	Illumina HiSeq 2500	SINGLE
ERR1913185	PRJEB17784	human gut metagenome	feces	Germany	Europe	‒	‒	WGS	METAGENOMIC	ILLUMINA	Illumina HiSeq 2500	SINGLE
ERR1913195	PRJEB17784	human gut metagenome	feces	Germany	Europe	‒	‒	WGS	METAGENOMIC	ILLUMINA	Illumina HiSeq 2500	SINGLE
ERR1913197	PRJEB17784	human gut metagenome	feces	Germany	Europe	‒	‒	WGS	METAGENOMIC	ILLUMINA	Illumina HiSeq 2500	SINGLE
ERR1913198	PRJEB17784	human gut metagenome	feces	Germany	Europe	‒	‒	WGS	METAGENOMIC	ILLUMINA	Illumina HiSeq 2500	SINGLE
ERR1913199	PRJEB17784	human gut metagenome	feces	Germany	Europe	‒	‒	WGS	METAGENOMIC	ILLUMINA	Illumina HiSeq 2500	SINGLE
ERR1913201	PRJEB17784	human gut metagenome	feces	Germany	Europe	‒	‒	WGS	METAGENOMIC	ILLUMINA	Illumina HiSeq 2500	SINGLE
ERR1913206	PRJEB17784	human gut metagenome	feces	Germany	Europe	‒	‒	WGS	METAGENOMIC	ILLUMINA	Illumina HiSeq 2500	SINGLE
ERR1913207	PRJEB17784	human gut metagenome	feces	Germany	Europe	‒	‒	WGS	METAGENOMIC	ILLUMINA	Illumina HiSeq 2500	SINGLE
ERR1913208	PRJEB17784	human gut metagenome	feces	Germany	Europe	‒	‒	WGS	METAGENOMIC	ILLUMINA	Illumina HiSeq 2500	SINGLE
ERR1913217	PRJEB17784	human gut metagenome	feces	Germany	Europe	‒	‒	WGS	METAGENOMIC	ILLUMINA	Illumina HiSeq 2500	SINGLE
ERR1913218	PRJEB17784	human gut metagenome	feces	Germany	Europe	‒	‒	WGS	METAGENOMIC	ILLUMINA	Illumina HiSeq 2500	SINGLE
ERR1913219	PRJEB17784	human gut metagenome	feces	Germany	Europe	‒	‒	WGS	METAGENOMIC	ILLUMINA	Illumina HiSeq 2500	SINGLE
ERR1913220	PRJEB17784	human gut metagenome	feces	Germany	Europe	‒	‒	WGS	METAGENOMIC	ILLUMINA	Illumina HiSeq 2500	SINGLE
ERR1913221	PRJEB17784	human gut metagenome	feces	Germany	Europe	‒	‒	WGS	METAGENOMIC	ILLUMINA	Illumina HiSeq 2500	SINGLE
ERR1913222	PRJEB17784	human gut metagenome	feces	Germany	Europe	‒	‒	WGS	METAGENOMIC	ILLUMINA	Illumina HiSeq 2500	SINGLE
ERR1913223	PRJEB17784	human gut metagenome	feces	Germany	Europe	‒	‒	WGS	METAGENOMIC	ILLUMINA	Illumina HiSeq 2500	SINGLE
ERR1913228	PRJEB17784	human gut metagenome	feces	Germany	Europe	‒	‒	WGS	METAGENOMIC	ILLUMINA	Illumina HiSeq 2500	SINGLE
ERR1913232	PRJEB17784	human gut metagenome	feces	Germany	Europe	‒	‒	WGS	METAGENOMIC	ILLUMINA	Illumina HiSeq 2500	SINGLE
ERR1913233	PRJEB17784	human gut metagenome	feces	Germany	Europe	‒	‒	WGS	METAGENOMIC	ILLUMINA	Illumina HiSeq 2500	SINGLE
ERR1913234	PRJEB17784	human gut metagenome	feces	Germany	Europe	‒	‒	WGS	METAGENOMIC	ILLUMINA	Illumina HiSeq 2500	SINGLE
ERR1913235	PRJEB17784	human gut metagenome	feces	Germany	Europe	‒	‒	WGS	METAGENOMIC	ILLUMINA	Illumina HiSeq 2500	SINGLE
ERR1913236	PRJEB17784	human gut metagenome	feces	Germany	Europe	‒	‒	WGS	METAGENOMIC	ILLUMINA	Illumina HiSeq 2500	SINGLE
ERR1913237	PRJEB17784	human gut metagenome	feces	Germany	Europe	‒	‒	WGS	METAGENOMIC	ILLUMINA	Illumina HiSeq 2500	SINGLE
ERR1913238	PRJEB17784	human gut metagenome	feces	Germany	Europe	‒	‒	WGS	METAGENOMIC	ILLUMINA	Illumina HiSeq 2500	SINGLE
ERR1913246	PRJEB17784	human gut metagenome	feces	Germany	Europe	‒	‒	WGS	METAGENOMIC	ILLUMINA	Illumina HiSeq 2500	SINGLE
ERR1913247	PRJEB17784	human gut metagenome	feces	Germany	Europe	‒	‒	WGS	METAGENOMIC	ILLUMINA	Illumina HiSeq 2500	SINGLE
ERR1913248	PRJEB17784	human gut metagenome	feces	Germany	Europe	‒	‒	WGS	METAGENOMIC	ILLUMINA	Illumina HiSeq 2500	SINGLE
ERR1913252	PRJEB17784	human gut metagenome	feces	Germany	Europe	‒	‒	WGS	METAGENOMIC	ILLUMINA	Illumina HiSeq 2500	SINGLE
ERR1913253	PRJEB17784	human gut metagenome	feces	Germany	Europe	‒	‒	WGS	METAGENOMIC	ILLUMINA	Illumina HiSeq 2500	SINGLE
ERR1913254	PRJEB17784	human gut metagenome	feces	Germany	Europe	‒	‒	WGS	METAGENOMIC	ILLUMINA	Illumina HiSeq 2500	SINGLE
ERR1913255	PRJEB17784	human gut metagenome	feces	Germany	Europe	‒	‒	WGS	METAGENOMIC	ILLUMINA	Illumina HiSeq 2500	SINGLE
ERR1913268	PRJEB17784	human gut metagenome	feces	Germany	Europe	‒	‒	WGS	METAGENOMIC	ILLUMINA	Illumina HiSeq 2500	SINGLE
ERR1913269	PRJEB17784	human gut metagenome	feces	Germany	Europe	‒	‒	WGS	METAGENOMIC	ILLUMINA	Illumina HiSeq 2500	SINGLE
ERR1913270	PRJEB17784	human gut metagenome	feces	Germany	Europe	‒	‒	WGS	METAGENOMIC	ILLUMINA	Illumina HiSeq 2500	SINGLE
ERR1913276	PRJEB17784	human gut metagenome	feces	Germany	Europe	‒	‒	WGS	METAGENOMIC	ILLUMINA	Illumina HiSeq 2500	SINGLE
ERR1913279	PRJEB17784	human gut metagenome	feces	Germany	Europe	‒	‒	WGS	METAGENOMIC	ILLUMINA	Illumina HiSeq 2500	SINGLE
ERR1913293	PRJEB17784	human gut metagenome	feces	Germany	Europe	‒	‒	WGS	METAGENOMIC	ILLUMINA	Illumina HiSeq 2500	SINGLE
ERR1913294	PRJEB17784	human gut metagenome	feces	Germany	Europe	‒	‒	WGS	METAGENOMIC	ILLUMINA	Illumina HiSeq 2500	SINGLE
ERR1913295	PRJEB17784	human gut metagenome	feces	Germany	Europe	‒	‒	WGS	METAGENOMIC	ILLUMINA	Illumina HiSeq 2500	SINGLE
ERR1913300	PRJEB17784	human gut metagenome	feces	Germany	Europe	‒	‒	WGS	METAGENOMIC	ILLUMINA	Illumina HiSeq 2500	SINGLE
ERR1913301	PRJEB17784	human gut metagenome	feces	Germany	Europe	‒	‒	WGS	METAGENOMIC	ILLUMINA	Illumina HiSeq 2500	SINGLE
ERR1913302	PRJEB17784	human gut metagenome	feces	Germany	Europe	‒	‒	WGS	METAGENOMIC	ILLUMINA	Illumina HiSeq 2500	SINGLE
ERR1913303	PRJEB17784	human gut metagenome	feces	Germany	Europe	‒	‒	WGS	METAGENOMIC	ILLUMINA	Illumina HiSeq 2500	SINGLE
ERR1913304	PRJEB17784	human gut metagenome	feces	Germany	Europe	‒	‒	WGS	METAGENOMIC	ILLUMINA	Illumina HiSeq 2500	SINGLE
ERR1913305	PRJEB17784	human gut metagenome	feces	Germany	Europe	‒	‒	WGS	METAGENOMIC	ILLUMINA	Illumina HiSeq 2500	SINGLE
ERR1913307	PRJEB17784	human gut metagenome	feces	Germany	Europe	‒	‒	WGS	METAGENOMIC	ILLUMINA	Illumina HiSeq 2500	SINGLE
ERR1913308	PRJEB17784	human gut metagenome	feces	Germany	Europe	‒	‒	WGS	METAGENOMIC	ILLUMINA	Illumina HiSeq 2500	SINGLE
ERR1913310	PRJEB17784	human gut metagenome	feces	Germany	Europe	‒	‒	WGS	METAGENOMIC	ILLUMINA	Illumina HiSeq 2500	SINGLE
ERR1913318	PRJEB17784	human gut metagenome	feces	Germany	Europe	‒	‒	WGS	METAGENOMIC	ILLUMINA	Illumina HiSeq 2500	SINGLE
ERR1913002	PRJEB17784	human gut metagenome	feces	Germany	Europe	‒	‒	WGS	METAGENOMIC	ILLUMINA	Illumina HiSeq 2500	PAIRED
ERR1913029	PRJEB17784	human gut metagenome	feces	Germany	Europe	‒	‒	WGS	METAGENOMIC	ILLUMINA	Illumina HiSeq 2500	PAIRED
ERR1913046	PRJEB17784	human gut metagenome	feces	Germany	Europe	‒	‒	WGS	METAGENOMIC	ILLUMINA	Illumina HiSeq 2500	PAIRED
ERR1913060	PRJEB17784	human gut metagenome	feces	Germany	Europe	‒	‒	WGS	METAGENOMIC	ILLUMINA	Illumina HiSeq 2500	PAIRED
ERR1913078	PRJEB17784	human gut metagenome	feces	Germany	Europe	‒	‒	WGS	METAGENOMIC	ILLUMINA	Illumina HiSeq 2500	PAIRED
ERR1913171	PRJEB17784	human gut metagenome	feces	Germany	Europe	‒	‒	WGS	METAGENOMIC	ILLUMINA	Illumina HiSeq 2500	SINGLE
ERR1913196	PRJEB17784	human gut metagenome	feces	Germany	Europe	‒	‒	WGS	METAGENOMIC	ILLUMINA	Illumina HiSeq 2500	SINGLE
ERR1913200	PRJEB17784	human gut metagenome	feces	Germany	Europe	‒	‒	WGS	METAGENOMIC	ILLUMINA	Illumina HiSeq 2500	SINGLE
ERR1912990	PRJEB17784	human gut metagenome	feces	Germany	Europe	‒	‒	WGS	METAGENOMIC	ILLUMINA	Illumina HiSeq 2500	PAIRED
ERR1913278	PRJEB17784	human gut metagenome	feces	Germany	Europe	‒	‒	WGS	METAGENOMIC	ILLUMINA	Illumina HiSeq 2500	SINGLE
ERR1913292	PRJEB17784	human gut metagenome	feces	Germany	Europe	‒	‒	WGS	METAGENOMIC	ILLUMINA	Illumina HiSeq 2500	SINGLE
ERR1913306	PRJEB17784	human gut metagenome	feces	Germany	Europe	‒	‒	WGS	METAGENOMIC	ILLUMINA	Illumina HiSeq 2500	SINGLE
ERR1913101	PRJEB17784	human gut metagenome	feces	Germany	Europe	‒	‒	WGS	METAGENOMIC	ILLUMINA	Illumina HiSeq 2500	PAIRED
ERR1913014	PRJEB17784	human gut metagenome	feces	Germany	Europe	‒	‒	WGS	METAGENOMIC	ILLUMINA	Illumina HiSeq 2500	PAIRED
ERR1913042	PRJEB17784	human gut metagenome	feces	Germany	Europe	‒	‒	WGS	METAGENOMIC	ILLUMINA	Illumina HiSeq 2500	PAIRED
ERR1913086	PRJEB17784	human gut metagenome	feces	Germany	Europe	‒	‒	WGS	METAGENOMIC	ILLUMINA	Illumina HiSeq 2500	PAIRED
ERR1913111	PRJEB17784	human gut metagenome	feces	Germany	Europe	‒	‒	WGS	METAGENOMIC	ILLUMINA	Illumina HiSeq 2500	PAIRED
ERR1913139	PRJEB17784	human gut metagenome	feces	Germany	Europe	‒	‒	WGS	METAGENOMIC	ILLUMINA	Illumina HiSeq 2500	SINGLE
ERR1913163	PRJEB17784	human gut metagenome	feces	Germany	Europe	‒	‒	WGS	METAGENOMIC	ILLUMINA	Illumina HiSeq 2500	SINGLE
ERR1913194	PRJEB17784	human gut metagenome	feces	Germany	Europe	‒	‒	WGS	METAGENOMIC	ILLUMINA	Illumina HiSeq 2500	SINGLE
ERR1913271	PRJEB17784	human gut metagenome	feces	Germany	Europe	‒	‒	WGS	METAGENOMIC	ILLUMINA	Illumina HiSeq 2500	SINGLE
ERR1913277	PRJEB17784	human gut metagenome	feces	Germany	Europe	‒	‒	WGS	METAGENOMIC	ILLUMINA	Illumina HiSeq 2500	SINGLE
ERR1913006	PRJEB17784	human gut metagenome	feces	Germany	Europe	‒	‒	WGS	METAGENOMIC	ILLUMINA	Illumina HiSeq 2500	PAIRED
ERR1913309	PRJEB17784	human gut metagenome	feces	Germany	Europe	‒	‒	WGS	METAGENOMIC	ILLUMINA	Illumina HiSeq 2500	SINGLE
ERR2017411	PRJEB21528	human gut metagenome	faeces	China	Asia	52	male	WGS	METAGENOMIC	ILLUMINA	Illumina HiSeq 2000	PAIRED
ERR2017412	PRJEB21528	human gut metagenome	faeces	China	Asia	53	male	WGS	METAGENOMIC	ILLUMINA	Illumina HiSeq 2000	PAIRED
ERR2017413	PRJEB21528	human gut metagenome	faeces	China	Asia	48	male	WGS	METAGENOMIC	ILLUMINA	Illumina HiSeq 2000	PAIRED
ERR2017414	PRJEB21528	human gut metagenome	faeces	China	Asia	53	female	WGS	METAGENOMIC	ILLUMINA	Illumina HiSeq 2000	PAIRED
ERR2017415	PRJEB21528	human gut metagenome	faeces	China	Asia	53	female	WGS	METAGENOMIC	ILLUMINA	Illumina HiSeq 2000	PAIRED
ERR2017416	PRJEB21528	human gut metagenome	faeces	China	Asia	60	male	WGS	METAGENOMIC	ILLUMINA	Illumina HiSeq 2000	PAIRED
ERR2017417	PRJEB21528	human gut metagenome	faeces	China	Asia	69	male	WGS	METAGENOMIC	ILLUMINA	Illumina HiSeq 2000	PAIRED
ERR2017418	PRJEB21528	human gut metagenome	faeces	China	Asia	61	female	WGS	METAGENOMIC	ILLUMINA	Illumina HiSeq 2000	PAIRED
ERR2017419	PRJEB21528	human gut metagenome	faeces	China	Asia	44	female	WGS	METAGENOMIC	ILLUMINA	Illumina HiSeq 2000	PAIRED
ERR2017420	PRJEB21528	human gut metagenome	faeces	China	Asia	56	female	WGS	METAGENOMIC	ILLUMINA	Illumina HiSeq 2000	PAIRED
ERR2017421	PRJEB21528	human gut metagenome	faeces	China	Asia	54	female	WGS	METAGENOMIC	ILLUMINA	Illumina HiSeq 2000	PAIRED
ERR2017422	PRJEB21528	human gut metagenome	faeces	China	Asia	41	female	WGS	METAGENOMIC	ILLUMINA	Illumina HiSeq 2000	PAIRED
ERR2017423	PRJEB21528	human gut metagenome	faeces	China	Asia	55	female	WGS	METAGENOMIC	ILLUMINA	Illumina HiSeq 2000	PAIRED
ERR2017424	PRJEB21528	human gut metagenome	faeces	China	Asia	50	female	WGS	METAGENOMIC	ILLUMINA	Illumina HiSeq 2000	PAIRED
ERR2017425	PRJEB21528	human gut metagenome	faeces	China	Asia	39	male	WGS	METAGENOMIC	ILLUMINA	Illumina HiSeq 2000	PAIRED
ERR2017426	PRJEB21528	human gut metagenome	faeces	China	Asia	40	male	WGS	METAGENOMIC	ILLUMINA	Illumina HiSeq 2000	PAIRED
ERR2017427	PRJEB21528	human gut metagenome	faeces	China	Asia	55	female	WGS	METAGENOMIC	ILLUMINA	Illumina HiSeq 2000	PAIRED
ERR2017428	PRJEB21528	human gut metagenome	faeces	China	Asia	54	female	WGS	METAGENOMIC	ILLUMINA	Illumina HiSeq 2000	PAIRED
ERR2017429	PRJEB21528	human gut metagenome	faeces	China	Asia	67	female	WGS	METAGENOMIC	ILLUMINA	Illumina HiSeq 2000	PAIRED
ERR2017430	PRJEB21528	human gut metagenome	faeces	China	Asia	67	male	WGS	METAGENOMIC	ILLUMINA	Illumina HiSeq 2000	PAIRED
ERR2017431	PRJEB21528	human gut metagenome	faeces	China	Asia	38	male	WGS	METAGENOMIC	ILLUMINA	Illumina HiSeq 2000	PAIRED
ERR2017432	PRJEB21528	human gut metagenome	faeces	China	Asia	45	female	WGS	METAGENOMIC	ILLUMINA	Illumina HiSeq 2000	PAIRED
ERR2017433	PRJEB21528	human gut metagenome	faeces	China	Asia	56	male	WGS	METAGENOMIC	ILLUMINA	Illumina HiSeq 2000	PAIRED
ERR2017434	PRJEB21528	human gut metagenome	faeces	China	Asia	53	female	WGS	METAGENOMIC	ILLUMINA	Illumina HiSeq 2000	PAIRED
ERR2017435	PRJEB21528	human gut metagenome	faeces	China	Asia	52	female	WGS	METAGENOMIC	ILLUMINA	Illumina HiSeq 2000	PAIRED
ERR2017436	PRJEB21528	human gut metagenome	faeces	China	Asia	55	male	WGS	METAGENOMIC	ILLUMINA	Illumina HiSeq 2000	PAIRED
ERR2017437	PRJEB21528	human gut metagenome	faeces	China	Asia	52	female	WGS	METAGENOMIC	ILLUMINA	Illumina HiSeq 2000	PAIRED
ERR2017438	PRJEB21528	human gut metagenome	faeces	China	Asia	47	male	WGS	METAGENOMIC	ILLUMINA	Illumina HiSeq 2000	PAIRED
ERR2017439	PRJEB21528	human gut metagenome	faeces	China	Asia	55	female	WGS	METAGENOMIC	ILLUMINA	Illumina HiSeq 2000	PAIRED
ERR2017440	PRJEB21528	human gut metagenome	faeces	China	Asia	50	male	WGS	METAGENOMIC	ILLUMINA	Illumina HiSeq 2000	PAIRED
ERR2017441	PRJEB21528	human gut metagenome	faeces	China	Asia	56	female	WGS	METAGENOMIC	ILLUMINA	Illumina HiSeq 2000	PAIRED
ERR2017442	PRJEB21528	human gut metagenome	faeces	China	Asia	58	female	WGS	METAGENOMIC	ILLUMINA	Illumina HiSeq 2000	PAIRED
ERR2017443	PRJEB21528	human gut metagenome	faeces	China	Asia	70	male	WGS	METAGENOMIC	ILLUMINA	Illumina HiSeq 2000	PAIRED
ERR2017444	PRJEB21528	human gut metagenome	faeces	China	Asia	60	female	WGS	METAGENOMIC	ILLUMINA	Illumina HiSeq 2000	PAIRED
ERR2017445	PRJEB21528	human gut metagenome	faeces	China	Asia	46	female	WGS	METAGENOMIC	ILLUMINA	Illumina HiSeq 2000	PAIRED
ERR2017446	PRJEB21528	human gut metagenome	faeces	China	Asia	61	female	WGS	METAGENOMIC	ILLUMINA	Illumina HiSeq 2000	PAIRED
ERR2017447	PRJEB21528	human gut metagenome	faeces	China	Asia	40	male	WGS	METAGENOMIC	ILLUMINA	Illumina HiSeq 2000	PAIRED
ERR2017448	PRJEB21528	human gut metagenome	faeces	China	Asia	43	female	WGS	METAGENOMIC	ILLUMINA	Illumina HiSeq 2000	PAIRED
ERR2017449	PRJEB21528	human gut metagenome	faeces	China	Asia	60	female	WGS	METAGENOMIC	ILLUMINA	Illumina HiSeq 2000	PAIRED
ERR2017450	PRJEB21528	human gut metagenome	faeces	China	Asia	52	female	WGS	METAGENOMIC	ILLUMINA	Illumina HiSeq 2000	PAIRED
ERR2017451	PRJEB21528	human gut metagenome	faeces	China	Asia	54	male	WGS	METAGENOMIC	ILLUMINA	Illumina HiSeq 2000	PAIRED
ERR2017452	PRJEB21528	human gut metagenome	faeces	China	Asia	57	male	WGS	METAGENOMIC	ILLUMINA	Illumina HiSeq 2000	PAIRED
ERR2017453	PRJEB21528	human gut metagenome	faeces	China	Asia	56	female	WGS	METAGENOMIC	ILLUMINA	Illumina HiSeq 2000	PAIRED
ERR2017454	PRJEB21528	human gut metagenome	faeces	China	Asia	53	male	WGS	METAGENOMIC	ILLUMINA	Illumina HiSeq 2000	PAIRED
ERR2017455	PRJEB21528	human gut metagenome	faeces	China	Asia	59	male	WGS	METAGENOMIC	ILLUMINA	Illumina HiSeq 2000	PAIRED
ERR2017456	PRJEB21528	human gut metagenome	faeces	China	Asia	57	male	WGS	METAGENOMIC	ILLUMINA	Illumina HiSeq 2000	PAIRED
ERR2017457	PRJEB21528	human gut metagenome	faeces	China	Asia	50	male	WGS	METAGENOMIC	ILLUMINA	Illumina HiSeq 2000	PAIRED
ERR2017458	PRJEB21528	human gut metagenome	faeces	China	Asia	62	male	WGS	METAGENOMIC	ILLUMINA	Illumina HiSeq 2000	PAIRED
ERR2017459	PRJEB21528	human gut metagenome	faeces	China	Asia	50	female	WGS	METAGENOMIC	ILLUMINA	Illumina HiSeq 2000	PAIRED
ERR2017460	PRJEB21528	human gut metagenome	faeces	China	Asia	55	male	WGS	METAGENOMIC	ILLUMINA	Illumina HiSeq 2000	PAIRED
ERR2017461	PRJEB21528	human gut metagenome	faeces	China	Asia	74	male	WGS	METAGENOMIC	ILLUMINA	Illumina HiSeq 2000	PAIRED
ERR2017462	PRJEB21528	human gut metagenome	faeces	China	Asia	73	female	WGS	METAGENOMIC	ILLUMINA	Illumina HiSeq 2000	PAIRED
ERR2017463	PRJEB21528	human gut metagenome	faeces	China	Asia	72	female	WGS	METAGENOMIC	ILLUMINA	Illumina HiSeq 2000	PAIRED
ERR2017464	PRJEB21528	human gut metagenome	faeces	China	Asia	65	male	WGS	METAGENOMIC	ILLUMINA	Illumina HiSeq 2000	PAIRED
ERR2017465	PRJEB21528	human gut metagenome	faeces	China	Asia	77	female	WGS	METAGENOMIC	ILLUMINA	Illumina HiSeq 2000	PAIRED
ERR2017466	PRJEB21528	human gut metagenome	faeces	China	Asia	84	male	WGS	METAGENOMIC	ILLUMINA	Illumina HiSeq 2000	PAIRED
ERR2017467	PRJEB21528	human gut metagenome	faeces	China	Asia	74	female	WGS	METAGENOMIC	ILLUMINA	Illumina HiSeq 2000	PAIRED
ERR2017468	PRJEB21528	human gut metagenome	faeces	China	Asia	69	female	WGS	METAGENOMIC	ILLUMINA	Illumina HiSeq 2000	PAIRED
ERR2017469	PRJEB21528	human gut metagenome	faeces	China	Asia	65	female	WGS	METAGENOMIC	ILLUMINA	Illumina HiSeq 2000	PAIRED
ERR2017470	PRJEB21528	human gut metagenome	faeces	China	Asia	67	male	WGS	METAGENOMIC	ILLUMINA	Illumina HiSeq 2000	PAIRED
ERR2017471	PRJEB21528	human gut metagenome	faeces	China	Asia	65	female	WGS	METAGENOMIC	ILLUMINA	Illumina HiSeq 2000	PAIRED
ERR2017472	PRJEB21528	human gut metagenome	faeces	China	Asia	51	female	WGS	METAGENOMIC	ILLUMINA	Illumina HiSeq 2000	PAIRED
ERR2017473	PRJEB21528	human gut metagenome	faeces	China	Asia	54	NA	WGS	METAGENOMIC	ILLUMINA	Illumina HiSeq 2000	PAIRED
ERR2017474	PRJEB21528	human gut metagenome	faeces	China	Asia	53	male	WGS	METAGENOMIC	ILLUMINA	Illumina HiSeq 2000	PAIRED
ERR2017475	PRJEB21528	human gut metagenome	faeces	China	Asia	51	female	WGS	METAGENOMIC	ILLUMINA	Illumina HiSeq 2000	PAIRED
ERR2017476	PRJEB21528	human gut metagenome	faeces	China	Asia	61	male	WGS	METAGENOMIC	ILLUMINA	Illumina HiSeq 2000	PAIRED
ERR2017477	PRJEB21528	human gut metagenome	faeces	China	Asia	61	female	WGS	METAGENOMIC	ILLUMINA	Illumina HiSeq 2000	PAIRED
ERR2017478	PRJEB21528	human gut metagenome	faeces	China	Asia	59	female	WGS	METAGENOMIC	ILLUMINA	Illumina HiSeq 2000	PAIRED
ERR2017479	PRJEB21528	human gut metagenome	faeces	China	Asia	62	female	WGS	METAGENOMIC	ILLUMINA	Illumina HiSeq 2000	PAIRED
ERR2017480	PRJEB21528	human gut metagenome	faeces	China	Asia	57	female	WGS	METAGENOMIC	ILLUMINA	Illumina HiSeq 2000	PAIRED
ERR2017481	PRJEB21528	human gut metagenome	faeces	China	Asia	58	female	WGS	METAGENOMIC	ILLUMINA	Illumina HiSeq 2000	PAIRED
ERR2017482	PRJEB21528	human gut metagenome	faeces	China	Asia	60	male	WGS	METAGENOMIC	ILLUMINA	Illumina HiSeq 2000	PAIRED
ERR2017483	PRJEB21528	human gut metagenome	faeces	China	Asia	58	male	WGS	METAGENOMIC	ILLUMINA	Illumina HiSeq 2000	PAIRED
ERR2017484	PRJEB21528	human gut metagenome	faeces	China	Asia	70	male	WGS	METAGENOMIC	ILLUMINA	Illumina HiSeq 2000	PAIRED
ERR2017485	PRJEB21528	human gut metagenome	faeces	China	Asia	66	female	WGS	METAGENOMIC	ILLUMINA	Illumina HiSeq 2000	PAIRED
ERR2017486	PRJEB21528	human gut metagenome	faeces	China	Asia	57	female	WGS	METAGENOMIC	ILLUMINA	Illumina HiSeq 2000	PAIRED
ERR2017487	PRJEB21528	human gut metagenome	faeces	China	Asia	56	female	WGS	METAGENOMIC	ILLUMINA	Illumina HiSeq 2000	PAIRED
ERR2017488	PRJEB21528	human gut metagenome	faeces	China	Asia	64	female	WGS	METAGENOMIC	ILLUMINA	Illumina HiSeq 2000	PAIRED
ERR2017489	PRJEB21528	human gut metagenome	faeces	China	Asia	56	male	WGS	METAGENOMIC	ILLUMINA	Illumina HiSeq 2000	PAIRED
ERR2017490	PRJEB21528	human gut metagenome	faeces	China	Asia	59	male	WGS	METAGENOMIC	ILLUMINA	Illumina HiSeq 2000	PAIRED
ERR2017491	PRJEB21528	human gut metagenome	faeces	China	Asia	67	male	WGS	METAGENOMIC	ILLUMINA	Illumina HiSeq 2000	PAIRED
ERR2017492	PRJEB21528	human gut metagenome	faeces	China	Asia	59	female	WGS	METAGENOMIC	ILLUMINA	Illumina HiSeq 2000	PAIRED
ERR2017493	PRJEB21528	human gut metagenome	faeces	China	Asia	58	female	WGS	METAGENOMIC	ILLUMINA	Illumina HiSeq 2000	PAIRED
ERR2017494	PRJEB21528	human gut metagenome	faeces	China	Asia	57	female	WGS	METAGENOMIC	ILLUMINA	Illumina HiSeq 2000	PAIRED
ERR2017495	PRJEB21528	human gut metagenome	faeces	China	Asia	53	female	WGS	METAGENOMIC	ILLUMINA	Illumina HiSeq 2000	PAIRED
ERR2017496	PRJEB21528	human gut metagenome	faeces	China	Asia	50	female	WGS	METAGENOMIC	ILLUMINA	Illumina HiSeq 2000	PAIRED
ERR2017497	PRJEB21528	human gut metagenome	faeces	China	Asia	59	female	WGS	METAGENOMIC	ILLUMINA	Illumina HiSeq 2000	PAIRED
ERR2017498	PRJEB21528	human gut metagenome	faeces	China	Asia	51	male	WGS	METAGENOMIC	ILLUMINA	Illumina HiSeq 2000	PAIRED
ERR2017499	PRJEB21528	human gut metagenome	faeces	China	Asia	69	female	WGS	METAGENOMIC	ILLUMINA	Illumina HiSeq 2000	PAIRED
ERR2017500	PRJEB21528	human gut metagenome	faeces	China	Asia	65	male	WGS	METAGENOMIC	ILLUMINA	Illumina HiSeq 2000	PAIRED
ERR2017501	PRJEB21528	human gut metagenome	faeces	China	Asia	62	female	WGS	METAGENOMIC	ILLUMINA	Illumina HiSeq 2000	PAIRED
ERR2017502	PRJEB21528	human gut metagenome	faeces	China	Asia	53	male	WGS	METAGENOMIC	ILLUMINA	Illumina HiSeq 2000	PAIRED
ERR2017503	PRJEB21528	human gut metagenome	faeces	China	Asia	58	female	WGS	METAGENOMIC	ILLUMINA	Illumina HiSeq 2000	PAIRED
ERR2017504	PRJEB21528	human gut metagenome	faeces	China	Asia	57	male	WGS	METAGENOMIC	ILLUMINA	Illumina HiSeq 2000	PAIRED
ERR2017505	PRJEB21528	human gut metagenome	faeces	China	Asia	61	male	WGS	METAGENOMIC	ILLUMINA	Illumina HiSeq 2000	PAIRED
ERR2017506	PRJEB21528	human gut metagenome	faeces	China	Asia	55	female	WGS	METAGENOMIC	ILLUMINA	Illumina HiSeq 2000	PAIRED
ERR2017507	PRJEB21528	human gut metagenome	faeces	China	Asia	59	male	WGS	METAGENOMIC	ILLUMINA	Illumina HiSeq 2000	PAIRED
ERR2017508	PRJEB21528	human gut metagenome	faeces	China	Asia	63	male	WGS	METAGENOMIC	ILLUMINA	Illumina HiSeq 2000	PAIRED
ERR2017509	PRJEB21528	human gut metagenome	faeces	China	Asia	65	female	WGS	METAGENOMIC	ILLUMINA	Illumina HiSeq 2000	PAIRED
ERR2017510	PRJEB21528	human gut metagenome	faeces	China	Asia	59	female	WGS	METAGENOMIC	ILLUMINA	Illumina HiSeq 2000	PAIRED
ERR2017511	PRJEB21528	human gut metagenome	faeces	China	Asia	65	female	WGS	METAGENOMIC	ILLUMINA	Illumina HiSeq 2000	PAIRED
ERR2017512	PRJEB21528	human gut metagenome	faeces	China	Asia	64	male	WGS	METAGENOMIC	ILLUMINA	Illumina HiSeq 2000	PAIRED
ERR2017513	PRJEB21528	human gut metagenome	faeces	China	Asia	59	female	WGS	METAGENOMIC	ILLUMINA	Illumina HiSeq 2000	PAIRED
ERR2017514	PRJEB21528	human gut metagenome	faeces	China	Asia	62	female	WGS	METAGENOMIC	ILLUMINA	Illumina HiSeq 2000	PAIRED
ERR2017515	PRJEB21528	human gut metagenome	faeces	China	Asia	53	male	WGS	METAGENOMIC	ILLUMINA	Illumina HiSeq 2000	PAIRED
ERR2017516	PRJEB21528	human gut metagenome	faeces	China	Asia	61	female	WGS	METAGENOMIC	ILLUMINA	Illumina HiSeq 2000	PAIRED
ERR2017517	PRJEB21528	human gut metagenome	faeces	China	Asia	61	male	WGS	METAGENOMIC	ILLUMINA	Illumina HiSeq 2000	PAIRED
ERR2017518	PRJEB21528	human gut metagenome	faeces	China	Asia	68	male	WGS	METAGENOMIC	ILLUMINA	Illumina HiSeq 2000	PAIRED
ERR2017519	PRJEB21528	human gut metagenome	faeces	China	Asia	80	female	WGS	METAGENOMIC	ILLUMINA	Illumina HiSeq 2000	PAIRED
ERR2017520	PRJEB21528	human gut metagenome	faeces	China	Asia	71	male	WGS	METAGENOMIC	ILLUMINA	Illumina HiSeq 2000	PAIRED
ERR2017521	PRJEB21528	human gut metagenome	faeces	China	Asia	74	male	WGS	METAGENOMIC	ILLUMINA	Illumina HiSeq 2000	PAIRED
ERR2017522	PRJEB21528	human gut metagenome	faeces	China	Asia	65	female	WGS	METAGENOMIC	ILLUMINA	Illumina HiSeq 2000	PAIRED
ERR2017523	PRJEB21528	human gut metagenome	faeces	China	Asia	66	male	WGS	METAGENOMIC	ILLUMINA	Illumina HiSeq 2000	PAIRED
ERR2017524	PRJEB21528	human gut metagenome	faeces	China	Asia	79	female	WGS	METAGENOMIC	ILLUMINA	Illumina HiSeq 2000	PAIRED
ERR2017525	PRJEB21528	human gut metagenome	faeces	China	Asia	70	female	WGS	METAGENOMIC	ILLUMINA	Illumina HiSeq 2000	PAIRED
ERR2017526	PRJEB21528	human gut metagenome	faeces	China	Asia	66	female	WGS	METAGENOMIC	ILLUMINA	Illumina HiSeq 2000	PAIRED
ERR2017527	PRJEB21528	human gut metagenome	faeces	China	Asia	65	male	WGS	METAGENOMIC	ILLUMINA	Illumina HiSeq 2000	PAIRED
ERR2017528	PRJEB21528	human gut metagenome	faeces	China	Asia	74	female	WGS	METAGENOMIC	ILLUMINA	Illumina HiSeq 2000	PAIRED
ERR2017529	PRJEB21528	human gut metagenome	faeces	China	Asia	79	male	WGS	METAGENOMIC	ILLUMINA	Illumina HiSeq 2000	PAIRED
ERR2017530	PRJEB21528	human gut metagenome	faeces	China	Asia	69	female	WGS	METAGENOMIC	ILLUMINA	Illumina HiSeq 2000	PAIRED
ERR2017531	PRJEB21528	human gut metagenome	faeces	China	Asia	107	male	WGS	METAGENOMIC	ILLUMINA	Illumina HiSeq 2000	PAIRED
ERR2017532	PRJEB21528	human gut metagenome	faeces	China	Asia	NA	female	WGS	METAGENOMIC	ILLUMINA	Illumina HiSeq 2000	PAIRED
ERR2017533	PRJEB21528	human gut metagenome	faeces	China	Asia	63	female	WGS	METAGENOMIC	ILLUMINA	Illumina HiSeq 2000	PAIRED
ERR2017534	PRJEB21528	human gut metagenome	faeces	China	Asia	56	female	WGS	METAGENOMIC	ILLUMINA	Illumina HiSeq 2000	PAIRED
ERR2017535	PRJEB21528	human gut metagenome	faeces	China	Asia	58	female	WGS	METAGENOMIC	ILLUMINA	Illumina HiSeq 2000	PAIRED
ERR2017536	PRJEB21528	human gut metagenome	faeces	China	Asia	65	male	WGS	METAGENOMIC	ILLUMINA	Illumina HiSeq 2000	PAIRED
ERR2017537	PRJEB21528	human gut metagenome	faeces	China	Asia	57	male	WGS	METAGENOMIC	ILLUMINA	Illumina HiSeq 2000	PAIRED
ERR2017538	PRJEB21528	human gut metagenome	faeces	China	Asia	NA	female	WGS	METAGENOMIC	ILLUMINA	Illumina HiSeq 2000	PAIRED
ERR2017539	PRJEB21528	human gut metagenome	faeces	China	Asia	NA	male	WGS	METAGENOMIC	ILLUMINA	Illumina HiSeq 2000	PAIRED
ERR2017540	PRJEB21528	human gut metagenome	faeces	China	Asia	54	male	WGS	METAGENOMIC	ILLUMINA	Illumina HiSeq 2000	PAIRED
ERR2017541	PRJEB21528	human gut metagenome	faeces	China	Asia	56	female	WGS	METAGENOMIC	ILLUMINA	Illumina HiSeq 2000	PAIRED
ERR2017542	PRJEB21528	human gut metagenome	faeces	China	Asia	58	male	WGS	METAGENOMIC	ILLUMINA	Illumina HiSeq 2000	PAIRED
ERR2017543	PRJEB21528	human gut metagenome	faeces	China	Asia	51	male	WGS	METAGENOMIC	ILLUMINA	Illumina HiSeq 2000	PAIRED
ERR2017544	PRJEB21528	human gut metagenome	faeces	China	Asia	56	female	WGS	METAGENOMIC	ILLUMINA	Illumina HiSeq 2000	PAIRED
ERR2017545	PRJEB21528	human gut metagenome	faeces	China	Asia	66	male	WGS	METAGENOMIC	ILLUMINA	Illumina HiSeq 2000	PAIRED
ERR2017546	PRJEB21528	human gut metagenome	faeces	China	Asia	66	male	WGS	METAGENOMIC	ILLUMINA	Illumina HiSeq 2000	PAIRED
ERR2017547	PRJEB21528	human gut metagenome	faeces	China	Asia	57	female	WGS	METAGENOMIC	ILLUMINA	Illumina HiSeq 2000	PAIRED
ERR2017548	PRJEB21528	human gut metagenome	faeces	China	Asia	58	female	WGS	METAGENOMIC	ILLUMINA	Illumina HiSeq 2000	PAIRED
ERR2017549	PRJEB21528	human gut metagenome	faeces	China	Asia	57	female	WGS	METAGENOMIC	ILLUMINA	Illumina HiSeq 2000	PAIRED
ERR2017550	PRJEB21528	human gut metagenome	faeces	China	Asia	58	male	WGS	METAGENOMIC	ILLUMINA	Illumina HiSeq 2000	PAIRED
ERR2017551	PRJEB21528	human gut metagenome	faeces	China	Asia	58	female	WGS	METAGENOMIC	ILLUMINA	Illumina HiSeq 2000	PAIRED
ERR2017552	PRJEB21528	human gut metagenome	faeces	China	Asia	69	male	WGS	METAGENOMIC	ILLUMINA	Illumina HiSeq 2000	PAIRED
ERR2017553	PRJEB21528	human gut metagenome	faeces	China	Asia	68	female	WGS	METAGENOMIC	ILLUMINA	Illumina HiSeq 2000	PAIRED
ERR2017554	PRJEB21528	human gut metagenome	faeces	China	Asia	63	female	WGS	METAGENOMIC	ILLUMINA	Illumina HiSeq 2000	PAIRED
ERR2017555	PRJEB21528	human gut metagenome	faeces	China	Asia	62	male	WGS	METAGENOMIC	ILLUMINA	Illumina HiSeq 2000	PAIRED
ERR2017556	PRJEB21528	human gut metagenome	faeces	China	Asia	67	female	WGS	METAGENOMIC	ILLUMINA	Illumina HiSeq 2000	PAIRED
ERR2017557	PRJEB21528	human gut metagenome	faeces	China	Asia	61	female	WGS	METAGENOMIC	ILLUMINA	Illumina HiSeq 2000	PAIRED
ERR2017558	PRJEB21528	human gut metagenome	faeces	China	Asia	55	male	WGS	METAGENOMIC	ILLUMINA	Illumina HiSeq 2000	PAIRED
ERR2017559	PRJEB21528	human gut metagenome	faeces	China	Asia	56	female	WGS	METAGENOMIC	ILLUMINA	Illumina HiSeq 2000	PAIRED
ERR2017560	PRJEB21528	human gut metagenome	faeces	China	Asia	61	female	WGS	METAGENOMIC	ILLUMINA	Illumina HiSeq 2000	PAIRED
ERR2017561	PRJEB21528	human gut metagenome	faeces	China	Asia	55	female	WGS	METAGENOMIC	ILLUMINA	Illumina HiSeq 2000	PAIRED
ERR2017562	PRJEB21528	human gut metagenome	faeces	China	Asia	56	female	WGS	METAGENOMIC	ILLUMINA	Illumina HiSeq 2000	PAIRED
ERR2017563	PRJEB21528	human gut metagenome	faeces	China	Asia	107	female	WGS	METAGENOMIC	ILLUMINA	Illumina HiSeq 2000	PAIRED
ERR2017564	PRJEB21528	human gut metagenome	faeces	China	Asia	62	male	WGS	METAGENOMIC	ILLUMINA	Illumina HiSeq 2000	PAIRED
ERR2017565	PRJEB21528	human gut metagenome	faeces	China	Asia	59	male	WGS	METAGENOMIC	ILLUMINA	Illumina HiSeq 2000	PAIRED
ERR2017566	PRJEB21528	human gut metagenome	faeces	China	Asia	61	female	WGS	METAGENOMIC	ILLUMINA	Illumina HiSeq 2000	PAIRED
ERR2017567	PRJEB21528	human gut metagenome	faeces	China	Asia	57	female	WGS	METAGENOMIC	ILLUMINA	Illumina HiSeq 2000	PAIRED
ERR2017568	PRJEB21528	human gut metagenome	faeces	China	Asia	107	male	WGS	METAGENOMIC	ILLUMINA	Illumina HiSeq 2000	PAIRED
ERR2017569	PRJEB21528	human gut metagenome	faeces	China	Asia	62	female	WGS	METAGENOMIC	ILLUMINA	Illumina HiSeq 2000	PAIRED
ERR2017570	PRJEB21528	human gut metagenome	faeces	China	Asia	61	female	WGS	METAGENOMIC	ILLUMINA	Illumina HiSeq 2000	PAIRED
ERR2017571	PRJEB21528	human gut metagenome	faeces	China	Asia	61	male	WGS	METAGENOMIC	ILLUMINA	Illumina HiSeq 2000	PAIRED
ERR2017572	PRJEB21528	human gut metagenome	faeces	China	Asia	62	female	WGS	METAGENOMIC	ILLUMINA	Illumina HiSeq 2000	PAIRED
ERR2017573	PRJEB21528	human gut metagenome	faeces	China	Asia	63	male	WGS	METAGENOMIC	ILLUMINA	Illumina HiSeq 2000	PAIRED
ERR2017574	PRJEB21528	human gut metagenome	faeces	China	Asia	62	female	WGS	METAGENOMIC	ILLUMINA	Illumina HiSeq 2000	PAIRED
ERR2017575	PRJEB21528	human gut metagenome	faeces	China	Asia	61	male	WGS	METAGENOMIC	ILLUMINA	Illumina HiSeq 2000	PAIRED
ERR2017576	PRJEB21528	human gut metagenome	faeces	China	Asia	NA	female	WGS	METAGENOMIC	ILLUMINA	Illumina HiSeq 2000	PAIRED
ERR2017577	PRJEB21528	human gut metagenome	faeces	China	Asia	65	male	WGS	METAGENOMIC	ILLUMINA	Illumina HiSeq 2000	PAIRED
ERR2017578	PRJEB21528	human gut metagenome	faeces	China	Asia	NA	female	WGS	METAGENOMIC	ILLUMINA	Illumina HiSeq 2000	PAIRED
ERR2017579	PRJEB21528	human gut metagenome	faeces	China	Asia	NA	female	WGS	METAGENOMIC	ILLUMINA	Illumina HiSeq 2000	PAIRED
ERR2017580	PRJEB21528	human gut metagenome	faeces	China	Asia	NA	female	WGS	METAGENOMIC	ILLUMINA	Illumina HiSeq 2000	PAIRED
ERR2017581	PRJEB21528	human gut metagenome	faeces	China	Asia	56	female	WGS	METAGENOMIC	ILLUMINA	Illumina HiSeq 2000	PAIRED
ERR2017582	PRJEB21528	human gut metagenome	faeces	China	Asia	61	female	WGS	METAGENOMIC	ILLUMINA	Illumina HiSeq 2000	PAIRED
ERR2017583	PRJEB21528	human gut metagenome	faeces	China	Asia	61	male	WGS	METAGENOMIC	ILLUMINA	Illumina HiSeq 2000	PAIRED
ERR2017584	PRJEB21528	human gut metagenome	faeces	China	Asia	56	female	WGS	METAGENOMIC	ILLUMINA	Illumina HiSeq 2000	PAIRED
ERR2017585	PRJEB21528	human gut metagenome	faeces	China	Asia	65	male	WGS	METAGENOMIC	ILLUMINA	Illumina HiSeq 2000	PAIRED
ERR2017586	PRJEB21528	human gut metagenome	faeces	China	Asia	58	female	WGS	METAGENOMIC	ILLUMINA	Illumina HiSeq 2000	PAIRED
ERR2017587	PRJEB21528	human gut metagenome	faeces	China	Asia	60	female	WGS	METAGENOMIC	ILLUMINA	Illumina HiSeq 2000	PAIRED
ERR2017588	PRJEB21528	human gut metagenome	faeces	China	Asia	55	female	WGS	METAGENOMIC	ILLUMINA	Illumina HiSeq 2000	PAIRED
ERR2017589	PRJEB21528	human gut metagenome	faeces	China	Asia	57	female	WGS	METAGENOMIC	ILLUMINA	Illumina HiSeq 2000	PAIRED
ERR2017590	PRJEB21528	human gut metagenome	faeces	China	Asia	61	male	WGS	METAGENOMIC	ILLUMINA	Illumina HiSeq 2000	PAIRED
ERR2017591	PRJEB21528	human gut metagenome	faeces	China	Asia	59	female	WGS	METAGENOMIC	ILLUMINA	Illumina HiSeq 2000	PAIRED
ERR2017592	PRJEB21528	human gut metagenome	faeces	China	Asia	59	female	WGS	METAGENOMIC	ILLUMINA	Illumina HiSeq 2000	PAIRED
ERR2017593	PRJEB21528	human gut metagenome	faeces	China	Asia	54	female	WGS	METAGENOMIC	ILLUMINA	Illumina HiSeq 2000	PAIRED
ERR2017594	PRJEB21528	human gut metagenome	faeces	China	Asia	62	female	WGS	METAGENOMIC	ILLUMINA	Illumina HiSeq 2000	PAIRED
ERR2017595	PRJEB21528	human gut metagenome	faeces	China	Asia	63	female	WGS	METAGENOMIC	ILLUMINA	Illumina HiSeq 2000	PAIRED
ERR2017596	PRJEB21528	human gut metagenome	faeces	China	Asia	60	female	WGS	METAGENOMIC	ILLUMINA	Illumina HiSeq 2000	PAIRED
ERR2017597	PRJEB21528	human gut metagenome	faeces	China	Asia	62	male	WGS	METAGENOMIC	ILLUMINA	Illumina HiSeq 2000	PAIRED
ERR2205743	PRJEB23662	human gut metagenome	feces	China	Asia	‒	‒	WGS	METAGENOMIC	ILLUMINA	Illumina HiSeq 4000	SINGLE
ERR2205744	PRJEB23662	human gut metagenome	feces	China	Asia	‒	‒	WGS	METAGENOMIC	ILLUMINA	Illumina HiSeq 4000	SINGLE
ERR2205745	PRJEB23662	human gut metagenome	feces	China	Asia	‒	‒	WGS	METAGENOMIC	ILLUMINA	Illumina HiSeq 4000	SINGLE
ERR2205746	PRJEB23662	human gut metagenome	feces	China	Asia	‒	‒	WGS	METAGENOMIC	ILLUMINA	Illumina HiSeq 4000	SINGLE
ERR2205747	PRJEB23662	human gut metagenome	feces	China	Asia	‒	‒	WGS	METAGENOMIC	ILLUMINA	Illumina HiSeq 4000	SINGLE
ERR2205748	PRJEB23662	human gut metagenome	feces	China	Asia	‒	‒	WGS	METAGENOMIC	ILLUMINA	Illumina HiSeq 4000	SINGLE
ERR2205749	PRJEB23662	human gut metagenome	feces	China	Asia	‒	‒	WGS	METAGENOMIC	ILLUMINA	Illumina HiSeq 4000	SINGLE
ERR2205750	PRJEB23662	human gut metagenome	feces	China	Asia	‒	‒	WGS	METAGENOMIC	ILLUMINA	Illumina HiSeq 4000	SINGLE
ERR2205751	PRJEB23662	human gut metagenome	feces	China	Asia	‒	‒	WGS	METAGENOMIC	ILLUMINA	Illumina HiSeq 4000	SINGLE
ERR2205752	PRJEB23662	human gut metagenome	feces	China	Asia	‒	‒	WGS	METAGENOMIC	ILLUMINA	Illumina HiSeq 4000	SINGLE
ERR2205753	PRJEB23662	human gut metagenome	feces	China	Asia	‒	‒	WGS	METAGENOMIC	ILLUMINA	Illumina HiSeq 4000	SINGLE
ERR2205754	PRJEB23662	human gut metagenome	feces	China	Asia	‒	‒	WGS	METAGENOMIC	ILLUMINA	Illumina HiSeq 4000	SINGLE
ERR2205755	PRJEB23662	human gut metagenome	feces	China	Asia	‒	‒	WGS	METAGENOMIC	ILLUMINA	Illumina HiSeq 4000	SINGLE
ERR2205756	PRJEB23662	human gut metagenome	feces	China	Asia	‒	‒	WGS	METAGENOMIC	ILLUMINA	Illumina HiSeq 4000	SINGLE
ERR2205757	PRJEB23662	human gut metagenome	feces	China	Asia	‒	‒	WGS	METAGENOMIC	ILLUMINA	Illumina HiSeq 4000	SINGLE
ERR2205758	PRJEB23662	human gut metagenome	feces	China	Asia	‒	‒	WGS	METAGENOMIC	ILLUMINA	Illumina HiSeq 4000	SINGLE
ERR2205759	PRJEB23662	human gut metagenome	feces	China	Asia	‒	‒	WGS	METAGENOMIC	ILLUMINA	Illumina HiSeq 4000	SINGLE
ERR2205760	PRJEB23662	human gut metagenome	feces	China	Asia	‒	‒	WGS	METAGENOMIC	ILLUMINA	Illumina HiSeq 4000	SINGLE
ERR2205761	PRJEB23662	human gut metagenome	feces	China	Asia	‒	‒	WGS	METAGENOMIC	ILLUMINA	Illumina HiSeq 4000	SINGLE
ERR2205762	PRJEB23662	human gut metagenome	feces	China	Asia	‒	‒	WGS	METAGENOMIC	ILLUMINA	Illumina HiSeq 4000	SINGLE
ERR2205763	PRJEB23662	human gut metagenome	feces	China	Asia	‒	‒	WGS	METAGENOMIC	ILLUMINA	Illumina HiSeq 4000	SINGLE
ERR2205764	PRJEB23662	human gut metagenome	feces	China	Asia	‒	‒	WGS	METAGENOMIC	ILLUMINA	Illumina HiSeq 4000	SINGLE
ERR2205765	PRJEB23662	human gut metagenome	feces	China	Asia	‒	‒	WGS	METAGENOMIC	ILLUMINA	Illumina HiSeq 4000	SINGLE
ERR2205766	PRJEB23662	human gut metagenome	feces	China	Asia	‒	‒	WGS	METAGENOMIC	ILLUMINA	Illumina HiSeq 4000	SINGLE
ERR2205767	PRJEB23662	human gut metagenome	feces	China	Asia	‒	‒	WGS	METAGENOMIC	ILLUMINA	Illumina HiSeq 4000	SINGLE
ERR2205768	PRJEB23662	human gut metagenome	feces	China	Asia	‒	‒	WGS	METAGENOMIC	ILLUMINA	Illumina HiSeq 4000	SINGLE
ERR2205769	PRJEB23662	human gut metagenome	feces	China	Asia	‒	‒	WGS	METAGENOMIC	ILLUMINA	Illumina HiSeq 4000	SINGLE
ERR2205770	PRJEB23662	human gut metagenome	feces	China	Asia	‒	‒	WGS	METAGENOMIC	ILLUMINA	Illumina HiSeq 4000	SINGLE
ERR2205771	PRJEB23662	human gut metagenome	feces	China	Asia	‒	‒	WGS	METAGENOMIC	ILLUMINA	Illumina HiSeq 4000	SINGLE
ERR2205772	PRJEB23662	human gut metagenome	feces	China	Asia	‒	‒	WGS	METAGENOMIC	ILLUMINA	Illumina HiSeq 4000	SINGLE
ERR2205773	PRJEB23662	human gut metagenome	feces	China	Asia	‒	‒	WGS	METAGENOMIC	ILLUMINA	Illumina HiSeq 4000	SINGLE
ERR2205774	PRJEB23662	human gut metagenome	feces	China	Asia	‒	‒	WGS	METAGENOMIC	ILLUMINA	Illumina HiSeq 4000	SINGLE
ERR2205775	PRJEB23662	human gut metagenome	feces	China	Asia	‒	‒	WGS	METAGENOMIC	ILLUMINA	Illumina HiSeq 4000	SINGLE
ERR2205776	PRJEB23662	human gut metagenome	feces	China	Asia	‒	‒	WGS	METAGENOMIC	ILLUMINA	Illumina HiSeq 4000	SINGLE
ERR2205777	PRJEB23662	human gut metagenome	feces	China	Asia	‒	‒	WGS	METAGENOMIC	ILLUMINA	Illumina HiSeq 4000	SINGLE
ERR2205778	PRJEB23662	human gut metagenome	feces	China	Asia	‒	‒	WGS	METAGENOMIC	ILLUMINA	Illumina HiSeq 4000	SINGLE
ERR2205779	PRJEB23662	human gut metagenome	feces	China	Asia	‒	‒	WGS	METAGENOMIC	ILLUMINA	Illumina HiSeq 4000	SINGLE
ERR2205780	PRJEB23662	human gut metagenome	feces	China	Asia	‒	‒	WGS	METAGENOMIC	ILLUMINA	Illumina HiSeq 4000	SINGLE
ERR2205781	PRJEB23662	human gut metagenome	feces	China	Asia	‒	‒	WGS	METAGENOMIC	ILLUMINA	Illumina HiSeq 4000	SINGLE
ERR2205782	PRJEB23662	human gut metagenome	feces	China	Asia	‒	‒	WGS	METAGENOMIC	ILLUMINA	Illumina HiSeq 4000	SINGLE
ERR2205783	PRJEB23662	human gut metagenome	feces	China	Asia	‒	‒	WGS	METAGENOMIC	ILLUMINA	Illumina HiSeq 4000	SINGLE
ERR2205784	PRJEB23662	human gut metagenome	feces	China	Asia	‒	‒	WGS	METAGENOMIC	ILLUMINA	Illumina HiSeq 4000	SINGLE
ERR2205785	PRJEB23662	human gut metagenome	feces	China	Asia	‒	‒	WGS	METAGENOMIC	ILLUMINA	Illumina HiSeq 4000	SINGLE
ERR2205786	PRJEB23662	human gut metagenome	feces	China	Asia	‒	‒	WGS	METAGENOMIC	ILLUMINA	Illumina HiSeq 4000	SINGLE
ERR2205787	PRJEB23662	human gut metagenome	feces	China	Asia	‒	‒	WGS	METAGENOMIC	ILLUMINA	Illumina HiSeq 4000	SINGLE
ERR2205788	PRJEB23662	human gut metagenome	feces	China	Asia	‒	‒	WGS	METAGENOMIC	ILLUMINA	Illumina HiSeq 4000	SINGLE
ERR2205789	PRJEB23662	human gut metagenome	feces	China	Asia	‒	‒	WGS	METAGENOMIC	ILLUMINA	Illumina HiSeq 4000	SINGLE
ERR2205790	PRJEB23662	human gut metagenome	feces	China	Asia	‒	‒	WGS	METAGENOMIC	ILLUMINA	Illumina HiSeq 4000	SINGLE
ERR2205791	PRJEB23662	human gut metagenome	feces	China	Asia	‒	‒	WGS	METAGENOMIC	ILLUMINA	Illumina HiSeq 4000	SINGLE
ERR2205792	PRJEB23662	human gut metagenome	feces	China	Asia	‒	‒	WGS	METAGENOMIC	ILLUMINA	Illumina HiSeq 4000	SINGLE
ERR2205793	PRJEB23662	human gut metagenome	feces	China	Asia	‒	‒	WGS	METAGENOMIC	ILLUMINA	Illumina HiSeq 4000	SINGLE
ERR2205794	PRJEB23662	human gut metagenome	feces	China	Asia	‒	‒	WGS	METAGENOMIC	ILLUMINA	Illumina HiSeq 4000	SINGLE
ERR2205795	PRJEB23662	human gut metagenome	feces	China	Asia	‒	‒	WGS	METAGENOMIC	ILLUMINA	Illumina HiSeq 4000	SINGLE
ERR2205796	PRJEB23662	human gut metagenome	feces	China	Asia	‒	‒	WGS	METAGENOMIC	ILLUMINA	Illumina HiSeq 4000	SINGLE
ERR2205797	PRJEB23662	human gut metagenome	feces	China	Asia	‒	‒	WGS	METAGENOMIC	ILLUMINA	Illumina HiSeq 4000	SINGLE
ERR2205798	PRJEB23662	human gut metagenome	feces	China	Asia	‒	‒	WGS	METAGENOMIC	ILLUMINA	Illumina HiSeq 4000	SINGLE
ERR2205799	PRJEB23662	human gut metagenome	feces	China	Asia	‒	‒	WGS	METAGENOMIC	ILLUMINA	Illumina HiSeq 4000	SINGLE
ERR2205800	PRJEB23662	human gut metagenome	feces	China	Asia	‒	‒	WGS	METAGENOMIC	ILLUMINA	Illumina HiSeq 4000	SINGLE
ERR2205801	PRJEB23662	human gut metagenome	feces	China	Asia	‒	‒	WGS	METAGENOMIC	ILLUMINA	Illumina HiSeq 4000	SINGLE
ERR2205802	PRJEB23662	human gut metagenome	feces	China	Asia	‒	‒	WGS	METAGENOMIC	ILLUMINA	Illumina HiSeq 4000	SINGLE
ERR2205803	PRJEB23662	human gut metagenome	feces	China	Asia	‒	‒	WGS	METAGENOMIC	ILLUMINA	Illumina HiSeq 4000	SINGLE
ERR2205804	PRJEB23662	human gut metagenome	feces	China	Asia	‒	‒	WGS	METAGENOMIC	ILLUMINA	Illumina HiSeq 4000	SINGLE
ERR2205805	PRJEB23662	human gut metagenome	feces	China	Asia	‒	‒	WGS	METAGENOMIC	ILLUMINA	Illumina HiSeq 4000	SINGLE
ERR2205806	PRJEB23662	human gut metagenome	feces	China	Asia	‒	‒	WGS	METAGENOMIC	ILLUMINA	Illumina HiSeq 4000	SINGLE
ERR2205807	PRJEB23662	human gut metagenome	feces	China	Asia	‒	‒	WGS	METAGENOMIC	ILLUMINA	Illumina HiSeq 4000	SINGLE
ERR2205808	PRJEB23662	human gut metagenome	feces	China	Asia	‒	‒	WGS	METAGENOMIC	ILLUMINA	Illumina HiSeq 4000	SINGLE
ERR2205809	PRJEB23662	human gut metagenome	feces	China	Asia	‒	‒	WGS	METAGENOMIC	ILLUMINA	Illumina HiSeq 4000	SINGLE
ERR2205810	PRJEB23662	human gut metagenome	feces	China	Asia	‒	‒	WGS	METAGENOMIC	ILLUMINA	Illumina HiSeq 4000	SINGLE
ERR2205811	PRJEB23662	human gut metagenome	feces	China	Asia	‒	‒	WGS	METAGENOMIC	ILLUMINA	Illumina HiSeq 4000	SINGLE
ERR2205812	PRJEB23662	human gut metagenome	feces	China	Asia	‒	‒	WGS	METAGENOMIC	ILLUMINA	Illumina HiSeq 4000	SINGLE
ERR2205813	PRJEB23662	human gut metagenome	feces	China	Asia	‒	‒	WGS	METAGENOMIC	ILLUMINA	Illumina HiSeq 4000	SINGLE
ERR2205814	PRJEB23662	human gut metagenome	feces	China	Asia	‒	‒	WGS	METAGENOMIC	ILLUMINA	Illumina HiSeq 4000	SINGLE
ERR2205815	PRJEB23662	human gut metagenome	feces	China	Asia	‒	‒	WGS	METAGENOMIC	ILLUMINA	Illumina HiSeq 4000	SINGLE
ERR2205816	PRJEB23662	human gut metagenome	feces	China	Asia	‒	‒	WGS	METAGENOMIC	ILLUMINA	Illumina HiSeq 4000	SINGLE
ERR2205817	PRJEB23662	human gut metagenome	feces	China	Asia	‒	‒	WGS	METAGENOMIC	ILLUMINA	Illumina HiSeq 4000	SINGLE
ERR2205818	PRJEB23662	human gut metagenome	feces	China	Asia	‒	‒	WGS	METAGENOMIC	ILLUMINA	Illumina HiSeq 4000	SINGLE
ERR2205819	PRJEB23662	human gut metagenome	feces	China	Asia	‒	‒	WGS	METAGENOMIC	ILLUMINA	Illumina HiSeq 4000	SINGLE
ERR2205820	PRJEB23662	human gut metagenome	feces	China	Asia	‒	‒	WGS	METAGENOMIC	ILLUMINA	Illumina HiSeq 4000	SINGLE
ERR2205821	PRJEB23662	human gut metagenome	feces	China	Asia	‒	‒	WGS	METAGENOMIC	ILLUMINA	Illumina HiSeq 4000	SINGLE
ERR2205822	PRJEB23662	human gut metagenome	feces	China	Asia	‒	‒	WGS	METAGENOMIC	ILLUMINA	Illumina HiSeq 4000	SINGLE
ERR2205823	PRJEB23662	human gut metagenome	feces	China	Asia	‒	‒	WGS	METAGENOMIC	ILLUMINA	Illumina HiSeq 4000	SINGLE
ERR2205824	PRJEB23662	human gut metagenome	feces	China	Asia	‒	‒	WGS	METAGENOMIC	ILLUMINA	Illumina HiSeq 4000	SINGLE
ERR2205825	PRJEB23662	human gut metagenome	feces	China	Asia	‒	‒	WGS	METAGENOMIC	ILLUMINA	Illumina HiSeq 4000	SINGLE
ERR2205826	PRJEB23662	human gut metagenome	feces	China	Asia	‒	‒	WGS	METAGENOMIC	ILLUMINA	Illumina HiSeq 4000	SINGLE
ERR2205827	PRJEB23662	human gut metagenome	feces	China	Asia	‒	‒	WGS	METAGENOMIC	ILLUMINA	Illumina HiSeq 4000	SINGLE
ERR2205828	PRJEB23662	human gut metagenome	feces	China	Asia	‒	‒	WGS	METAGENOMIC	ILLUMINA	Illumina HiSeq 4000	SINGLE
ERR2205829	PRJEB23662	human gut metagenome	feces	China	Asia	‒	‒	WGS	METAGENOMIC	ILLUMINA	Illumina HiSeq 4000	SINGLE
ERR2205830	PRJEB23662	human gut metagenome	feces	China	Asia	‒	‒	WGS	METAGENOMIC	ILLUMINA	Illumina HiSeq 4000	SINGLE
ERR2205831	PRJEB23662	human gut metagenome	feces	China	Asia	‒	‒	WGS	METAGENOMIC	ILLUMINA	Illumina HiSeq 4000	SINGLE
ERR2205832	PRJEB23662	human gut metagenome	feces	China	Asia	‒	‒	WGS	METAGENOMIC	ILLUMINA	Illumina HiSeq 4000	SINGLE
ERR2205833	PRJEB23662	human gut metagenome	feces	China	Asia	‒	‒	WGS	METAGENOMIC	ILLUMINA	Illumina HiSeq 4000	SINGLE
ERR2205834	PRJEB23662	human gut metagenome	feces	China	Asia	‒	‒	WGS	METAGENOMIC	ILLUMINA	Illumina HiSeq 4000	SINGLE
ERR2205835	PRJEB23662	human gut metagenome	feces	China	Asia	‒	‒	WGS	METAGENOMIC	ILLUMINA	Illumina HiSeq 4000	SINGLE
ERR2205836	PRJEB23662	human gut metagenome	feces	China	Asia	‒	‒	WGS	METAGENOMIC	ILLUMINA	Illumina HiSeq 4000	SINGLE
ERR2205837	PRJEB23662	human gut metagenome	feces	China	Asia	‒	‒	WGS	METAGENOMIC	ILLUMINA	Illumina HiSeq 4000	SINGLE
ERR2205838	PRJEB23662	human gut metagenome	feces	China	Asia	‒	‒	WGS	METAGENOMIC	ILLUMINA	Illumina HiSeq 4000	SINGLE
ERR2205839	PRJEB23662	human gut metagenome	feces	China	Asia	‒	‒	WGS	METAGENOMIC	ILLUMINA	Illumina HiSeq 4000	SINGLE
ERR2205840	PRJEB23662	human gut metagenome	feces	China	Asia	‒	‒	WGS	METAGENOMIC	ILLUMINA	Illumina HiSeq 4000	SINGLE
ERR2205841	PRJEB23662	human gut metagenome	feces	China	Asia	‒	‒	WGS	METAGENOMIC	ILLUMINA	Illumina HiSeq 4000	SINGLE
ERR2205842	PRJEB23662	human gut metagenome	feces	China	Asia	‒	‒	WGS	METAGENOMIC	ILLUMINA	Illumina HiSeq 4000	SINGLE
ERR2262399	PRJEB24557	human gut metagenome	stool	Switzerland	Europe	‒	‒	WGS	METAGENOMIC	ILLUMINA	Illumina HiSeq 3000	PAIRED
ERR2262400	PRJEB24557	human gut metagenome	stool	Switzerland	Europe	‒	‒	WGS	METAGENOMIC	ILLUMINA	Illumina HiSeq 3000	PAIRED
ERR2262401	PRJEB24557	human gut metagenome	stool	Switzerland	Europe	‒	‒	WGS	METAGENOMIC	ILLUMINA	Illumina HiSeq 3000	PAIRED
ERR2262402	PRJEB24557	human gut metagenome	stool	Switzerland	Europe	‒	‒	WGS	METAGENOMIC	ILLUMINA	Illumina HiSeq 3000	PAIRED
ERR2262403	PRJEB24557	human gut metagenome	stool	Switzerland	Europe	‒	‒	WGS	METAGENOMIC	ILLUMINA	Illumina HiSeq 3000	PAIRED
ERR2262404	PRJEB24557	human gut metagenome	stool	Switzerland	Europe	‒	‒	WGS	METAGENOMIC	ILLUMINA	Illumina HiSeq 3000	PAIRED
ERR2262405	PRJEB24557	human gut metagenome	stool	Switzerland	Europe	‒	‒	WGS	METAGENOMIC	ILLUMINA	Illumina HiSeq 3000	PAIRED
ERR2262406	PRJEB24557	human gut metagenome	stool	Switzerland	Europe	‒	‒	WGS	METAGENOMIC	ILLUMINA	Illumina HiSeq 3000	PAIRED
ERR2262407	PRJEB24557	human gut metagenome	stool	Switzerland	Europe	‒	‒	WGS	METAGENOMIC	ILLUMINA	Illumina HiSeq 3000	PAIRED
ERR2262408	PRJEB24557	human gut metagenome	stool	Switzerland	Europe	‒	‒	WGS	METAGENOMIC	ILLUMINA	Illumina HiSeq 3000	PAIRED
ERR2262409	PRJEB24557	human gut metagenome	stool	Switzerland	Europe	‒	‒	WGS	METAGENOMIC	ILLUMINA	Illumina HiSeq 3000	PAIRED
ERR2262410	PRJEB24557	human gut metagenome	stool	Switzerland	Europe	‒	‒	WGS	METAGENOMIC	ILLUMINA	Illumina HiSeq 3000	PAIRED
ERR2262411	PRJEB24557	human gut metagenome	stool	Switzerland	Europe	‒	‒	WGS	METAGENOMIC	ILLUMINA	Illumina HiSeq 3000	PAIRED
ERR2262412	PRJEB24557	human gut metagenome	stool	Switzerland	Europe	‒	‒	WGS	METAGENOMIC	ILLUMINA	Illumina HiSeq 3000	PAIRED
ERR2262413	PRJEB24557	human gut metagenome	stool	Switzerland	Europe	‒	‒	WGS	METAGENOMIC	ILLUMINA	Illumina HiSeq 3000	PAIRED
ERR2262414	PRJEB24557	human gut metagenome	stool	Switzerland	Europe	‒	‒	WGS	METAGENOMIC	ILLUMINA	Illumina HiSeq 3000	PAIRED
ERR2262415	PRJEB24557	human gut metagenome	stool	Switzerland	Europe	‒	‒	WGS	METAGENOMIC	ILLUMINA	Illumina HiSeq 3000	PAIRED
ERR2262416	PRJEB24557	human gut metagenome	stool	Switzerland	Europe	‒	‒	WGS	METAGENOMIC	ILLUMINA	Illumina HiSeq 3000	PAIRED
ERR2262417	PRJEB24557	human gut metagenome	stool	Switzerland	Europe	‒	‒	WGS	METAGENOMIC	ILLUMINA	Illumina HiSeq 3000	PAIRED
ERR2262418	PRJEB24557	human gut metagenome	stool	Switzerland	Europe	‒	‒	WGS	METAGENOMIC	ILLUMINA	Illumina HiSeq 3000	PAIRED
ERR2262419	PRJEB24557	human gut metagenome	stool	Switzerland	Europe	‒	‒	WGS	METAGENOMIC	ILLUMINA	Illumina HiSeq 3000	PAIRED
ERR2262420	PRJEB24557	human gut metagenome	stool	Switzerland	Europe	‒	‒	WGS	METAGENOMIC	ILLUMINA	Illumina HiSeq 3000	PAIRED
ERR2262421	PRJEB24557	human gut metagenome	stool	Switzerland	Europe	‒	‒	WGS	METAGENOMIC	ILLUMINA	Illumina HiSeq 3000	PAIRED
ERR2262422	PRJEB24557	human gut metagenome	stool	Switzerland	Europe	‒	‒	WGS	METAGENOMIC	ILLUMINA	Illumina HiSeq 3000	PAIRED
ERR2262423	PRJEB24557	human gut metagenome	stool	Switzerland	Europe	‒	‒	WGS	METAGENOMIC	ILLUMINA	Illumina HiSeq 3000	PAIRED
ERR2262424	PRJEB24557	human gut metagenome	stool	Switzerland	Europe	‒	‒	WGS	METAGENOMIC	ILLUMINA	Illumina HiSeq 3000	PAIRED
ERR2262425	PRJEB24557	human gut metagenome	stool	Switzerland	Europe	‒	‒	WGS	METAGENOMIC	ILLUMINA	Illumina HiSeq 3000	PAIRED
ERR2262426	PRJEB24557	human gut metagenome	stool	Switzerland	Europe	‒	‒	WGS	METAGENOMIC	ILLUMINA	Illumina HiSeq 3000	PAIRED
ERR2262427	PRJEB24557	human gut metagenome	stool	Switzerland	Europe	‒	‒	WGS	METAGENOMIC	ILLUMINA	Illumina HiSeq 3000	PAIRED
ERR2262428	PRJEB24557	human gut metagenome	stool	Switzerland	Europe	‒	‒	WGS	METAGENOMIC	ILLUMINA	Illumina HiSeq 3000	PAIRED
ERR3479091	PRJEB25514	human gut metagenome	stool	Italy	Europe	‒	‒	WGS	METAGENOMIC	ILLUMINA	Illumina HiSeq X Ten	PAIRED
ERR3501987	PRJEB25514	human gut metagenome	stool	Italy	Europe	‒	‒	WGS	METAGENOMIC	ILLUMINA	HiSeq X Ten	PAIRED
ERR3501988	PRJEB25514	human gut metagenome	stool	Italy	Europe	‒	‒	WGS	METAGENOMIC	ILLUMINA	HiSeq X Ten	PAIRED
ERR3501989	PRJEB25514	human gut metagenome	stool	Italy	Europe	‒	‒	WGS	METAGENOMIC	ILLUMINA	HiSeq X Ten	PAIRED
ERR3501990	PRJEB25514	human gut metagenome	stool	Italy	Europe	‒	‒	WGS	METAGENOMIC	ILLUMINA	HiSeq X Ten	PAIRED
ERR3501991	PRJEB25514	human gut metagenome	stool	Italy	Europe	‒	‒	WGS	METAGENOMIC	ILLUMINA	HiSeq X Ten	PAIRED
ERR3501992	PRJEB25514	human gut metagenome	stool	Italy	Europe	‒	‒	WGS	METAGENOMIC	ILLUMINA	HiSeq X Ten	PAIRED
ERR3501993	PRJEB25514	human gut metagenome	stool	Italy	Europe	‒	‒	WGS	METAGENOMIC	ILLUMINA	HiSeq X Ten	PAIRED
ERR3501994	PRJEB25514	human gut metagenome	stool	Italy	Europe	‒	‒	WGS	METAGENOMIC	ILLUMINA	HiSeq X Ten	PAIRED
ERR3501995	PRJEB25514	human gut metagenome	stool	Italy	Europe	‒	‒	WGS	METAGENOMIC	ILLUMINA	HiSeq X Ten	PAIRED
ERR3501996	PRJEB25514	human gut metagenome	stool	Italy	Europe	‒	‒	WGS	METAGENOMIC	ILLUMINA	HiSeq X Ten	PAIRED
ERR3501997	PRJEB25514	human gut metagenome	stool	Italy	Europe	‒	‒	WGS	METAGENOMIC	ILLUMINA	HiSeq X Ten	PAIRED
ERR3501998	PRJEB25514	human gut metagenome	stool	Italy	Europe	‒	‒	WGS	METAGENOMIC	ILLUMINA	HiSeq X Ten	PAIRED
ERR3501999	PRJEB25514	human gut metagenome	stool	Italy	Europe	‒	‒	WGS	METAGENOMIC	ILLUMINA	HiSeq X Ten	PAIRED
ERR3502000	PRJEB25514	human gut metagenome	stool	Italy	Europe	‒	‒	WGS	METAGENOMIC	ILLUMINA	HiSeq X Ten	PAIRED
ERR3502001	PRJEB25514	human gut metagenome	stool	Italy	Europe	‒	‒	WGS	METAGENOMIC	ILLUMINA	HiSeq X Ten	PAIRED
ERR3502002	PRJEB25514	human gut metagenome	stool	Italy	Europe	‒	‒	WGS	METAGENOMIC	ILLUMINA	HiSeq X Ten	PAIRED
ERR3502003	PRJEB25514	human gut metagenome	stool	Italy	Europe	‒	‒	WGS	METAGENOMIC	ILLUMINA	HiSeq X Ten	PAIRED
ERR3502004	PRJEB25514	human gut metagenome	stool	Italy	Europe	‒	‒	WGS	METAGENOMIC	ILLUMINA	HiSeq X Ten	PAIRED
ERR3502005	PRJEB25514	human gut metagenome	stool	Italy	Europe	‒	‒	WGS	METAGENOMIC	ILLUMINA	HiSeq X Ten	PAIRED
ERR3502006	PRJEB25514	human gut metagenome	stool	Italy	Europe	‒	‒	WGS	METAGENOMIC	ILLUMINA	HiSeq X Ten	PAIRED
ERR3502007	PRJEB25514	human gut metagenome	stool	Italy	Europe	‒	‒	WGS	METAGENOMIC	ILLUMINA	HiSeq X Ten	PAIRED
ERR3502008	PRJEB25514	human gut metagenome	stool	Italy	Europe	‒	‒	WGS	METAGENOMIC	ILLUMINA	HiSeq X Ten	PAIRED
ERR3502009	PRJEB25514	human gut metagenome	stool	Italy	Europe	‒	‒	WGS	METAGENOMIC	ILLUMINA	HiSeq X Ten	PAIRED
ERR3502010	PRJEB25514	human gut metagenome	stool	Italy	Europe	‒	‒	WGS	METAGENOMIC	ILLUMINA	HiSeq X Ten	PAIRED
ERR3502011	PRJEB25514	human gut metagenome	stool	Italy	Europe	‒	‒	WGS	METAGENOMIC	ILLUMINA	HiSeq X Ten	PAIRED
ERR3502012	PRJEB25514	human gut metagenome	stool	Italy	Europe	‒	‒	WGS	METAGENOMIC	ILLUMINA	HiSeq X Ten	PAIRED
ERR3502013	PRJEB25514	human gut metagenome	stool	Italy	Europe	‒	‒	WGS	METAGENOMIC	ILLUMINA	HiSeq X Ten	PAIRED
ERR3502014	PRJEB25514	human gut metagenome	stool	Italy	Europe	‒	‒	WGS	METAGENOMIC	ILLUMINA	HiSeq X Ten	PAIRED
ERR3502015	PRJEB25514	human gut metagenome	stool	Italy	Europe	‒	‒	WGS	METAGENOMIC	ILLUMINA	HiSeq X Ten	PAIRED
ERR3502016	PRJEB25514	human gut metagenome	stool	Italy	Europe	‒	‒	WGS	METAGENOMIC	ILLUMINA	HiSeq X Ten	PAIRED
ERR3502017	PRJEB25514	human gut metagenome	stool	Italy	Europe	‒	‒	WGS	METAGENOMIC	ILLUMINA	HiSeq X Ten	PAIRED
ERR3502018	PRJEB25514	human gut metagenome	stool	Italy	Europe	‒	‒	WGS	METAGENOMIC	ILLUMINA	HiSeq X Ten	PAIRED
ERR3502019	PRJEB25514	human gut metagenome	stool	Italy	Europe	‒	‒	WGS	METAGENOMIC	ILLUMINA	HiSeq X Ten	PAIRED
ERR3502020	PRJEB25514	human gut metagenome	stool	Italy	Europe	‒	‒	WGS	METAGENOMIC	ILLUMINA	HiSeq X Ten	PAIRED
ERR3502021	PRJEB25514	human gut metagenome	stool	Italy	Europe	‒	‒	WGS	METAGENOMIC	ILLUMINA	HiSeq X Ten	PAIRED
ERR3502022	PRJEB25514	human gut metagenome	stool	Italy	Europe	‒	‒	WGS	METAGENOMIC	ILLUMINA	HiSeq X Ten	PAIRED
ERR3502023	PRJEB25514	human gut metagenome	stool	Italy	Europe	‒	‒	WGS	METAGENOMIC	ILLUMINA	HiSeq X Ten	PAIRED
ERR3502024	PRJEB25514	human gut metagenome	stool	Italy	Europe	‒	‒	WGS	METAGENOMIC	ILLUMINA	HiSeq X Ten	PAIRED
ERR3502025	PRJEB25514	human gut metagenome	stool	Italy	Europe	‒	‒	WGS	METAGENOMIC	ILLUMINA	HiSeq X Ten	PAIRED
ERR3502026	PRJEB25514	human gut metagenome	stool	Italy	Europe	‒	‒	WGS	METAGENOMIC	ILLUMINA	HiSeq X Ten	PAIRED
ERR3502027	PRJEB25514	human gut metagenome	stool	Italy	Europe	‒	‒	WGS	METAGENOMIC	ILLUMINA	HiSeq X Ten	PAIRED
ERR3502028	PRJEB25514	human gut metagenome	stool	Italy	Europe	‒	‒	WGS	METAGENOMIC	ILLUMINA	HiSeq X Ten	PAIRED
ERR3502029	PRJEB25514	human gut metagenome	stool	Italy	Europe	‒	‒	WGS	METAGENOMIC	ILLUMINA	HiSeq X Ten	PAIRED
ERR2391214	PRJEB25514	human gut metagenome	stool	Italy	Europe	‒	‒	WGS	METAGENOMIC	ILLUMINA	Illumina HiSeq X Ten	PAIRED
ERR2391216	PRJEB25514	human gut metagenome	stool	Italy	Europe	‒	‒	WGS	METAGENOMIC	ILLUMINA	Illumina HiSeq X Ten	PAIRED
ERR2391217	PRJEB25514	human gut metagenome	stool	Italy	Europe	‒	‒	WGS	METAGENOMIC	ILLUMINA	Illumina HiSeq X Ten	PAIRED
ERR2391218	PRJEB25514	human gut metagenome	stool	Italy	Europe	‒	‒	WGS	METAGENOMIC	ILLUMINA	Illumina HiSeq X Ten	PAIRED
ERR2391219	PRJEB25514	human gut metagenome	stool	Italy	Europe	‒	‒	WGS	METAGENOMIC	ILLUMINA	Illumina HiSeq X Ten	PAIRED
ERR2391220	PRJEB25514	human gut metagenome	stool	Italy	Europe	‒	‒	WGS	METAGENOMIC	ILLUMINA	Illumina HiSeq X Ten	PAIRED
ERR2391226	PRJEB25514	human gut metagenome	stool	Italy	Europe	‒	‒	WGS	METAGENOMIC	ILLUMINA	Illumina HiSeq X Ten	PAIRED
ERR2391227	PRJEB25514	human gut metagenome	stool	Italy	Europe	‒	‒	WGS	METAGENOMIC	ILLUMINA	Illumina HiSeq X Ten	PAIRED
ERR2391215	PRJEB25514	human gut metagenome	stool	Italy	Europe	‒	‒	WGS	METAGENOMIC	ILLUMINA	Illumina HiSeq X Ten	PAIRED
ERR2391221	PRJEB25514	human gut metagenome	stool	Italy	Europe	‒	‒	WGS	METAGENOMIC	ILLUMINA	Illumina HiSeq X Ten	PAIRED
ERR2391222	PRJEB25514	human gut metagenome	stool	Italy	Europe	‒	‒	WGS	METAGENOMIC	ILLUMINA	Illumina HiSeq X Ten	PAIRED
ERR2391223	PRJEB25514	human gut metagenome	stool	Italy	Europe	‒	‒	WGS	METAGENOMIC	ILLUMINA	Illumina HiSeq X Ten	PAIRED
ERR2391224	PRJEB25514	human gut metagenome	stool	Italy	Europe	‒	‒	WGS	METAGENOMIC	ILLUMINA	Illumina HiSeq X Ten	PAIRED
ERR2391225	PRJEB25514	human gut metagenome	stool	Italy	Europe	‒	‒	WGS	METAGENOMIC	ILLUMINA	Illumina HiSeq X Ten	PAIRED
ERR2391228	PRJEB25514	human gut metagenome	stool	Italy	Europe	‒	‒	WGS	METAGENOMIC	ILLUMINA	Illumina HiSeq X Ten	PAIRED
ERR2753098	PRJEB28338	human gut metagenome	feces	Ireland	Europe	‒	male	WGS	METAGENOMIC	ILLUMINA	NextSeq 500	PAIRED
ERR2753099	PRJEB28338	human gut metagenome	feces	Ireland	Europe	‒	male	WGS	METAGENOMIC	ILLUMINA	NextSeq 500	PAIRED
ERR2753100	PRJEB28338	human gut metagenome	feces	Ireland	Europe	‒	male	WGS	METAGENOMIC	ILLUMINA	NextSeq 500	PAIRED
ERR2753101	PRJEB28338	human gut metagenome	feces	Ireland	Europe	‒	male	WGS	METAGENOMIC	ILLUMINA	NextSeq 500	PAIRED
ERR3021272	PRJEB28384	human gut metagenome	feces	China	Asia	‒	‒	WGS	METAGENOMIC	ILLUMINA	Illumina HiSeq 4000	PAIRED
ERR3021273	PRJEB28384	human gut metagenome	feces	China	Asia	‒	‒	WGS	METAGENOMIC	ILLUMINA	Illumina HiSeq 4000	PAIRED
ERR3021274	PRJEB28384	human gut metagenome	feces	China	Asia	‒	‒	WGS	METAGENOMIC	ILLUMINA	Illumina HiSeq 4000	PAIRED
ERR3021275	PRJEB28384	human gut metagenome	feces	China	Asia	‒	‒	WGS	METAGENOMIC	ILLUMINA	Illumina HiSeq 4000	PAIRED
ERR3021276	PRJEB28384	human gut metagenome	feces	China	Asia	‒	‒	WGS	METAGENOMIC	ILLUMINA	Illumina HiSeq 4000	PAIRED
ERR3021277	PRJEB28384	human gut metagenome	feces	China	Asia	‒	‒	WGS	METAGENOMIC	ILLUMINA	Illumina HiSeq 4000	PAIRED
ERR3021278	PRJEB28384	human gut metagenome	feces	China	Asia	‒	‒	WGS	METAGENOMIC	ILLUMINA	Illumina HiSeq 4000	PAIRED
ERR3021279	PRJEB28384	human gut metagenome	feces	China	Asia	‒	‒	WGS	METAGENOMIC	ILLUMINA	Illumina HiSeq 4000	PAIRED
ERR3021280	PRJEB28384	human gut metagenome	feces	China	Asia	‒	‒	WGS	METAGENOMIC	ILLUMINA	Illumina HiSeq 4000	PAIRED
ERR3021281	PRJEB28384	human gut metagenome	feces	China	Asia	‒	‒	WGS	METAGENOMIC	ILLUMINA	Illumina HiSeq 4000	PAIRED
ERR3021282	PRJEB28384	human gut metagenome	feces	China	Asia	‒	‒	WGS	METAGENOMIC	ILLUMINA	Illumina HiSeq 4000	PAIRED
ERR3021283	PRJEB28384	human gut metagenome	feces	China	Asia	‒	‒	WGS	METAGENOMIC	ILLUMINA	Illumina HiSeq 4000	PAIRED
ERR3021284	PRJEB28384	human gut metagenome	feces	China	Asia	‒	‒	WGS	METAGENOMIC	ILLUMINA	Illumina HiSeq 4000	PAIRED
ERR3021285	PRJEB28384	human gut metagenome	feces	China	Asia	‒	‒	WGS	METAGENOMIC	ILLUMINA	Illumina HiSeq 4000	PAIRED
ERR3021286	PRJEB28384	human gut metagenome	feces	China	Asia	‒	‒	WGS	METAGENOMIC	ILLUMINA	Illumina HiSeq 4000	PAIRED
ERR3021287	PRJEB28384	human gut metagenome	feces	China	Asia	‒	‒	WGS	METAGENOMIC	ILLUMINA	Illumina HiSeq 4000	PAIRED
ERR3021288	PRJEB28384	human gut metagenome	feces	China	Asia	‒	‒	WGS	METAGENOMIC	ILLUMINA	Illumina HiSeq 4000	PAIRED
ERR3021289	PRJEB28384	human gut metagenome	feces	China	Asia	‒	‒	WGS	METAGENOMIC	ILLUMINA	Illumina HiSeq 4000	PAIRED
ERR3021290	PRJEB28384	human gut metagenome	feces	China	Asia	‒	‒	WGS	METAGENOMIC	ILLUMINA	Illumina HiSeq 4000	PAIRED
ERR3021291	PRJEB28384	human gut metagenome	feces	China	Asia	‒	‒	WGS	METAGENOMIC	ILLUMINA	Illumina HiSeq 4000	PAIRED
ERR3021292	PRJEB28384	human gut metagenome	feces	China	Asia	‒	‒	WGS	METAGENOMIC	ILLUMINA	Illumina HiSeq 4000	PAIRED
ERR3021293	PRJEB28384	human gut metagenome	feces	China	Asia	‒	‒	WGS	METAGENOMIC	ILLUMINA	Illumina HiSeq 4000	PAIRED
ERR3021294	PRJEB28384	human gut metagenome	feces	China	Asia	‒	‒	WGS	METAGENOMIC	ILLUMINA	Illumina HiSeq 4000	PAIRED
ERR3021295	PRJEB28384	human gut metagenome	feces	China	Asia	‒	‒	WGS	METAGENOMIC	ILLUMINA	Illumina HiSeq 4000	PAIRED
ERR3021296	PRJEB28384	human gut metagenome	feces	China	Asia	‒	‒	WGS	METAGENOMIC	ILLUMINA	Illumina HiSeq 4000	PAIRED
ERR3021297	PRJEB28384	human gut metagenome	feces	China	Asia	‒	‒	WGS	METAGENOMIC	ILLUMINA	Illumina HiSeq 4000	PAIRED
ERR3021298	PRJEB28384	human gut metagenome	feces	China	Asia	‒	‒	WGS	METAGENOMIC	ILLUMINA	Illumina HiSeq 4000	PAIRED
ERR3021299	PRJEB28384	human gut metagenome	feces	China	Asia	‒	‒	WGS	METAGENOMIC	ILLUMINA	Illumina HiSeq 4000	PAIRED
ERR3021300	PRJEB28384	human gut metagenome	feces	China	Asia	‒	‒	WGS	METAGENOMIC	ILLUMINA	Illumina HiSeq 4000	PAIRED
ERR3021301	PRJEB28384	human gut metagenome	feces	China	Asia	‒	‒	WGS	METAGENOMIC	ILLUMINA	Illumina HiSeq 4000	PAIRED
ERR3021302	PRJEB28384	human gut metagenome	feces	China	Asia	‒	‒	WGS	METAGENOMIC	ILLUMINA	Illumina HiSeq 4000	PAIRED
ERR3021303	PRJEB28384	human gut metagenome	feces	China	Asia	‒	‒	WGS	METAGENOMIC	ILLUMINA	Illumina HiSeq 4000	PAIRED
ERR3021304	PRJEB28384	human gut metagenome	feces	China	Asia	‒	‒	WGS	METAGENOMIC	ILLUMINA	Illumina HiSeq 4000	PAIRED
ERR3021305	PRJEB28384	human gut metagenome	feces	China	Asia	‒	‒	WGS	METAGENOMIC	ILLUMINA	Illumina HiSeq 4000	PAIRED
ERR3021306	PRJEB28384	human gut metagenome	feces	China	Asia	‒	‒	WGS	METAGENOMIC	ILLUMINA	Illumina HiSeq 4000	PAIRED
ERR3021307	PRJEB28384	human gut metagenome	feces	China	Asia	‒	‒	WGS	METAGENOMIC	ILLUMINA	Illumina HiSeq 4000	PAIRED
ERR3021308	PRJEB28384	human gut metagenome	feces	China	Asia	‒	‒	WGS	METAGENOMIC	ILLUMINA	Illumina HiSeq 4000	PAIRED
ERR3021309	PRJEB28384	human gut metagenome	feces	China	Asia	‒	‒	WGS	METAGENOMIC	ILLUMINA	Illumina HiSeq 4000	PAIRED
ERR3021310	PRJEB28384	human gut metagenome	feces	China	Asia	‒	‒	WGS	METAGENOMIC	ILLUMINA	Illumina HiSeq 4000	PAIRED
ERR3021311	PRJEB28384	human gut metagenome	feces	China	Asia	‒	‒	WGS	METAGENOMIC	ILLUMINA	Illumina HiSeq 4000	PAIRED
ERR3021312	PRJEB28384	human gut metagenome	feces	China	Asia	‒	‒	WGS	METAGENOMIC	ILLUMINA	Illumina HiSeq 4000	PAIRED
ERR3021313	PRJEB28384	human gut metagenome	feces	China	Asia	‒	‒	WGS	METAGENOMIC	ILLUMINA	Illumina HiSeq 4000	PAIRED
ERR3021314	PRJEB28384	human gut metagenome	feces	China	Asia	‒	‒	WGS	METAGENOMIC	ILLUMINA	Illumina HiSeq 4000	PAIRED
ERR3021315	PRJEB28384	human gut metagenome	feces	China	Asia	‒	‒	WGS	METAGENOMIC	ILLUMINA	Illumina HiSeq 4000	PAIRED
ERR3021316	PRJEB28384	human gut metagenome	feces	China	Asia	‒	‒	WGS	METAGENOMIC	ILLUMINA	Illumina HiSeq 4000	PAIRED
ERR3021317	PRJEB28384	human gut metagenome	feces	China	Asia	‒	‒	WGS	METAGENOMIC	ILLUMINA	Illumina HiSeq 4000	PAIRED
ERR3021318	PRJEB28384	human gut metagenome	feces	China	Asia	‒	‒	WGS	METAGENOMIC	ILLUMINA	Illumina HiSeq 4000	PAIRED
ERR3021319	PRJEB28384	human gut metagenome	feces	China	Asia	‒	‒	WGS	METAGENOMIC	ILLUMINA	Illumina HiSeq 4000	PAIRED
ERR3021320	PRJEB28384	human gut metagenome	feces	China	Asia	‒	‒	WGS	METAGENOMIC	ILLUMINA	Illumina HiSeq 4000	PAIRED
ERR3021321	PRJEB28384	human gut metagenome	feces	China	Asia	‒	‒	WGS	METAGENOMIC	ILLUMINA	Illumina HiSeq 4000	PAIRED
ERR3597792	PRJEB30924	human gut metagenome	feces	Germany	Europe	‒	‒	WGS	METAGENOMIC	ILLUMINA	NextSeq 500	PAIRED
ERR3597796	PRJEB30924	human gut metagenome	feces	Germany	Europe	‒	‒	WGS	METAGENOMIC	ILLUMINA	NextSeq 500	PAIRED
ERR3597808	PRJEB30924	human gut metagenome	feces	Germany	Europe	‒	‒	WGS	METAGENOMIC	ILLUMINA	NextSeq 500	PAIRED
ERR3597812	PRJEB30924	human gut metagenome	feces	Germany	Europe	‒	‒	WGS	METAGENOMIC	ILLUMINA	NextSeq 500	PAIRED
ERR3607252	PRJEB33013	human gut metagenome	feces	South Korea	Asia	‒	‒	WGS	METAGENOMIC	ILLUMINA	Illumina HiSeq 4000	PAIRED
ERR3607253	PRJEB33013	human gut metagenome	feces	South Korea	Asia	‒	‒	WGS	METAGENOMIC	ILLUMINA	Illumina HiSeq 4000	PAIRED
ERR3607254	PRJEB33013	human gut metagenome	feces	South Korea	Asia	‒	‒	WGS	METAGENOMIC	ILLUMINA	Illumina HiSeq 4000	PAIRED
ERR3607255	PRJEB33013	human gut metagenome	feces	South Korea	Asia	‒	‒	WGS	METAGENOMIC	ILLUMINA	Illumina HiSeq 4000	PAIRED
ERR3607256	PRJEB33013	human gut metagenome	feces	South Korea	Asia	‒	‒	WGS	METAGENOMIC	ILLUMINA	Illumina HiSeq 4000	PAIRED
ERR3607257	PRJEB33013	human gut metagenome	feces	South Korea	Asia	‒	‒	WGS	METAGENOMIC	ILLUMINA	Illumina HiSeq 4000	PAIRED
ERR3607258	PRJEB33013	human gut metagenome	feces	South Korea	Asia	‒	‒	WGS	METAGENOMIC	ILLUMINA	Illumina HiSeq 4000	PAIRED
ERR3607259	PRJEB33013	human gut metagenome	feces	South Korea	Asia	‒	‒	WGS	METAGENOMIC	ILLUMINA	Illumina HiSeq 4000	PAIRED
ERR3607260	PRJEB33013	human gut metagenome	feces	South Korea	Asia	‒	‒	WGS	METAGENOMIC	ILLUMINA	Illumina HiSeq 4000	PAIRED
ERR3607261	PRJEB33013	human gut metagenome	feces	South Korea	Asia	‒	‒	WGS	METAGENOMIC	ILLUMINA	Illumina HiSeq 4000	PAIRED
ERR3607262	PRJEB33013	human gut metagenome	feces	South Korea	Asia	‒	‒	WGS	METAGENOMIC	ILLUMINA	Illumina HiSeq 4000	PAIRED
ERR3607263	PRJEB33013	human gut metagenome	feces	South Korea	Asia	‒	‒	WGS	METAGENOMIC	ILLUMINA	Illumina HiSeq 4000	PAIRED
ERR3607264	PRJEB33013	human gut metagenome	feces	South Korea	Asia	‒	‒	WGS	METAGENOMIC	ILLUMINA	Illumina HiSeq 4000	PAIRED
ERR3607265	PRJEB33013	human gut metagenome	feces	South Korea	Asia	‒	‒	WGS	METAGENOMIC	ILLUMINA	Illumina HiSeq 4000	PAIRED
ERR3607266	PRJEB33013	human gut metagenome	feces	South Korea	Asia	‒	‒	WGS	METAGENOMIC	ILLUMINA	Illumina HiSeq 4000	PAIRED
ERR3607267	PRJEB33013	human gut metagenome	feces	South Korea	Asia	‒	‒	WGS	METAGENOMIC	ILLUMINA	Illumina HiSeq 4000	PAIRED
ERR3607268	PRJEB33013	human gut metagenome	feces	South Korea	Asia	‒	‒	WGS	METAGENOMIC	ILLUMINA	Illumina HiSeq 4000	PAIRED
ERR3607269	PRJEB33013	human gut metagenome	feces	South Korea	Asia	‒	‒	WGS	METAGENOMIC	ILLUMINA	Illumina HiSeq 4000	PAIRED
ERR3607270	PRJEB33013	human gut metagenome	feces	South Korea	Asia	‒	‒	WGS	METAGENOMIC	ILLUMINA	Illumina HiSeq 4000	PAIRED
ERR3607271	PRJEB33013	human gut metagenome	feces	South Korea	Asia	‒	‒	WGS	METAGENOMIC	ILLUMINA	Illumina HiSeq 4000	PAIRED
ERR3607272	PRJEB33013	human gut metagenome	feces	South Korea	Asia	‒	‒	WGS	METAGENOMIC	ILLUMINA	Illumina HiSeq 4000	PAIRED
ERR3607273	PRJEB33013	human gut metagenome	feces	South Korea	Asia	‒	‒	WGS	METAGENOMIC	ILLUMINA	Illumina HiSeq 4000	PAIRED
ERR3607274	PRJEB33013	human gut metagenome	feces	South Korea	Asia	‒	‒	WGS	METAGENOMIC	ILLUMINA	Illumina HiSeq 4000	PAIRED
ERR3607275	PRJEB33013	human gut metagenome	feces	South Korea	Asia	‒	‒	WGS	METAGENOMIC	ILLUMINA	Illumina HiSeq 4000	PAIRED
ERR3607276	PRJEB33013	human gut metagenome	feces	South Korea	Asia	‒	‒	WGS	METAGENOMIC	ILLUMINA	Illumina HiSeq 4000	PAIRED
ERR3607277	PRJEB33013	human gut metagenome	feces	South Korea	Asia	‒	‒	WGS	METAGENOMIC	ILLUMINA	Illumina HiSeq 4000	PAIRED
ERR3607278	PRJEB33013	human gut metagenome	feces	South Korea	Asia	‒	‒	WGS	METAGENOMIC	ILLUMINA	Illumina HiSeq 4000	PAIRED
ERR3607279	PRJEB33013	human gut metagenome	feces	South Korea	Asia	‒	‒	WGS	METAGENOMIC	ILLUMINA	Illumina HiSeq 4000	PAIRED
ERR3607280	PRJEB33013	human gut metagenome	feces	South Korea	Asia	‒	‒	WGS	METAGENOMIC	ILLUMINA	Illumina HiSeq 4000	PAIRED
ERR3607281	PRJEB33013	human gut metagenome	feces	South Korea	Asia	‒	‒	WGS	METAGENOMIC	ILLUMINA	Illumina HiSeq 4000	PAIRED
ERR3607282	PRJEB33013	human gut metagenome	feces	South Korea	Asia	‒	‒	WGS	METAGENOMIC	ILLUMINA	Illumina HiSeq 4000	PAIRED
ERR3607283	PRJEB33013	human gut metagenome	feces	South Korea	Asia	‒	‒	WGS	METAGENOMIC	ILLUMINA	Illumina HiSeq 4000	PAIRED
ERR3607284	PRJEB33013	human gut metagenome	feces	South Korea	Asia	‒	‒	WGS	METAGENOMIC	ILLUMINA	Illumina HiSeq 4000	PAIRED
ERR3607285	PRJEB33013	human gut metagenome	feces	South Korea	Asia	‒	‒	WGS	METAGENOMIC	ILLUMINA	Illumina HiSeq 4000	PAIRED
ERR3607286	PRJEB33013	human gut metagenome	feces	South Korea	Asia	‒	‒	WGS	METAGENOMIC	ILLUMINA	Illumina HiSeq 4000	PAIRED
ERR3607287	PRJEB33013	human gut metagenome	feces	South Korea	Asia	‒	‒	WGS	METAGENOMIC	ILLUMINA	Illumina HiSeq 4000	PAIRED
ERR3607288	PRJEB33013	human gut metagenome	feces	South Korea	Asia	‒	‒	WGS	METAGENOMIC	ILLUMINA	Illumina HiSeq 4000	PAIRED
ERR3607289	PRJEB33013	human gut metagenome	feces	South Korea	Asia	‒	‒	WGS	METAGENOMIC	ILLUMINA	Illumina HiSeq 4000	PAIRED
ERR3607290	PRJEB33013	human gut metagenome	feces	South Korea	Asia	‒	‒	WGS	METAGENOMIC	ILLUMINA	Illumina HiSeq 4000	PAIRED
ERR3607291	PRJEB33013	human gut metagenome	feces	South Korea	Asia	‒	‒	WGS	METAGENOMIC	ILLUMINA	Illumina HiSeq 4000	PAIRED
ERR3607292	PRJEB33013	human gut metagenome	feces	South Korea	Asia	‒	‒	WGS	METAGENOMIC	ILLUMINA	Illumina HiSeq 4000	PAIRED
ERR3607293	PRJEB33013	human gut metagenome	feces	South Korea	Asia	‒	‒	WGS	METAGENOMIC	ILLUMINA	Illumina HiSeq 4000	PAIRED
ERR3607294	PRJEB33013	human gut metagenome	feces	South Korea	Asia	‒	‒	WGS	METAGENOMIC	ILLUMINA	Illumina HiSeq 4000	PAIRED
ERR3607295	PRJEB33013	human gut metagenome	feces	South Korea	Asia	‒	‒	WGS	METAGENOMIC	ILLUMINA	Illumina HiSeq 4000	PAIRED
ERR3607296	PRJEB33013	human gut metagenome	feces	South Korea	Asia	‒	‒	WGS	METAGENOMIC	ILLUMINA	Illumina HiSeq 4000	PAIRED
ERR3607297	PRJEB33013	human gut metagenome	feces	South Korea	Asia	‒	‒	WGS	METAGENOMIC	ILLUMINA	Illumina HiSeq 4000	PAIRED
ERR3607298	PRJEB33013	human gut metagenome	feces	South Korea	Asia	‒	‒	WGS	METAGENOMIC	ILLUMINA	Illumina HiSeq 4000	PAIRED
ERR3607299	PRJEB33013	human gut metagenome	feces	South Korea	Asia	‒	‒	WGS	METAGENOMIC	ILLUMINA	Illumina HiSeq 4000	PAIRED
ERR3607300	PRJEB33013	human gut metagenome	feces	South Korea	Asia	‒	‒	WGS	METAGENOMIC	ILLUMINA	Illumina HiSeq 4000	PAIRED
ERR3607301	PRJEB33013	human gut metagenome	feces	South Korea	Asia	‒	‒	WGS	METAGENOMIC	ILLUMINA	Illumina HiSeq 4000	PAIRED
ERR3607302	PRJEB33013	human gut metagenome	feces	South Korea	Asia	‒	‒	WGS	METAGENOMIC	ILLUMINA	Illumina HiSeq 4000	PAIRED
ERR3607303	PRJEB33013	human gut metagenome	feces	South Korea	Asia	‒	‒	WGS	METAGENOMIC	ILLUMINA	Illumina HiSeq 4000	PAIRED
ERR3607304	PRJEB33013	human gut metagenome	feces	South Korea	Asia	‒	‒	WGS	METAGENOMIC	ILLUMINA	Illumina HiSeq 4000	PAIRED
ERR3607305	PRJEB33013	human gut metagenome	feces	South Korea	Asia	‒	‒	WGS	METAGENOMIC	ILLUMINA	Illumina HiSeq 4000	PAIRED
ERR3607306	PRJEB33013	human gut metagenome	feces	South Korea	Asia	‒	‒	WGS	METAGENOMIC	ILLUMINA	Illumina HiSeq 4000	PAIRED
ERR3607307	PRJEB33013	human gut metagenome	feces	South Korea	Asia	‒	‒	WGS	METAGENOMIC	ILLUMINA	Illumina HiSeq 4000	PAIRED
ERR3607308	PRJEB33013	human gut metagenome	feces	South Korea	Asia	‒	‒	WGS	METAGENOMIC	ILLUMINA	Illumina HiSeq 4000	PAIRED
ERR3607309	PRJEB33013	human gut metagenome	feces	South Korea	Asia	‒	‒	WGS	METAGENOMIC	ILLUMINA	Illumina HiSeq 4000	PAIRED
ERR3607310	PRJEB33013	human gut metagenome	feces	South Korea	Asia	‒	‒	WGS	METAGENOMIC	ILLUMINA	Illumina HiSeq 4000	PAIRED
ERR3607311	PRJEB33013	human gut metagenome	feces	South Korea	Asia	‒	‒	WGS	METAGENOMIC	ILLUMINA	Illumina HiSeq 4000	PAIRED
ERR3607312	PRJEB33013	human gut metagenome	feces	South Korea	Asia	‒	‒	WGS	METAGENOMIC	ILLUMINA	Illumina HiSeq 4000	PAIRED
ERR3698110	PRJEB35615	human gut metagenome	stool	Switzerland	Europe	‒	‒	WGS	METAGENOMIC	ILLUMINA	Illumina HiSeq 3000	PAIRED
ERR3698111	PRJEB35615	human gut metagenome	stool	Switzerland	Europe	‒	‒	WGS	METAGENOMIC	ILLUMINA	Illumina HiSeq 3000	PAIRED
ERR3698112	PRJEB35615	human gut metagenome	stool	Switzerland	Europe	‒	‒	WGS	METAGENOMIC	ILLUMINA	Illumina HiSeq 3000	PAIRED
ERR3698113	PRJEB35615	human gut metagenome	stool	Switzerland	Europe	‒	‒	WGS	METAGENOMIC	ILLUMINA	Illumina HiSeq 3000	PAIRED
ERR3698114	PRJEB35615	human gut metagenome	stool	Switzerland	Europe	‒	‒	WGS	METAGENOMIC	ILLUMINA	Illumina HiSeq 3000	PAIRED
ERR3698115	PRJEB35615	human gut metagenome	stool	Switzerland	Europe	‒	‒	WGS	METAGENOMIC	ILLUMINA	Illumina HiSeq 3000	PAIRED
ERR3698116	PRJEB35615	human gut metagenome	stool	Switzerland	Europe	‒	‒	WGS	METAGENOMIC	ILLUMINA	Illumina HiSeq 3000	PAIRED
ERR3698117	PRJEB35615	human gut metagenome	stool	Switzerland	Europe	‒	‒	WGS	METAGENOMIC	ILLUMINA	Illumina HiSeq 3000	PAIRED
ERR3698118	PRJEB35615	human gut metagenome	stool	Switzerland	Europe	‒	‒	WGS	METAGENOMIC	ILLUMINA	Illumina HiSeq 3000	PAIRED
ERR3698119	PRJEB35615	human gut metagenome	stool	Switzerland	Europe	‒	‒	WGS	METAGENOMIC	ILLUMINA	Illumina HiSeq 3000	PAIRED
ERR3698120	PRJEB35615	human gut metagenome	stool	Switzerland	Europe	‒	‒	WGS	METAGENOMIC	ILLUMINA	Illumina HiSeq 3000	PAIRED
ERR3698121	PRJEB35615	human gut metagenome	stool	Switzerland	Europe	‒	‒	WGS	METAGENOMIC	ILLUMINA	Illumina HiSeq 3000	PAIRED
ERR3698122	PRJEB35615	human gut metagenome	stool	Switzerland	Europe	‒	‒	WGS	METAGENOMIC	ILLUMINA	Illumina HiSeq 3000	PAIRED
ERR3698123	PRJEB35615	human gut metagenome	stool	Switzerland	Europe	‒	‒	WGS	METAGENOMIC	ILLUMINA	Illumina HiSeq 3000	PAIRED
ERR3698124	PRJEB35615	human gut metagenome	stool	Switzerland	Europe	‒	‒	WGS	METAGENOMIC	ILLUMINA	Illumina HiSeq 3000	PAIRED
ERR3698125	PRJEB35615	human gut metagenome	stool	Switzerland	Europe	‒	‒	WGS	METAGENOMIC	ILLUMINA	Illumina HiSeq 3000	PAIRED
ERR3698126	PRJEB35615	human gut metagenome	stool	Switzerland	Europe	‒	‒	WGS	METAGENOMIC	ILLUMINA	Illumina HiSeq 3000	PAIRED
ERR3698127	PRJEB35615	human gut metagenome	stool	Switzerland	Europe	‒	‒	WGS	METAGENOMIC	ILLUMINA	Illumina HiSeq 3000	PAIRED
ERR3698128	PRJEB35615	human gut metagenome	stool	Switzerland	Europe	‒	‒	WGS	METAGENOMIC	ILLUMINA	Illumina HiSeq 3000	PAIRED
ERR3698129	PRJEB35615	human gut metagenome	stool	Switzerland	Europe	‒	‒	WGS	METAGENOMIC	ILLUMINA	Illumina HiSeq 3000	PAIRED
ERR3698130	PRJEB35615	human gut metagenome	stool	Switzerland	Europe	‒	‒	WGS	METAGENOMIC	ILLUMINA	Illumina HiSeq 3000	PAIRED
ERR3698131	PRJEB35615	human gut metagenome	stool	Switzerland	Europe	‒	‒	WGS	METAGENOMIC	ILLUMINA	Illumina HiSeq 3000	PAIRED
ERR3698132	PRJEB35615	human gut metagenome	stool	Switzerland	Europe	‒	‒	WGS	METAGENOMIC	ILLUMINA	Illumina HiSeq 3000	PAIRED
ERR3698133	PRJEB35615	human gut metagenome	stool	Switzerland	Europe	‒	‒	WGS	METAGENOMIC	ILLUMINA	Illumina HiSeq 3000	PAIRED
ERR3698134	PRJEB35615	human gut metagenome	stool	Switzerland	Europe	‒	‒	WGS	METAGENOMIC	ILLUMINA	Illumina HiSeq 3000	PAIRED
ERR3698135	PRJEB35615	human gut metagenome	stool	Switzerland	Europe	‒	‒	WGS	METAGENOMIC	ILLUMINA	Illumina HiSeq 3000	PAIRED
ERR3698136	PRJEB35615	human gut metagenome	stool	Switzerland	Europe	‒	‒	WGS	METAGENOMIC	ILLUMINA	Illumina HiSeq 3000	PAIRED
ERR3698137	PRJEB35615	human gut metagenome	stool	Switzerland	Europe	‒	‒	WGS	METAGENOMIC	ILLUMINA	Illumina HiSeq 3000	PAIRED
ERR3698138	PRJEB35615	human gut metagenome	stool	Switzerland	Europe	‒	‒	WGS	METAGENOMIC	ILLUMINA	Illumina HiSeq 3000	PAIRED
ERR3698139	PRJEB35615	human gut metagenome	stool	Switzerland	Europe	‒	‒	WGS	METAGENOMIC	ILLUMINA	Illumina HiSeq 3000	PAIRED
ERR3698140	PRJEB35615	human gut metagenome	stool	Switzerland	Europe	‒	‒	WGS	METAGENOMIC	ILLUMINA	Illumina HiSeq 3000	PAIRED
ERR3698141	PRJEB35615	human gut metagenome	stool	Switzerland	Europe	‒	‒	WGS	METAGENOMIC	ILLUMINA	Illumina HiSeq 3000	PAIRED
ERR3698142	PRJEB35615	human gut metagenome	stool	Switzerland	Europe	‒	‒	WGS	METAGENOMIC	ILLUMINA	Illumina HiSeq 3000	PAIRED
ERR3957678	PRJEB36820	human gut metagenome	feces	Ireland	Europe	45	Female	WGS	METAGENOMIC	ILLUMINA	NextSeq 500	PAIRED
ERR3957679	PRJEB36820	human gut metagenome	feces	Ireland	Europe	52	Male	WGS	METAGENOMIC	ILLUMINA	NextSeq 500	PAIRED
ERR3957680	PRJEB36820	human gut metagenome	feces	Ireland	Europe	48	Male	WGS	METAGENOMIC	ILLUMINA	NextSeq 500	PAIRED
ERR3957681	PRJEB36820	human gut metagenome	feces	Ireland	Europe	41	Female	WGS	METAGENOMIC	ILLUMINA	NextSeq 500	PAIRED
ERR3957682	PRJEB36820	human gut metagenome	feces	Ireland	Europe	36	Female	WGS	METAGENOMIC	ILLUMINA	NextSeq 500	PAIRED
ERR3957683	PRJEB36820	human gut metagenome	feces	Ireland	Europe	40	Male	WGS	METAGENOMIC	ILLUMINA	NextSeq 500	PAIRED
ERR3957684	PRJEB36820	human gut metagenome	feces	Ireland	Europe	29	Female	WGS	METAGENOMIC	ILLUMINA	NextSeq 500	PAIRED
ERR3957685	PRJEB36820	human gut metagenome	feces	Ireland	Europe	24	Male	WGS	METAGENOMIC	ILLUMINA	NextSeq 500	PAIRED
ERR3957686	PRJEB36820	human gut metagenome	feces	Ireland	Europe	25	Male	WGS	METAGENOMIC	ILLUMINA	NextSeq 500	PAIRED
ERR3957687	PRJEB36820	human gut metagenome	feces	Ireland	Europe	28	Male	WGS	METAGENOMIC	ILLUMINA	NextSeq 500	PAIRED
ERR3957688	PRJEB36820	human gut metagenome	feces	Ireland	Europe	55	Male	WGS	METAGENOMIC	ILLUMINA	NextSeq 500	PAIRED
ERR3957689	PRJEB36820	human gut metagenome	feces	Ireland	Europe	30	Male	WGS	METAGENOMIC	ILLUMINA	NextSeq 500	PAIRED
ERR3957690	PRJEB36820	human gut metagenome	feces	Ireland	Europe	29	Female	WGS	METAGENOMIC	ILLUMINA	NextSeq 500	PAIRED
ERR3957691	PRJEB36820	human gut metagenome	feces	Ireland	Europe	34	Male	WGS	METAGENOMIC	ILLUMINA	NextSeq 500	PAIRED
ERR3957692	PRJEB36820	human gut metagenome	feces	Ireland	Europe	51	Female	WGS	METAGENOMIC	ILLUMINA	NextSeq 500	PAIRED
ERR3957693	PRJEB36820	human gut metagenome	feces	Ireland	Europe	34	Female	WGS	METAGENOMIC	ILLUMINA	NextSeq 500	PAIRED
ERR3957694	PRJEB36820	human gut metagenome	feces	Ireland	Europe	58	Female	WGS	METAGENOMIC	ILLUMINA	NextSeq 500	PAIRED
ERR3957695	PRJEB36820	human gut metagenome	feces	Ireland	Europe	48	Female	WGS	METAGENOMIC	ILLUMINA	NextSeq 500	PAIRED
ERR3957696	PRJEB36820	human gut metagenome	feces	Ireland	Europe	28	Male	WGS	METAGENOMIC	ILLUMINA	NextSeq 500	PAIRED
ERR3957697	PRJEB36820	human gut metagenome	feces	Ireland	Europe	37	Female	WGS	METAGENOMIC	ILLUMINA	NextSeq 500	PAIRED
ERR3957698	PRJEB36820	human gut metagenome	feces	Ireland	Europe	72	Female	WGS	METAGENOMIC	ILLUMINA	NextSeq 500	PAIRED
ERR3957699	PRJEB36820	human gut metagenome	feces	Ireland	Europe	48	Male	WGS	METAGENOMIC	ILLUMINA	NextSeq 500	PAIRED
ERR3957700	PRJEB36820	human gut metagenome	feces	Ireland	Europe	55	Female	WGS	METAGENOMIC	ILLUMINA	NextSeq 500	PAIRED
ERR3957701	PRJEB36820	human gut metagenome	feces	Ireland	Europe	18	Female	WGS	METAGENOMIC	ILLUMINA	NextSeq 500	PAIRED
ERR3957702	PRJEB36820	human gut metagenome	feces	Ireland	Europe	38	Male	WGS	METAGENOMIC	ILLUMINA	NextSeq 500	PAIRED
ERR3957703	PRJEB36820	human gut metagenome	feces	Ireland	Europe	67	Female	WGS	METAGENOMIC	ILLUMINA	NextSeq 500	PAIRED
ERR3957704	PRJEB36820	human gut metagenome	feces	Ireland	Europe	56	Female	WGS	METAGENOMIC	ILLUMINA	NextSeq 500	PAIRED
ERR3957705	PRJEB36820	human gut metagenome	feces	Ireland	Europe	50	Female	WGS	METAGENOMIC	ILLUMINA	NextSeq 500	PAIRED
ERR3957706	PRJEB36820	human gut metagenome	feces	Ireland	Europe	57	Female	WGS	METAGENOMIC	ILLUMINA	NextSeq 500	PAIRED
ERR3957707	PRJEB36820	human gut metagenome	feces	Ireland	Europe	18	Female	WGS	METAGENOMIC	ILLUMINA	NextSeq 500	PAIRED
ERR3957708	PRJEB36820	human gut metagenome	feces	Ireland	Europe	59	Female	WGS	METAGENOMIC	ILLUMINA	NextSeq 500	PAIRED
ERR3957709	PRJEB36820	human gut metagenome	feces	Ireland	Europe	25	Female	WGS	METAGENOMIC	ILLUMINA	NextSeq 500	PAIRED
ERR3957710	PRJEB36820	human gut metagenome	feces	Ireland	Europe	57	Male	WGS	METAGENOMIC	ILLUMINA	NextSeq 500	PAIRED
ERR3957711	PRJEB36820	human gut metagenome	feces	Ireland	Europe	57	Female	WGS	METAGENOMIC	ILLUMINA	NextSeq 500	PAIRED
ERR3957712	PRJEB36820	human gut metagenome	feces	Ireland	Europe	37	Male	WGS	METAGENOMIC	ILLUMINA	NextSeq 500	PAIRED
ERR3957713	PRJEB36820	human gut metagenome	feces	Ireland	Europe	37	Female	WGS	METAGENOMIC	ILLUMINA	NextSeq 500	PAIRED
ERR3957714	PRJEB36820	human gut metagenome	feces	Ireland	Europe	19	Male	WGS	METAGENOMIC	ILLUMINA	NextSeq 500	PAIRED
ERR3957715	PRJEB36820	human gut metagenome	feces	Ireland	Europe	22	Male	WGS	METAGENOMIC	ILLUMINA	NextSeq 500	PAIRED
ERR3957716	PRJEB36820	human gut metagenome	feces	Ireland	Europe	42	Female	WGS	METAGENOMIC	ILLUMINA	NextSeq 500	PAIRED
ERR3957717	PRJEB36820	human gut metagenome	feces	Ireland	Europe	45	Male	WGS	METAGENOMIC	ILLUMINA	NextSeq 500	PAIRED
ERR3957718	PRJEB36820	human gut metagenome	feces	Ireland	Europe	48	Male	WGS	METAGENOMIC	ILLUMINA	NextSeq 500	PAIRED
ERR3957719	PRJEB36820	human gut metagenome	feces	Ireland	Europe	52	Male	WGS	METAGENOMIC	ILLUMINA	NextSeq 500	PAIRED
ERR3957720	PRJEB36820	human gut metagenome	feces	Ireland	Europe	52	Female	WGS	METAGENOMIC	ILLUMINA	NextSeq 500	PAIRED
ERR3957721	PRJEB36820	human gut metagenome	feces	Ireland	Europe	18	Male	WGS	METAGENOMIC	ILLUMINA	NextSeq 500	PAIRED
ERR3957722	PRJEB36820	human gut metagenome	feces	Ireland	Europe	34	Male	WGS	METAGENOMIC	ILLUMINA	NextSeq 500	PAIRED
ERR3957723	PRJEB36820	human gut metagenome	feces	Ireland	Europe	33	Female	WGS	METAGENOMIC	ILLUMINA	NextSeq 500	PAIRED
ERR3957724	PRJEB36820	human gut metagenome	feces	Ireland	Europe	36	Male	WGS	METAGENOMIC	ILLUMINA	NextSeq 500	PAIRED
ERR3957725	PRJEB36820	human gut metagenome	feces	Ireland	Europe	36	Female	WGS	METAGENOMIC	ILLUMINA	NextSeq 500	PAIRED
ERR3957726	PRJEB36820	human gut metagenome	feces	Ireland	Europe	45	Female	WGS	METAGENOMIC	ILLUMINA	NextSeq 500	PAIRED
ERR3957727	PRJEB36820	human gut metagenome	feces	Ireland	Europe	42	Male	WGS	METAGENOMIC	ILLUMINA	NextSeq 500	PAIRED
ERR3957728	PRJEB36820	human gut metagenome	feces	Ireland	Europe	19	Female	WGS	METAGENOMIC	ILLUMINA	NextSeq 500	PAIRED
ERR3957729	PRJEB36820	human gut metagenome	feces	Ireland	Europe	20	Male	WGS	METAGENOMIC	ILLUMINA	NextSeq 500	PAIRED
ERR3957730	PRJEB36820	human gut metagenome	feces	Ireland	Europe	18	Male	WGS	METAGENOMIC	ILLUMINA	NextSeq 500	PAIRED
ERR3957731	PRJEB36820	human gut metagenome	feces	Ireland	Europe	50	Male	WGS	METAGENOMIC	ILLUMINA	NextSeq 500	PAIRED
ERR3957732	PRJEB36820	human gut metagenome	feces	Ireland	Europe	49	Female	WGS	METAGENOMIC	ILLUMINA	NextSeq 500	PAIRED
ERR3957733	PRJEB36820	human gut metagenome	feces	Ireland	Europe	25	Female	WGS	METAGENOMIC	ILLUMINA	NextSeq 500	PAIRED
ERR3957734	PRJEB36820	human gut metagenome	feces	Ireland	Europe	51	Male	WGS	METAGENOMIC	ILLUMINA	NextSeq 500	PAIRED
ERR3957735	PRJEB36820	human gut metagenome	feces	Ireland	Europe	50	Female	WGS	METAGENOMIC	ILLUMINA	NextSeq 500	PAIRED
ERR3957736	PRJEB36820	human gut metagenome	feces	Ireland	Europe	26	Male	WGS	METAGENOMIC	ILLUMINA	NextSeq 500	PAIRED
ERR3957737	PRJEB36820	human gut metagenome	feces	Ireland	Europe	24	Female	WGS	METAGENOMIC	ILLUMINA	NextSeq 500	PAIRED
ERR3957738	PRJEB36820	human gut metagenome	feces	Ireland	Europe	35	Female	WGS	METAGENOMIC	ILLUMINA	NextSeq 500	PAIRED
ERR3957739	PRJEB36820	human gut metagenome	feces	Ireland	Europe	47	Male	WGS	METAGENOMIC	ILLUMINA	NextSeq 500	PAIRED
ERR3957740	PRJEB36820	human gut metagenome	feces	Ireland	Europe	23	Male	WGS	METAGENOMIC	ILLUMINA	NextSeq 500	PAIRED
ERR3957741	PRJEB36820	human gut metagenome	feces	Ireland	Europe	59	Male	WGS	METAGENOMIC	ILLUMINA	NextSeq 500	PAIRED
ERR3957742	PRJEB36820	human gut metagenome	feces	Ireland	Europe	49	Female	WGS	METAGENOMIC	ILLUMINA	NextSeq 500	PAIRED
ERR3957743	PRJEB36820	human gut metagenome	feces	Ireland	Europe	36	Female	WGS	METAGENOMIC	ILLUMINA	NextSeq 500	PAIRED
ERR3957744	PRJEB36820	human gut metagenome	feces	Ireland	Europe	39	Female	WGS	METAGENOMIC	ILLUMINA	NextSeq 500	PAIRED
ERR3957745	PRJEB36820	human gut metagenome	feces	Ireland	Europe	26	Female	WGS	METAGENOMIC	ILLUMINA	NextSeq 500	PAIRED
ERR3957746	PRJEB36820	human gut metagenome	feces	Ireland	Europe	47	Female	WGS	METAGENOMIC	ILLUMINA	NextSeq 500	PAIRED
ERR3957747	PRJEB36820	human gut metagenome	feces	Ireland	Europe	46	Female	WGS	METAGENOMIC	ILLUMINA	NextSeq 500	PAIRED
ERR3957748	PRJEB36820	human gut metagenome	feces	Ireland	Europe	21	Female	WGS	METAGENOMIC	ILLUMINA	NextSeq 500	PAIRED
ERR3957749	PRJEB36820	human gut metagenome	feces	Ireland	Europe	54	Female	WGS	METAGENOMIC	ILLUMINA	NextSeq 500	PAIRED
ERR3957750	PRJEB36820	human gut metagenome	feces	Ireland	Europe	61	Female	WGS	METAGENOMIC	ILLUMINA	NextSeq 500	PAIRED
ERR3957751	PRJEB36820	human gut metagenome	feces	Ireland	Europe	24	Male	WGS	METAGENOMIC	ILLUMINA	NextSeq 500	PAIRED
ERR3957752	PRJEB36820	human gut metagenome	feces	Ireland	Europe	38	Male	WGS	METAGENOMIC	ILLUMINA	NextSeq 500	PAIRED
ERR3957753	PRJEB36820	human gut metagenome	feces	Ireland	Europe	48	Male	WGS	METAGENOMIC	ILLUMINA	NextSeq 500	PAIRED
ERR3957754	PRJEB36820	human gut metagenome	feces	Ireland	Europe	52	Female	WGS	METAGENOMIC	ILLUMINA	NextSeq 500	PAIRED
ERR3957755	PRJEB36820	human gut metagenome	feces	Ireland	Europe	39	Female	WGS	METAGENOMIC	ILLUMINA	NextSeq 500	PAIRED
ERR3957756	PRJEB36820	human gut metagenome	feces	Ireland	Europe	32	Female	WGS	METAGENOMIC	ILLUMINA	NextSeq 500	PAIRED
ERR3957757	PRJEB36820	human gut metagenome	feces	Ireland	Europe	53	Female	WGS	METAGENOMIC	ILLUMINA	NextSeq 500	PAIRED
ERR3957758	PRJEB36820	human gut metagenome	feces	Ireland	Europe	29	Female	WGS	METAGENOMIC	ILLUMINA	NextSeq 500	PAIRED
ERR3957759	PRJEB36820	human gut metagenome	feces	Ireland	Europe	46	Female	WGS	METAGENOMIC	ILLUMINA	NextSeq 500	PAIRED
ERR3957760	PRJEB36820	human gut metagenome	feces	Ireland	Europe	58	Female	WGS	METAGENOMIC	ILLUMINA	NextSeq 500	PAIRED
ERR3957761	PRJEB36820	human gut metagenome	feces	Ireland	Europe	37	Female	WGS	METAGENOMIC	ILLUMINA	NextSeq 500	PAIRED
ERR3957762	PRJEB36820	human gut metagenome	feces	Ireland	Europe	46	Male	WGS	METAGENOMIC	ILLUMINA	NextSeq 500	PAIRED
ERR3957763	PRJEB36820	human gut metagenome	feces	Ireland	Europe	18	Male	WGS	METAGENOMIC	ILLUMINA	NextSeq 500	PAIRED
ERR3957764	PRJEB36820	human gut metagenome	feces	Ireland	Europe	57	Male	WGS	METAGENOMIC	ILLUMINA	NextSeq 500	PAIRED
ERR3957765	PRJEB36820	human gut metagenome	feces	Ireland	Europe	29	Male	WGS	METAGENOMIC	ILLUMINA	NextSeq 500	PAIRED
ERR3957766	PRJEB36820	human gut metagenome	feces	Ireland	Europe	55	Female	WGS	METAGENOMIC	ILLUMINA	NextSeq 500	PAIRED
ERR3957767	PRJEB36820	human gut metagenome	feces	Ireland	Europe	31	Male	WGS	METAGENOMIC	ILLUMINA	NextSeq 500	PAIRED
ERR3957768	PRJEB36820	human gut metagenome	feces	Ireland	Europe	34	Female	WGS	METAGENOMIC	ILLUMINA	NextSeq 500	PAIRED
ERR3957769	PRJEB36820	human gut metagenome	feces	Ireland	Europe	30	Female	WGS	METAGENOMIC	ILLUMINA	NextSeq 500	PAIRED
ERR3957770	PRJEB36820	human gut metagenome	feces	Ireland	Europe	47	Female	WGS	METAGENOMIC	ILLUMINA	NextSeq 500	PAIRED
ERR3957771	PRJEB36820	human gut metagenome	feces	Ireland	Europe	49	Male	WGS	METAGENOMIC	ILLUMINA	NextSeq 500	PAIRED
ERR3957772	PRJEB36820	human gut metagenome	feces	Ireland	Europe	18	Male	WGS	METAGENOMIC	ILLUMINA	NextSeq 500	PAIRED
ERR3957773	PRJEB36820	human gut metagenome	feces	Ireland	Europe	32	Male	WGS	METAGENOMIC	ILLUMINA	NextSeq 500	PAIRED
ERR3957774	PRJEB36820	human gut metagenome	feces	Ireland	Europe	59	Male	WGS	METAGENOMIC	ILLUMINA	NextSeq 500	PAIRED
ERR3957775	PRJEB36820	human gut metagenome	feces	Ireland	Europe	29	Male	WGS	METAGENOMIC	ILLUMINA	NextSeq 500	PAIRED
ERR3957776	PRJEB36820	human gut metagenome	feces	Ireland	Europe	34	Male	WGS	METAGENOMIC	ILLUMINA	NextSeq 500	PAIRED
ERR3957777	PRJEB36820	human gut metagenome	feces	Ireland	Europe	25	Male	WGS	METAGENOMIC	ILLUMINA	NextSeq 500	PAIRED
ERR3957778	PRJEB36820	human gut metagenome	feces	Ireland	Europe	22	Female	WGS	METAGENOMIC	ILLUMINA	NextSeq 500	PAIRED
ERR3957779	PRJEB36820	human gut metagenome	feces	Ireland	Europe	25	Male	WGS	METAGENOMIC	ILLUMINA	NextSeq 500	PAIRED
ERR3957780	PRJEB36820	human gut metagenome	feces	Ireland	Europe	35	Female	WGS	METAGENOMIC	ILLUMINA	NextSeq 500	PAIRED
ERR3957781	PRJEB36820	human gut metagenome	feces	Ireland	Europe	56	Female	WGS	METAGENOMIC	ILLUMINA	NextSeq 500	PAIRED
ERR3957782	PRJEB36820	human gut metagenome	feces	Ireland	Europe	20	Female	WGS	METAGENOMIC	ILLUMINA	NextSeq 500	PAIRED
ERR3957783	PRJEB36820	human gut metagenome	feces	Ireland	Europe	25	Male	WGS	METAGENOMIC	ILLUMINA	NextSeq 500	PAIRED
ERR3957784	PRJEB36820	human gut metagenome	feces	Ireland	Europe	28	Male	WGS	METAGENOMIC	ILLUMINA	NextSeq 500	PAIRED
ERR3957785	PRJEB36820	human gut metagenome	feces	Ireland	Europe	28	Female	WGS	METAGENOMIC	ILLUMINA	NextSeq 500	PAIRED
ERR3957786	PRJEB36820	human gut metagenome	feces	Ireland	Europe	27	Female	WGS	METAGENOMIC	ILLUMINA	NextSeq 500	PAIRED
ERR3957787	PRJEB36820	human gut metagenome	feces	Ireland	Europe	40	Male	WGS	METAGENOMIC	ILLUMINA	NextSeq 500	PAIRED
ERR3957788	PRJEB36820	human gut metagenome	feces	Ireland	Europe	60	Male	WGS	METAGENOMIC	ILLUMINA	NextSeq 500	PAIRED
ERR3957789	PRJEB36820	human gut metagenome	feces	Ireland	Europe	59	Female	WGS	METAGENOMIC	ILLUMINA	NextSeq 500	PAIRED
ERR3957790	PRJEB36820	human gut metagenome	feces	Ireland	Europe	29	Female	WGS	METAGENOMIC	ILLUMINA	NextSeq 500	PAIRED
ERR3957791	PRJEB36820	human gut metagenome	feces	Ireland	Europe	25	Female	WGS	METAGENOMIC	ILLUMINA	NextSeq 500	PAIRED
ERR3957792	PRJEB36820	human gut metagenome	feces	Ireland	Europe	38	Female	WGS	METAGENOMIC	ILLUMINA	NextSeq 500	PAIRED
ERR3957793	PRJEB36820	human gut metagenome	feces	Ireland	Europe	34	Male	WGS	METAGENOMIC	ILLUMINA	NextSeq 500	PAIRED
ERR3957794	PRJEB36820	human gut metagenome	feces	Ireland	Europe	31	Female	WGS	METAGENOMIC	ILLUMINA	NextSeq 500	PAIRED
ERR3957795	PRJEB36820	human gut metagenome	feces	Ireland	Europe	22	Female	WGS	METAGENOMIC	ILLUMINA	NextSeq 500	PAIRED
ERR4507575	PRJEB39813	Homo sapiens	Feces	Singapore	Asia	55	male	WGS	METAGENOMIC	ILLUMINA	Illumina HiSeq 4000	SINGLE
ERR4507576	PRJEB39813	Homo sapiens	Feces	Singapore	Asia	56	female	WGS	METAGENOMIC	ILLUMINA	Illumina HiSeq 4000	SINGLE
ERR4507577	PRJEB39813	Homo sapiens	Feces	Singapore	Asia	66	male	WGS	METAGENOMIC	ILLUMINA	Illumina HiSeq 4000	SINGLE
ERR4507578	PRJEB39813	Homo sapiens	Feces	Singapore	Asia	39	male	WGS	METAGENOMIC	ILLUMINA	Illumina HiSeq 4000	SINGLE
ERR4507579	PRJEB39813	Homo sapiens	Feces	Singapore	Asia	61	male	WGS	METAGENOMIC	ILLUMINA	Illumina HiSeq 4000	SINGLE
ERR4507580	PRJEB39813	Homo sapiens	Feces	Singapore	Asia	32	male	WGS	METAGENOMIC	ILLUMINA	Illumina HiSeq 4000	SINGLE
ERR4507581	PRJEB39813	Homo sapiens	Feces	Singapore	Asia	60	female	WGS	METAGENOMIC	ILLUMINA	Illumina HiSeq 4000	SINGLE
ERR4507582	PRJEB39813	Homo sapiens	Feces	Singapore	Asia	35	female	WGS	METAGENOMIC	ILLUMINA	Illumina HiSeq 4000	SINGLE
ERR4507583	PRJEB39813	Homo sapiens	Feces	Singapore	Asia	21	male	WGS	METAGENOMIC	ILLUMINA	Illumina HiSeq 4000	SINGLE
ERR4507584	PRJEB39813	Homo sapiens	Feces	Singapore	Asia	50	female	WGS	METAGENOMIC	ILLUMINA	Illumina HiSeq 4000	SINGLE
ERR4507585	PRJEB39813	Homo sapiens	Feces	Singapore	Asia	32	female	WGS	METAGENOMIC	ILLUMINA	Illumina HiSeq 4000	SINGLE
ERR4507586	PRJEB39813	Homo sapiens	Feces	Singapore	Asia	56	male	WGS	METAGENOMIC	ILLUMINA	Illumina HiSeq 4000	SINGLE
ERR4507587	PRJEB39813	Homo sapiens	Feces	Singapore	Asia	51	female	WGS	METAGENOMIC	ILLUMINA	Illumina HiSeq 4000	SINGLE
ERR4507588	PRJEB39813	Homo sapiens	Feces	Singapore	Asia	27	female	WGS	METAGENOMIC	ILLUMINA	Illumina HiSeq 4000	SINGLE
ERR4507589	PRJEB39813	Homo sapiens	Feces	Singapore	Asia	26	female	WGS	METAGENOMIC	ILLUMINA	Illumina HiSeq 4000	SINGLE
ERR4507590	PRJEB39813	Homo sapiens	Feces	Singapore	Asia	30	female	WGS	METAGENOMIC	ILLUMINA	Illumina HiSeq 4000	SINGLE
ERR4507591	PRJEB39813	Homo sapiens	Feces	Singapore	Asia	49	female	WGS	METAGENOMIC	ILLUMINA	Illumina HiSeq 4000	SINGLE
ERR4507592	PRJEB39813	Homo sapiens	Feces	Singapore	Asia	31	male	WGS	METAGENOMIC	ILLUMINA	Illumina HiSeq 4000	SINGLE
ERR4507593	PRJEB39813	Homo sapiens	Feces	Singapore	Asia	30	female	WGS	METAGENOMIC	ILLUMINA	Illumina HiSeq 4000	SINGLE
ERR4507594	PRJEB39813	Homo sapiens	Feces	Singapore	Asia	39	male	WGS	METAGENOMIC	ILLUMINA	Illumina HiSeq 4000	SINGLE
ERR4507595	PRJEB39813	Homo sapiens	Feces	Singapore	Asia	22	female	WGS	METAGENOMIC	ILLUMINA	Illumina HiSeq 4000	SINGLE
ERR4507596	PRJEB39813	Homo sapiens	Feces	Singapore	Asia	46	female	WGS	METAGENOMIC	ILLUMINA	Illumina HiSeq 4000	SINGLE
ERR4507597	PRJEB39813	Homo sapiens	Feces	Singapore	Asia	35	female	WGS	METAGENOMIC	ILLUMINA	Illumina HiSeq 4000	SINGLE
ERR4507598	PRJEB39813	Homo sapiens	Feces	Singapore	Asia	21	female	WGS	METAGENOMIC	ILLUMINA	Illumina HiSeq 4000	SINGLE
ERR4507599	PRJEB39813	Homo sapiens	Feces	Singapore	Asia	41	female	WGS	METAGENOMIC	ILLUMINA	Illumina HiSeq 4000	SINGLE
ERR5981981	PRJEB44737	human gut metagenome	human feces	Netherlands	Europe	‒	‒	WGS	METAGENOMIC	ILLUMINA	NextSeq 550	PAIRED
ERR5981982	PRJEB44737	human gut metagenome	human feces	Netherlands	Europe	‒	‒	WGS	METAGENOMIC	ILLUMINA	NextSeq 550	PAIRED
ERR5981983	PRJEB44737	human gut metagenome	human feces	Netherlands	Europe	‒	‒	WGS	METAGENOMIC	ILLUMINA	NextSeq 550	PAIRED
ERR5981984	PRJEB44737	human gut metagenome	human feces	Netherlands	Europe	‒	‒	WGS	METAGENOMIC	ILLUMINA	NextSeq 550	PAIRED
ERR5981985	PRJEB44737	human gut metagenome	human feces	Netherlands	Europe	‒	‒	WGS	METAGENOMIC	ILLUMINA	NextSeq 550	PAIRED
ERR5981986	PRJEB44737	human gut metagenome	human feces	Netherlands	Europe	‒	‒	WGS	METAGENOMIC	ILLUMINA	NextSeq 550	PAIRED
ERR5981987	PRJEB44737	human gut metagenome	human feces	Netherlands	Europe	‒	‒	WGS	METAGENOMIC	ILLUMINA	NextSeq 550	PAIRED
ERR5981988	PRJEB44737	human gut metagenome	human feces	Netherlands	Europe	‒	‒	WGS	METAGENOMIC	ILLUMINA	NextSeq 550	PAIRED
ERR5981989	PRJEB44737	human gut metagenome	human feces	Netherlands	Europe	‒	‒	WGS	METAGENOMIC	ILLUMINA	NextSeq 550	PAIRED
ERR5981990	PRJEB44737	human gut metagenome	human feces	Netherlands	Europe	‒	‒	WGS	METAGENOMIC	ILLUMINA	NextSeq 550	PAIRED
ERR5981991	PRJEB44737	human gut metagenome	human feces	Netherlands	Europe	‒	‒	WGS	METAGENOMIC	ILLUMINA	NextSeq 550	PAIRED
ERR5981992	PRJEB44737	human gut metagenome	human feces	Netherlands	Europe	‒	‒	WGS	METAGENOMIC	ILLUMINA	NextSeq 550	PAIRED
ERR5981993	PRJEB44737	human gut metagenome	human feces	Netherlands	Europe	‒	‒	WGS	METAGENOMIC	ILLUMINA	NextSeq 550	PAIRED
ERR5981994	PRJEB44737	human gut metagenome	human feces	Netherlands	Europe	‒	‒	WGS	METAGENOMIC	ILLUMINA	NextSeq 550	PAIRED
ERR5981995	PRJEB44737	human gut metagenome	human feces	Netherlands	Europe	‒	‒	WGS	METAGENOMIC	ILLUMINA	NextSeq 550	PAIRED
ERR5981996	PRJEB44737	human gut metagenome	human feces	Netherlands	Europe	‒	‒	WGS	METAGENOMIC	ILLUMINA	NextSeq 550	PAIRED
ERR5981997	PRJEB44737	human gut metagenome	human feces	Netherlands	Europe	‒	‒	WGS	METAGENOMIC	ILLUMINA	NextSeq 550	PAIRED
ERR5981998	PRJEB44737	human gut metagenome	human feces	Netherlands	Europe	‒	‒	WGS	METAGENOMIC	ILLUMINA	NextSeq 550	PAIRED
ERR5981999	PRJEB44737	human gut metagenome	human feces	Netherlands	Europe	‒	‒	WGS	METAGENOMIC	ILLUMINA	NextSeq 550	PAIRED
ERR5982000	PRJEB44737	human gut metagenome	human feces	Netherlands	Europe	‒	‒	WGS	METAGENOMIC	ILLUMINA	NextSeq 550	PAIRED
ERR5982001	PRJEB44737	human gut metagenome	human feces	Netherlands	Europe	‒	‒	WGS	METAGENOMIC	ILLUMINA	NextSeq 550	PAIRED
ERR5982002	PRJEB44737	human gut metagenome	human feces	Netherlands	Europe	‒	‒	WGS	METAGENOMIC	ILLUMINA	NextSeq 550	PAIRED
ERR5982003	PRJEB44737	human gut metagenome	human feces	Netherlands	Europe	‒	‒	WGS	METAGENOMIC	ILLUMINA	NextSeq 550	PAIRED
ERR5982004	PRJEB44737	human gut metagenome	human feces	Netherlands	Europe	‒	‒	WGS	METAGENOMIC	ILLUMINA	NextSeq 550	PAIRED
ERR5982005	PRJEB44737	human gut metagenome	human feces	Netherlands	Europe	‒	‒	WGS	METAGENOMIC	ILLUMINA	NextSeq 550	PAIRED
ERR5982006	PRJEB44737	human gut metagenome	human feces	Netherlands	Europe	‒	‒	WGS	METAGENOMIC	ILLUMINA	NextSeq 550	PAIRED
ERR5982007	PRJEB44737	human gut metagenome	human feces	Netherlands	Europe	‒	‒	WGS	METAGENOMIC	ILLUMINA	NextSeq 550	PAIRED
ERR5982008	PRJEB44737	human gut metagenome	human feces	Netherlands	Europe	‒	‒	WGS	METAGENOMIC	ILLUMINA	NextSeq 550	PAIRED
ERR5982009	PRJEB44737	human gut metagenome	human feces	Netherlands	Europe	‒	‒	WGS	METAGENOMIC	ILLUMINA	NextSeq 550	PAIRED
ERR5982010	PRJEB44737	human gut metagenome	human feces	Netherlands	Europe	‒	‒	WGS	METAGENOMIC	ILLUMINA	NextSeq 550	PAIRED
ERR5982011	PRJEB44737	human gut metagenome	human feces	Netherlands	Europe	‒	‒	WGS	METAGENOMIC	ILLUMINA	NextSeq 550	PAIRED
ERR5982012	PRJEB44737	human gut metagenome	human feces	Netherlands	Europe	‒	‒	WGS	METAGENOMIC	ILLUMINA	NextSeq 550	PAIRED
ERR5982013	PRJEB44737	human gut metagenome	human feces	Netherlands	Europe	‒	‒	WGS	METAGENOMIC	ILLUMINA	NextSeq 550	PAIRED
ERR5982014	PRJEB44737	human gut metagenome	human feces	Netherlands	Europe	‒	‒	WGS	METAGENOMIC	ILLUMINA	NextSeq 550	PAIRED
ERR5982015	PRJEB44737	human gut metagenome	human feces	Netherlands	Europe	‒	‒	WGS	METAGENOMIC	ILLUMINA	NextSeq 550	PAIRED
ERR5982016	PRJEB44737	human gut metagenome	human feces	Netherlands	Europe	‒	‒	WGS	METAGENOMIC	ILLUMINA	NextSeq 550	PAIRED
ERR5982017	PRJEB44737	human gut metagenome	human feces	Netherlands	Europe	‒	‒	WGS	METAGENOMIC	ILLUMINA	NextSeq 550	PAIRED
ERR5982018	PRJEB44737	human gut metagenome	human feces	Netherlands	Europe	‒	‒	WGS	METAGENOMIC	ILLUMINA	NextSeq 550	PAIRED
ERR505083	PRJEB6092	human gut metagenome	feces	Australia	Oceania	‒	‒	WGS	METAGENOMIC	ILLUMINA	Illumina HiSeq 1000	PAIRED
ERR505084	PRJEB6092	human gut metagenome	feces	Australia	Oceania	‒	‒	WGS	METAGENOMIC	ILLUMINA	Illumina HiSeq 1000	PAIRED
ERR505085	PRJEB6092	human gut metagenome	feces	Australia	Oceania	‒	‒	WGS	METAGENOMIC	ILLUMINA	Illumina HiSeq 1000	PAIRED
ERR505086	PRJEB6092	human gut metagenome	feces	Australia	Oceania	‒	‒	WGS	METAGENOMIC	ILLUMINA	Illumina HiSeq 1000	PAIRED
ERR505087	PRJEB6092	human gut metagenome	feces	Australia	Oceania	‒	‒	WGS	METAGENOMIC	ILLUMINA	Illumina HiSeq 1000	PAIRED
ERR505088	PRJEB6092	human gut metagenome	feces	Australia	Oceania	‒	‒	WGS	METAGENOMIC	ILLUMINA	Illumina HiSeq 1000	PAIRED
ERR505089	PRJEB6092	human gut metagenome	feces	Australia	Oceania	‒	‒	WGS	METAGENOMIC	ILLUMINA	Illumina HiSeq 1000	PAIRED
ERR505090	PRJEB6092	human gut metagenome	feces	Australia	Oceania	‒	‒	WGS	METAGENOMIC	ILLUMINA	Illumina HiSeq 1000	PAIRED
ERR505091	PRJEB6092	human gut metagenome	feces	Australia	Oceania	‒	‒	WGS	METAGENOMIC	ILLUMINA	Illumina HiSeq 1000	PAIRED
ERR505092	PRJEB6092	human gut metagenome	feces	Australia	Oceania	‒	‒	WGS	METAGENOMIC	ILLUMINA	Illumina HiSeq 1000	PAIRED
ERR505093	PRJEB6092	human gut metagenome	feces	Australia	Oceania	‒	‒	WGS	METAGENOMIC	ILLUMINA	Illumina HiSeq 1000	PAIRED
ERR505094	PRJEB6092	human gut metagenome	feces	Australia	Oceania	‒	‒	WGS	METAGENOMIC	ILLUMINA	Illumina HiSeq 1000	PAIRED
ERR505095	PRJEB6092	human gut metagenome	feces	Australia	Oceania	‒	‒	WGS	METAGENOMIC	ILLUMINA	Illumina HiSeq 1000	PAIRED
ERR505096	PRJEB6092	human gut metagenome	feces	Australia	Oceania	‒	‒	WGS	METAGENOMIC	ILLUMINA	Illumina HiSeq 1000	PAIRED
ERR505097	PRJEB6092	human gut metagenome	feces	Australia	Oceania	‒	‒	WGS	METAGENOMIC	ILLUMINA	Illumina HiSeq 1000	PAIRED
ERR505098	PRJEB6092	human gut metagenome	feces	Australia	Oceania	‒	‒	WGS	METAGENOMIC	ILLUMINA	Illumina HiSeq 1000	PAIRED
ERR505099	PRJEB6092	human gut metagenome	feces	Australia	Oceania	‒	‒	WGS	METAGENOMIC	ILLUMINA	Illumina HiSeq 1000	PAIRED
ERR505100	PRJEB6092	human gut metagenome	feces	Australia	Oceania	‒	‒	WGS	METAGENOMIC	ILLUMINA	Illumina HiSeq 1000	PAIRED
ERR505101	PRJEB6092	human gut metagenome	feces	Australia	Oceania	‒	‒	WGS	METAGENOMIC	ILLUMINA	Illumina HiSeq 1000	PAIRED
ERR505102	PRJEB6092	human gut metagenome	feces	Australia	Oceania	‒	‒	WGS	METAGENOMIC	ILLUMINA	Illumina HiSeq 1000	PAIRED
ERR505103	PRJEB6092	human gut metagenome	feces	Australia	Oceania	‒	‒	WGS	METAGENOMIC	ILLUMINA	Illumina HiSeq 1000	PAIRED
ERR505104	PRJEB6092	human gut metagenome	feces	Australia	Oceania	‒	‒	WGS	METAGENOMIC	ILLUMINA	Illumina HiSeq 1000	PAIRED
ERR505105	PRJEB6092	human gut metagenome	feces	Australia	Oceania	‒	‒	WGS	METAGENOMIC	ILLUMINA	Illumina HiSeq 1000	PAIRED
ERR505106	PRJEB6092	human gut metagenome	feces	Australia	Oceania	‒	‒	WGS	METAGENOMIC	ILLUMINA	Illumina HiSeq 1000	PAIRED
ERR747972	PRJEB8347	human gut metagenome	feces	Germany	Europe	52	male	WGS	METAGENOMIC	ILLUMINA	Illumina HiSeq 2000	PAIRED
ERR748056	PRJEB8347	human gut metagenome	feces	Germany	Europe	37	male	WGS	METAGENOMIC	ILLUMINA	Illumina HiSeq 2000	PAIRED
ERR748114	PRJEB8347	human gut metagenome	feces	Germany	Europe	35	female	WGS	METAGENOMIC	ILLUMINA	Illumina HiSeq 2000	PAIRED
ERR748130	PRJEB8347	human gut metagenome	feces	Germany	Europe	33	male	WGS	METAGENOMIC	ILLUMINA	Illumina HiSeq 2000	PAIRED
ERR748154	PRJEB8347	human gut metagenome	feces	Germany	Europe	40	male	WGS	METAGENOMIC	ILLUMINA	Illumina HiSeq 2000	PAIRED
ERR748211	PRJEB8347	human gut metagenome	feces	Germany	Europe	37	male	WGS	METAGENOMIC	ILLUMINA	Illumina HiSeq 2000	PAIRED
ERR748240	PRJEB8347	human gut metagenome	feces	Germany	Europe	30	female	WGS	METAGENOMIC	ILLUMINA	Illumina HiSeq 2000	PAIRED
ERR911953	PRJEB9576	human gut metagenome	faeces	United Kingdom	Europe	‒	‒	WGS	METAGENOMIC	ILLUMINA	Illumina HiSeq 2000	PAIRED
ERR911954	PRJEB9576	human gut metagenome	faeces	United Kingdom	Europe	‒	‒	WGS	METAGENOMIC	ILLUMINA	Illumina HiSeq 2000	PAIRED
ERR911955	PRJEB9576	human gut metagenome	faeces	United Kingdom	Europe	‒	‒	WGS	METAGENOMIC	ILLUMINA	Illumina HiSeq 2000	PAIRED
ERR911956	PRJEB9576	human gut metagenome	faeces	United Kingdom	Europe	‒	‒	WGS	METAGENOMIC	ILLUMINA	Illumina HiSeq 2000	PAIRED
ERR911957	PRJEB9576	human gut metagenome	faeces	United Kingdom	Europe	‒	‒	WGS	METAGENOMIC	ILLUMINA	Illumina HiSeq 2000	PAIRED
ERR911958	PRJEB9576	human gut metagenome	faeces	United Kingdom	Europe	‒	‒	WGS	METAGENOMIC	ILLUMINA	Illumina HiSeq 2000	PAIRED
ERR911959	PRJEB9576	human gut metagenome	faeces	United Kingdom	Europe	‒	‒	WGS	METAGENOMIC	ILLUMINA	Illumina HiSeq 2000	PAIRED
ERR911960	PRJEB9576	human gut metagenome	faeces	United Kingdom	Europe	‒	‒	WGS	METAGENOMIC	ILLUMINA	Illumina HiSeq 2000	PAIRED
ERR911961	PRJEB9576	human gut metagenome	faeces	United Kingdom	Europe	‒	‒	WGS	METAGENOMIC	ILLUMINA	Illumina HiSeq 2000	PAIRED
ERR911962	PRJEB9576	human gut metagenome	faeces	United Kingdom	Europe	‒	‒	WGS	METAGENOMIC	ILLUMINA	Illumina HiSeq 2000	PAIRED
ERR911963	PRJEB9576	human gut metagenome	faeces	United Kingdom	Europe	‒	‒	WGS	METAGENOMIC	ILLUMINA	Illumina HiSeq 2000	PAIRED
ERR911964	PRJEB9576	human gut metagenome	faeces	United Kingdom	Europe	‒	‒	WGS	METAGENOMIC	ILLUMINA	Illumina HiSeq 2000	PAIRED
ERR911965	PRJEB9576	human gut metagenome	faeces	United Kingdom	Europe	‒	‒	WGS	METAGENOMIC	ILLUMINA	Illumina HiSeq 2000	PAIRED
ERR911966	PRJEB9576	human gut metagenome	faeces	United Kingdom	Europe	‒	‒	WGS	METAGENOMIC	ILLUMINA	Illumina HiSeq 2000	PAIRED
ERR911967	PRJEB9576	human gut metagenome	faeces	United Kingdom	Europe	‒	‒	WGS	METAGENOMIC	ILLUMINA	Illumina HiSeq 2000	PAIRED
ERR911968	PRJEB9576	human gut metagenome	faeces	United Kingdom	Europe	‒	‒	WGS	METAGENOMIC	ILLUMINA	Illumina HiSeq 2000	PAIRED
ERR911969	PRJEB9576	human gut metagenome	faeces	United Kingdom	Europe	‒	‒	WGS	METAGENOMIC	ILLUMINA	Illumina HiSeq 2000	PAIRED
ERR911970	PRJEB9576	human gut metagenome	faeces	United Kingdom	Europe	‒	‒	WGS	METAGENOMIC	ILLUMINA	Illumina HiSeq 2000	PAIRED
ERR911971	PRJEB9576	human gut metagenome	faeces	United Kingdom	Europe	‒	‒	WGS	METAGENOMIC	ILLUMINA	Illumina HiSeq 2000	PAIRED
ERR911972	PRJEB9576	human gut metagenome	faeces	United Kingdom	Europe	‒	‒	WGS	METAGENOMIC	ILLUMINA	Illumina HiSeq 2000	PAIRED
ERR911973	PRJEB9576	human gut metagenome	faeces	United Kingdom	Europe	‒	‒	WGS	METAGENOMIC	ILLUMINA	Illumina HiSeq 2000	PAIRED
ERR911974	PRJEB9576	human gut metagenome	faeces	United Kingdom	Europe	‒	‒	WGS	METAGENOMIC	ILLUMINA	Illumina HiSeq 2000	PAIRED
ERR911975	PRJEB9576	human gut metagenome	faeces	United Kingdom	Europe	‒	‒	WGS	METAGENOMIC	ILLUMINA	Illumina HiSeq 2000	PAIRED
ERR911976	PRJEB9576	human gut metagenome	faeces	United Kingdom	Europe	‒	‒	WGS	METAGENOMIC	ILLUMINA	Illumina HiSeq 2000	PAIRED
ERR911977	PRJEB9576	human gut metagenome	faeces	United Kingdom	Europe	‒	‒	WGS	METAGENOMIC	ILLUMINA	Illumina HiSeq 2000	PAIRED
ERR911978	PRJEB9576	human gut metagenome	faeces	United Kingdom	Europe	‒	‒	WGS	METAGENOMIC	ILLUMINA	Illumina HiSeq 2000	PAIRED
ERR911979	PRJEB9576	human gut metagenome	faeces	United Kingdom	Europe	‒	‒	WGS	METAGENOMIC	ILLUMINA	Illumina HiSeq 2000	PAIRED
ERR911980	PRJEB9576	human gut metagenome	faeces	United Kingdom	Europe	‒	‒	WGS	METAGENOMIC	ILLUMINA	Illumina HiSeq 2000	PAIRED
ERR911981	PRJEB9576	human gut metagenome	faeces	United Kingdom	Europe	‒	‒	WGS	METAGENOMIC	ILLUMINA	Illumina HiSeq 2000	PAIRED
ERR911982	PRJEB9576	human gut metagenome	faeces	United Kingdom	Europe	‒	‒	WGS	METAGENOMIC	ILLUMINA	Illumina HiSeq 2000	PAIRED
ERR911983	PRJEB9576	human gut metagenome	faeces	United Kingdom	Europe	‒	‒	WGS	METAGENOMIC	ILLUMINA	Illumina HiSeq 2000	PAIRED
ERR911984	PRJEB9576	human gut metagenome	faeces	United Kingdom	Europe	‒	‒	WGS	METAGENOMIC	ILLUMINA	Illumina HiSeq 2000	PAIRED
ERR911985	PRJEB9576	human gut metagenome	faeces	United Kingdom	Europe	‒	‒	WGS	METAGENOMIC	ILLUMINA	Illumina HiSeq 2000	PAIRED
ERR911986	PRJEB9576	human gut metagenome	faeces	United Kingdom	Europe	‒	‒	WGS	METAGENOMIC	ILLUMINA	Illumina HiSeq 2000	PAIRED
ERR911987	PRJEB9576	human gut metagenome	faeces	United Kingdom	Europe	‒	‒	WGS	METAGENOMIC	ILLUMINA	Illumina HiSeq 2000	PAIRED
ERR911988	PRJEB9576	human gut metagenome	faeces	United Kingdom	Europe	‒	‒	WGS	METAGENOMIC	ILLUMINA	Illumina HiSeq 2000	PAIRED
ERR911989	PRJEB9576	human gut metagenome	faeces	United Kingdom	Europe	‒	‒	WGS	METAGENOMIC	ILLUMINA	Illumina HiSeq 2000	PAIRED
ERR911990	PRJEB9576	human gut metagenome	faeces	United Kingdom	Europe	‒	‒	WGS	METAGENOMIC	ILLUMINA	Illumina HiSeq 2000	PAIRED
ERR911991	PRJEB9576	human gut metagenome	faeces	United Kingdom	Europe	‒	‒	WGS	METAGENOMIC	ILLUMINA	Illumina HiSeq 2000	PAIRED
ERR911992	PRJEB9576	human gut metagenome	faeces	United Kingdom	Europe	‒	‒	WGS	METAGENOMIC	ILLUMINA	Illumina HiSeq 2000	PAIRED
ERR911993	PRJEB9576	human gut metagenome	faeces	United Kingdom	Europe	‒	‒	WGS	METAGENOMIC	ILLUMINA	Illumina HiSeq 2000	PAIRED
ERR911994	PRJEB9576	human gut metagenome	faeces	United Kingdom	Europe	‒	‒	WGS	METAGENOMIC	ILLUMINA	Illumina HiSeq 2000	PAIRED
ERR911995	PRJEB9576	human gut metagenome	faeces	United Kingdom	Europe	‒	‒	WGS	METAGENOMIC	ILLUMINA	Illumina HiSeq 2000	PAIRED
ERR911996	PRJEB9576	human gut metagenome	faeces	United Kingdom	Europe	‒	‒	WGS	METAGENOMIC	ILLUMINA	Illumina HiSeq 2000	PAIRED
ERR911997	PRJEB9576	human gut metagenome	faeces	United Kingdom	Europe	‒	‒	WGS	METAGENOMIC	ILLUMINA	Illumina HiSeq 2000	PAIRED
ERR911998	PRJEB9576	human gut metagenome	faeces	United Kingdom	Europe	‒	‒	WGS	METAGENOMIC	ILLUMINA	Illumina HiSeq 2000	PAIRED
ERR911999	PRJEB9576	human gut metagenome	faeces	United Kingdom	Europe	‒	‒	WGS	METAGENOMIC	ILLUMINA	Illumina HiSeq 2000	PAIRED
ERR912000	PRJEB9576	human gut metagenome	faeces	United Kingdom	Europe	‒	‒	WGS	METAGENOMIC	ILLUMINA	Illumina HiSeq 2000	PAIRED
ERR912001	PRJEB9576	human gut metagenome	faeces	United Kingdom	Europe	‒	‒	WGS	METAGENOMIC	ILLUMINA	Illumina HiSeq 2000	PAIRED
ERR912002	PRJEB9576	human gut metagenome	faeces	United Kingdom	Europe	‒	‒	WGS	METAGENOMIC	ILLUMINA	Illumina HiSeq 2000	PAIRED
ERR912003	PRJEB9576	human gut metagenome	faeces	United Kingdom	Europe	‒	‒	WGS	METAGENOMIC	ILLUMINA	Illumina HiSeq 2000	PAIRED
ERR912004	PRJEB9576	human gut metagenome	faeces	United Kingdom	Europe	‒	‒	WGS	METAGENOMIC	ILLUMINA	Illumina HiSeq 2000	PAIRED
ERR912005	PRJEB9576	human gut metagenome	faeces	United Kingdom	Europe	‒	‒	WGS	METAGENOMIC	ILLUMINA	Illumina HiSeq 2000	PAIRED
ERR912006	PRJEB9576	human gut metagenome	faeces	United Kingdom	Europe	‒	‒	WGS	METAGENOMIC	ILLUMINA	Illumina HiSeq 2000	PAIRED
ERR912007	PRJEB9576	human gut metagenome	faeces	United Kingdom	Europe	‒	‒	WGS	METAGENOMIC	ILLUMINA	Illumina HiSeq 2000	PAIRED
ERR912008	PRJEB9576	human gut metagenome	faeces	United Kingdom	Europe	‒	‒	WGS	METAGENOMIC	ILLUMINA	Illumina HiSeq 2000	PAIRED
ERR912009	PRJEB9576	human gut metagenome	faeces	United Kingdom	Europe	‒	‒	WGS	METAGENOMIC	ILLUMINA	Illumina HiSeq 2000	PAIRED
ERR912010	PRJEB9576	human gut metagenome	faeces	United Kingdom	Europe	‒	‒	WGS	METAGENOMIC	ILLUMINA	Illumina HiSeq 2000	PAIRED
ERR912011	PRJEB9576	human gut metagenome	faeces	United Kingdom	Europe	‒	‒	WGS	METAGENOMIC	ILLUMINA	Illumina HiSeq 2000	PAIRED
ERR912012	PRJEB9576	human gut metagenome	faeces	United Kingdom	Europe	‒	‒	WGS	METAGENOMIC	ILLUMINA	Illumina HiSeq 2000	PAIRED
ERR912013	PRJEB9576	human gut metagenome	faeces	United Kingdom	Europe	‒	‒	WGS	METAGENOMIC	ILLUMINA	Illumina HiSeq 2000	PAIRED
ERR912014	PRJEB9576	human gut metagenome	faeces	United Kingdom	Europe	‒	‒	WGS	METAGENOMIC	ILLUMINA	Illumina HiSeq 2000	PAIRED
ERR912015	PRJEB9576	human gut metagenome	faeces	United Kingdom	Europe	‒	‒	WGS	METAGENOMIC	ILLUMINA	Illumina HiSeq 2000	PAIRED
ERR912016	PRJEB9576	human gut metagenome	faeces	United Kingdom	Europe	‒	‒	WGS	METAGENOMIC	ILLUMINA	Illumina HiSeq 2000	PAIRED
ERR912017	PRJEB9576	human gut metagenome	faeces	United Kingdom	Europe	‒	‒	WGS	METAGENOMIC	ILLUMINA	Illumina HiSeq 2000	PAIRED
ERR912018	PRJEB9576	human gut metagenome	faeces	United Kingdom	Europe	‒	‒	WGS	METAGENOMIC	ILLUMINA	Illumina HiSeq 2000	PAIRED
ERR912019	PRJEB9576	human gut metagenome	faeces	United Kingdom	Europe	‒	‒	WGS	METAGENOMIC	ILLUMINA	Illumina HiSeq 2000	PAIRED
ERR912020	PRJEB9576	human gut metagenome	faeces	United Kingdom	Europe	‒	‒	WGS	METAGENOMIC	ILLUMINA	Illumina HiSeq 2000	PAIRED
ERR912021	PRJEB9576	human gut metagenome	faeces	United Kingdom	Europe	‒	‒	WGS	METAGENOMIC	ILLUMINA	Illumina HiSeq 2000	PAIRED
ERR912022	PRJEB9576	human gut metagenome	faeces	United Kingdom	Europe	‒	‒	WGS	METAGENOMIC	ILLUMINA	Illumina HiSeq 2000	PAIRED
ERR912023	PRJEB9576	human gut metagenome	faeces	United Kingdom	Europe	‒	‒	WGS	METAGENOMIC	ILLUMINA	Illumina HiSeq 2000	PAIRED
ERR912024	PRJEB9576	human gut metagenome	faeces	United Kingdom	Europe	‒	‒	WGS	METAGENOMIC	ILLUMINA	Illumina HiSeq 2000	PAIRED
ERR912025	PRJEB9576	human gut metagenome	faeces	United Kingdom	Europe	‒	‒	WGS	METAGENOMIC	ILLUMINA	Illumina HiSeq 2000	PAIRED
ERR912026	PRJEB9576	human gut metagenome	faeces	United Kingdom	Europe	‒	‒	WGS	METAGENOMIC	ILLUMINA	Illumina HiSeq 2000	PAIRED
ERR912027	PRJEB9576	human gut metagenome	faeces	United Kingdom	Europe	‒	‒	WGS	METAGENOMIC	ILLUMINA	Illumina HiSeq 2000	PAIRED
ERR912028	PRJEB9576	human gut metagenome	faeces	United Kingdom	Europe	‒	‒	WGS	METAGENOMIC	ILLUMINA	Illumina HiSeq 2000	PAIRED
ERR912029	PRJEB9576	human gut metagenome	faeces	United Kingdom	Europe	‒	‒	WGS	METAGENOMIC	ILLUMINA	Illumina HiSeq 2000	PAIRED
ERR912030	PRJEB9576	human gut metagenome	faeces	United Kingdom	Europe	‒	‒	WGS	METAGENOMIC	ILLUMINA	Illumina HiSeq 2000	PAIRED
ERR912031	PRJEB9576	human gut metagenome	faeces	United Kingdom	Europe	‒	‒	WGS	METAGENOMIC	ILLUMINA	Illumina HiSeq 2000	PAIRED
ERR912032	PRJEB9576	human gut metagenome	faeces	United Kingdom	Europe	‒	‒	WGS	METAGENOMIC	ILLUMINA	Illumina HiSeq 2000	PAIRED
ERR912033	PRJEB9576	human gut metagenome	faeces	United Kingdom	Europe	‒	‒	WGS	METAGENOMIC	ILLUMINA	Illumina HiSeq 2000	PAIRED
ERR912034	PRJEB9576	human gut metagenome	faeces	United Kingdom	Europe	‒	‒	WGS	METAGENOMIC	ILLUMINA	Illumina HiSeq 2000	PAIRED
ERR912035	PRJEB9576	human gut metagenome	faeces	United Kingdom	Europe	‒	‒	WGS	METAGENOMIC	ILLUMINA	Illumina HiSeq 2000	PAIRED
ERR912036	PRJEB9576	human gut metagenome	faeces	United Kingdom	Europe	‒	‒	WGS	METAGENOMIC	ILLUMINA	Illumina HiSeq 2000	PAIRED
ERR912037	PRJEB9576	human gut metagenome	faeces	United Kingdom	Europe	‒	‒	WGS	METAGENOMIC	ILLUMINA	Illumina HiSeq 2000	PAIRED
ERR912038	PRJEB9576	human gut metagenome	faeces	United Kingdom	Europe	‒	‒	WGS	METAGENOMIC	ILLUMINA	Illumina HiSeq 2000	PAIRED
ERR912039	PRJEB9576	human gut metagenome	faeces	United Kingdom	Europe	‒	‒	WGS	METAGENOMIC	ILLUMINA	Illumina HiSeq 2000	PAIRED
ERR912040	PRJEB9576	human gut metagenome	faeces	United Kingdom	Europe	‒	‒	WGS	METAGENOMIC	ILLUMINA	Illumina HiSeq 2000	PAIRED
ERR912041	PRJEB9576	human gut metagenome	faeces	United Kingdom	Europe	‒	‒	WGS	METAGENOMIC	ILLUMINA	Illumina HiSeq 2000	PAIRED
ERR912042	PRJEB9576	human gut metagenome	faeces	United Kingdom	Europe	‒	‒	WGS	METAGENOMIC	ILLUMINA	Illumina HiSeq 2000	PAIRED
ERR912043	PRJEB9576	human gut metagenome	faeces	United Kingdom	Europe	‒	‒	WGS	METAGENOMIC	ILLUMINA	Illumina HiSeq 2000	PAIRED
ERR912044	PRJEB9576	human gut metagenome	faeces	United Kingdom	Europe	‒	‒	WGS	METAGENOMIC	ILLUMINA	Illumina HiSeq 2000	PAIRED
ERR912045	PRJEB9576	human gut metagenome	faeces	United Kingdom	Europe	‒	‒	WGS	METAGENOMIC	ILLUMINA	Illumina HiSeq 2000	PAIRED
ERR912046	PRJEB9576	human gut metagenome	faeces	United Kingdom	Europe	‒	‒	WGS	METAGENOMIC	ILLUMINA	Illumina HiSeq 2000	PAIRED
ERR912047	PRJEB9576	human gut metagenome	faeces	United Kingdom	Europe	‒	‒	WGS	METAGENOMIC	ILLUMINA	Illumina HiSeq 2000	PAIRED
ERR912048	PRJEB9576	human gut metagenome	faeces	United Kingdom	Europe	‒	‒	WGS	METAGENOMIC	ILLUMINA	Illumina HiSeq 2000	PAIRED
ERR912049	PRJEB9576	human gut metagenome	faeces	United Kingdom	Europe	‒	‒	WGS	METAGENOMIC	ILLUMINA	Illumina HiSeq 2000	PAIRED
ERR912050	PRJEB9576	human gut metagenome	faeces	United Kingdom	Europe	‒	‒	WGS	METAGENOMIC	ILLUMINA	Illumina HiSeq 2000	PAIRED
ERR912051	PRJEB9576	human gut metagenome	faeces	United Kingdom	Europe	‒	‒	WGS	METAGENOMIC	ILLUMINA	Illumina HiSeq 2000	PAIRED
ERR912052	PRJEB9576	human gut metagenome	faeces	United Kingdom	Europe	‒	‒	WGS	METAGENOMIC	ILLUMINA	Illumina HiSeq 2000	PAIRED
ERR912053	PRJEB9576	human gut metagenome	faeces	United Kingdom	Europe	‒	‒	WGS	METAGENOMIC	ILLUMINA	Illumina HiSeq 2000	PAIRED
ERR912054	PRJEB9576	human gut metagenome	faeces	United Kingdom	Europe	‒	‒	WGS	METAGENOMIC	ILLUMINA	Illumina HiSeq 2000	PAIRED
ERR912055	PRJEB9576	human gut metagenome	faeces	United Kingdom	Europe	‒	‒	WGS	METAGENOMIC	ILLUMINA	Illumina HiSeq 2000	PAIRED
ERR912056	PRJEB9576	human gut metagenome	faeces	United Kingdom	Europe	‒	‒	WGS	METAGENOMIC	ILLUMINA	Illumina HiSeq 2000	PAIRED
ERR912057	PRJEB9576	human gut metagenome	faeces	United Kingdom	Europe	‒	‒	WGS	METAGENOMIC	ILLUMINA	Illumina HiSeq 2000	PAIRED
ERR912058	PRJEB9576	human gut metagenome	faeces	United Kingdom	Europe	‒	‒	WGS	METAGENOMIC	ILLUMINA	Illumina HiSeq 2000	PAIRED
ERR912059	PRJEB9576	human gut metagenome	faeces	United Kingdom	Europe	‒	‒	WGS	METAGENOMIC	ILLUMINA	Illumina HiSeq 2000	PAIRED
ERR912060	PRJEB9576	human gut metagenome	faeces	United Kingdom	Europe	‒	‒	WGS	METAGENOMIC	ILLUMINA	Illumina HiSeq 2000	PAIRED
ERR912061	PRJEB9576	human gut metagenome	faeces	United Kingdom	Europe	‒	‒	WGS	METAGENOMIC	ILLUMINA	Illumina HiSeq 2000	PAIRED
ERR912062	PRJEB9576	human gut metagenome	faeces	United Kingdom	Europe	‒	‒	WGS	METAGENOMIC	ILLUMINA	Illumina HiSeq 2000	PAIRED
ERR912063	PRJEB9576	human gut metagenome	faeces	United Kingdom	Europe	‒	‒	WGS	METAGENOMIC	ILLUMINA	Illumina HiSeq 2000	PAIRED
ERR912064	PRJEB9576	human gut metagenome	faeces	United Kingdom	Europe	‒	‒	WGS	METAGENOMIC	ILLUMINA	Illumina HiSeq 2000	PAIRED
ERR912065	PRJEB9576	human gut metagenome	faeces	United Kingdom	Europe	‒	‒	WGS	METAGENOMIC	ILLUMINA	Illumina HiSeq 2000	PAIRED
ERR912066	PRJEB9576	human gut metagenome	faeces	United Kingdom	Europe	‒	‒	WGS	METAGENOMIC	ILLUMINA	Illumina HiSeq 2000	PAIRED
ERR912067	PRJEB9576	human gut metagenome	faeces	United Kingdom	Europe	‒	‒	WGS	METAGENOMIC	ILLUMINA	Illumina HiSeq 2000	PAIRED
ERR912068	PRJEB9576	human gut metagenome	faeces	United Kingdom	Europe	‒	‒	WGS	METAGENOMIC	ILLUMINA	Illumina HiSeq 2000	PAIRED
ERR912069	PRJEB9576	human gut metagenome	faeces	United Kingdom	Europe	‒	‒	WGS	METAGENOMIC	ILLUMINA	Illumina HiSeq 2000	PAIRED
ERR912070	PRJEB9576	human gut metagenome	faeces	United Kingdom	Europe	‒	‒	WGS	METAGENOMIC	ILLUMINA	Illumina HiSeq 2000	PAIRED
ERR912071	PRJEB9576	human gut metagenome	faeces	United Kingdom	Europe	‒	‒	WGS	METAGENOMIC	ILLUMINA	Illumina HiSeq 2000	PAIRED
ERR912072	PRJEB9576	human gut metagenome	faeces	United Kingdom	Europe	‒	‒	WGS	METAGENOMIC	ILLUMINA	Illumina HiSeq 2000	PAIRED
ERR912073	PRJEB9576	human gut metagenome	faeces	United Kingdom	Europe	‒	‒	WGS	METAGENOMIC	ILLUMINA	Illumina HiSeq 2000	PAIRED
ERR912074	PRJEB9576	human gut metagenome	faeces	United Kingdom	Europe	‒	‒	WGS	METAGENOMIC	ILLUMINA	Illumina HiSeq 2000	PAIRED
ERR912075	PRJEB9576	human gut metagenome	faeces	United Kingdom	Europe	‒	‒	WGS	METAGENOMIC	ILLUMINA	Illumina HiSeq 2000	PAIRED
ERR912076	PRJEB9576	human gut metagenome	faeces	United Kingdom	Europe	‒	‒	WGS	METAGENOMIC	ILLUMINA	Illumina HiSeq 2000	PAIRED
ERR912077	PRJEB9576	human gut metagenome	faeces	United Kingdom	Europe	‒	‒	WGS	METAGENOMIC	ILLUMINA	Illumina HiSeq 2000	PAIRED
ERR912078	PRJEB9576	human gut metagenome	faeces	United Kingdom	Europe	‒	‒	WGS	METAGENOMIC	ILLUMINA	Illumina HiSeq 2000	PAIRED
ERR912079	PRJEB9576	human gut metagenome	faeces	United Kingdom	Europe	‒	‒	WGS	METAGENOMIC	ILLUMINA	Illumina HiSeq 2000	PAIRED
ERR912080	PRJEB9576	human gut metagenome	faeces	United Kingdom	Europe	‒	‒	WGS	METAGENOMIC	ILLUMINA	Illumina HiSeq 2000	PAIRED
ERR912081	PRJEB9576	human gut metagenome	faeces	United Kingdom	Europe	‒	‒	WGS	METAGENOMIC	ILLUMINA	Illumina HiSeq 2000	PAIRED
ERR912082	PRJEB9576	human gut metagenome	faeces	United Kingdom	Europe	‒	‒	WGS	METAGENOMIC	ILLUMINA	Illumina HiSeq 2000	PAIRED
ERR912083	PRJEB9576	human gut metagenome	faeces	United Kingdom	Europe	‒	‒	WGS	METAGENOMIC	ILLUMINA	Illumina HiSeq 2000	PAIRED
ERR912084	PRJEB9576	human gut metagenome	faeces	United Kingdom	Europe	‒	‒	WGS	METAGENOMIC	ILLUMINA	Illumina HiSeq 2000	PAIRED
ERR912085	PRJEB9576	human gut metagenome	faeces	United Kingdom	Europe	‒	‒	WGS	METAGENOMIC	ILLUMINA	Illumina HiSeq 2000	PAIRED
ERR912086	PRJEB9576	human gut metagenome	faeces	United Kingdom	Europe	‒	‒	WGS	METAGENOMIC	ILLUMINA	Illumina HiSeq 2000	PAIRED
ERR912087	PRJEB9576	human gut metagenome	faeces	United Kingdom	Europe	‒	‒	WGS	METAGENOMIC	ILLUMINA	Illumina HiSeq 2000	PAIRED
ERR912088	PRJEB9576	human gut metagenome	faeces	United Kingdom	Europe	‒	‒	WGS	METAGENOMIC	ILLUMINA	Illumina HiSeq 2000	PAIRED
ERR912089	PRJEB9576	human gut metagenome	faeces	United Kingdom	Europe	‒	‒	WGS	METAGENOMIC	ILLUMINA	Illumina HiSeq 2000	PAIRED
ERR912090	PRJEB9576	human gut metagenome	faeces	United Kingdom	Europe	‒	‒	WGS	METAGENOMIC	ILLUMINA	Illumina HiSeq 2000	PAIRED
ERR912091	PRJEB9576	human gut metagenome	faeces	United Kingdom	Europe	‒	‒	WGS	METAGENOMIC	ILLUMINA	Illumina HiSeq 2000	PAIRED
ERR912092	PRJEB9576	human gut metagenome	faeces	United Kingdom	Europe	‒	‒	WGS	METAGENOMIC	ILLUMINA	Illumina HiSeq 2000	PAIRED
ERR912093	PRJEB9576	human gut metagenome	faeces	United Kingdom	Europe	‒	‒	WGS	METAGENOMIC	ILLUMINA	Illumina HiSeq 2000	PAIRED
ERR912094	PRJEB9576	human gut metagenome	faeces	United Kingdom	Europe	‒	‒	WGS	METAGENOMIC	ILLUMINA	Illumina HiSeq 2000	PAIRED
ERR912095	PRJEB9576	human gut metagenome	faeces	United Kingdom	Europe	‒	‒	WGS	METAGENOMIC	ILLUMINA	Illumina HiSeq 2000	PAIRED
ERR912096	PRJEB9576	human gut metagenome	faeces	United Kingdom	Europe	‒	‒	WGS	METAGENOMIC	ILLUMINA	Illumina HiSeq 2000	PAIRED
ERR912097	PRJEB9576	human gut metagenome	faeces	United Kingdom	Europe	‒	‒	WGS	METAGENOMIC	ILLUMINA	Illumina HiSeq 2000	PAIRED
ERR912098	PRJEB9576	human gut metagenome	faeces	United Kingdom	Europe	‒	‒	WGS	METAGENOMIC	ILLUMINA	Illumina HiSeq 2000	PAIRED
ERR912099	PRJEB9576	human gut metagenome	faeces	United Kingdom	Europe	‒	‒	WGS	METAGENOMIC	ILLUMINA	Illumina HiSeq 2000	PAIRED
ERR912100	PRJEB9576	human gut metagenome	faeces	United Kingdom	Europe	‒	‒	WGS	METAGENOMIC	ILLUMINA	Illumina HiSeq 2000	PAIRED
ERR912101	PRJEB9576	human gut metagenome	faeces	United Kingdom	Europe	‒	‒	WGS	METAGENOMIC	ILLUMINA	Illumina HiSeq 2000	PAIRED
ERR912102	PRJEB9576	human gut metagenome	faeces	United Kingdom	Europe	‒	‒	WGS	METAGENOMIC	ILLUMINA	Illumina HiSeq 2000	PAIRED
ERR912103	PRJEB9576	human gut metagenome	faeces	United Kingdom	Europe	‒	‒	WGS	METAGENOMIC	ILLUMINA	Illumina HiSeq 2000	PAIRED
ERR912104	PRJEB9576	human gut metagenome	faeces	United Kingdom	Europe	‒	‒	WGS	METAGENOMIC	ILLUMINA	Illumina HiSeq 2000	PAIRED
ERR912105	PRJEB9576	human gut metagenome	faeces	United Kingdom	Europe	‒	‒	WGS	METAGENOMIC	ILLUMINA	Illumina HiSeq 2000	PAIRED
ERR912106	PRJEB9576	human gut metagenome	faeces	United Kingdom	Europe	‒	‒	WGS	METAGENOMIC	ILLUMINA	Illumina HiSeq 2000	PAIRED
ERR912107	PRJEB9576	human gut metagenome	faeces	United Kingdom	Europe	‒	‒	WGS	METAGENOMIC	ILLUMINA	Illumina HiSeq 2000	PAIRED
ERR912108	PRJEB9576	human gut metagenome	faeces	United Kingdom	Europe	‒	‒	WGS	METAGENOMIC	ILLUMINA	Illumina HiSeq 2000	PAIRED
ERR912109	PRJEB9576	human gut metagenome	faeces	United Kingdom	Europe	‒	‒	WGS	METAGENOMIC	ILLUMINA	Illumina HiSeq 2000	PAIRED
ERR912110	PRJEB9576	human gut metagenome	faeces	United Kingdom	Europe	‒	‒	WGS	METAGENOMIC	ILLUMINA	Illumina HiSeq 2000	PAIRED
ERR912111	PRJEB9576	human gut metagenome	faeces	United Kingdom	Europe	‒	‒	WGS	METAGENOMIC	ILLUMINA	Illumina HiSeq 2000	PAIRED
ERR912112	PRJEB9576	human gut metagenome	faeces	United Kingdom	Europe	‒	‒	WGS	METAGENOMIC	ILLUMINA	Illumina HiSeq 2000	PAIRED
ERR912113	PRJEB9576	human gut metagenome	faeces	United Kingdom	Europe	‒	‒	WGS	METAGENOMIC	ILLUMINA	Illumina HiSeq 2000	PAIRED
ERR912114	PRJEB9576	human gut metagenome	faeces	United Kingdom	Europe	‒	‒	WGS	METAGENOMIC	ILLUMINA	Illumina HiSeq 2000	PAIRED
ERR912115	PRJEB9576	human gut metagenome	faeces	United Kingdom	Europe	‒	‒	WGS	METAGENOMIC	ILLUMINA	Illumina HiSeq 2000	PAIRED
ERR912116	PRJEB9576	human gut metagenome	faeces	United Kingdom	Europe	‒	‒	WGS	METAGENOMIC	ILLUMINA	Illumina HiSeq 2000	PAIRED
ERR912117	PRJEB9576	human gut metagenome	faeces	United Kingdom	Europe	‒	‒	WGS	METAGENOMIC	ILLUMINA	Illumina HiSeq 2000	PAIRED
ERR912118	PRJEB9576	human gut metagenome	faeces	United Kingdom	Europe	‒	‒	WGS	METAGENOMIC	ILLUMINA	Illumina HiSeq 2000	PAIRED
ERR912119	PRJEB9576	human gut metagenome	faeces	United Kingdom	Europe	‒	‒	WGS	METAGENOMIC	ILLUMINA	Illumina HiSeq 2000	PAIRED
ERR912120	PRJEB9576	human gut metagenome	faeces	United Kingdom	Europe	‒	‒	WGS	METAGENOMIC	ILLUMINA	Illumina HiSeq 2000	PAIRED
ERR912121	PRJEB9576	human gut metagenome	faeces	United Kingdom	Europe	‒	‒	WGS	METAGENOMIC	ILLUMINA	Illumina HiSeq 2000	PAIRED
ERR912122	PRJEB9576	human gut metagenome	faeces	United Kingdom	Europe	‒	‒	WGS	METAGENOMIC	ILLUMINA	Illumina HiSeq 2000	PAIRED
ERR912123	PRJEB9576	human gut metagenome	faeces	United Kingdom	Europe	‒	‒	WGS	METAGENOMIC	ILLUMINA	Illumina HiSeq 2000	PAIRED
ERR912124	PRJEB9576	human gut metagenome	faeces	United Kingdom	Europe	‒	‒	WGS	METAGENOMIC	ILLUMINA	Illumina HiSeq 2000	PAIRED
ERR912125	PRJEB9576	human gut metagenome	faeces	United Kingdom	Europe	‒	‒	WGS	METAGENOMIC	ILLUMINA	Illumina HiSeq 2000	PAIRED
ERR912126	PRJEB9576	human gut metagenome	faeces	United Kingdom	Europe	‒	‒	WGS	METAGENOMIC	ILLUMINA	Illumina HiSeq 2000	PAIRED
ERR912127	PRJEB9576	human gut metagenome	faeces	United Kingdom	Europe	‒	‒	WGS	METAGENOMIC	ILLUMINA	Illumina HiSeq 2000	PAIRED
ERR912128	PRJEB9576	human gut metagenome	faeces	United Kingdom	Europe	‒	‒	WGS	METAGENOMIC	ILLUMINA	Illumina HiSeq 2000	PAIRED
ERR912129	PRJEB9576	human gut metagenome	faeces	United Kingdom	Europe	‒	‒	WGS	METAGENOMIC	ILLUMINA	Illumina HiSeq 2000	PAIRED
ERR912130	PRJEB9576	human gut metagenome	faeces	United Kingdom	Europe	‒	‒	WGS	METAGENOMIC	ILLUMINA	Illumina HiSeq 2000	PAIRED
ERR912131	PRJEB9576	human gut metagenome	faeces	United Kingdom	Europe	‒	‒	WGS	METAGENOMIC	ILLUMINA	Illumina HiSeq 2000	PAIRED
ERR912132	PRJEB9576	human gut metagenome	faeces	United Kingdom	Europe	‒	‒	WGS	METAGENOMIC	ILLUMINA	Illumina HiSeq 2000	PAIRED
ERR912133	PRJEB9576	human gut metagenome	faeces	United Kingdom	Europe	‒	‒	WGS	METAGENOMIC	ILLUMINA	Illumina HiSeq 2000	PAIRED
ERR912134	PRJEB9576	human gut metagenome	faeces	United Kingdom	Europe	‒	‒	WGS	METAGENOMIC	ILLUMINA	Illumina HiSeq 2000	PAIRED
ERR912135	PRJEB9576	human gut metagenome	faeces	United Kingdom	Europe	‒	‒	WGS	METAGENOMIC	ILLUMINA	Illumina HiSeq 2000	PAIRED
ERR912136	PRJEB9576	human gut metagenome	faeces	United Kingdom	Europe	‒	‒	WGS	METAGENOMIC	ILLUMINA	Illumina HiSeq 2000	PAIRED
ERR912137	PRJEB9576	human gut metagenome	faeces	United Kingdom	Europe	‒	‒	WGS	METAGENOMIC	ILLUMINA	Illumina HiSeq 2000	PAIRED
ERR912138	PRJEB9576	human gut metagenome	faeces	United Kingdom	Europe	‒	‒	WGS	METAGENOMIC	ILLUMINA	Illumina HiSeq 2000	PAIRED
ERR912139	PRJEB9576	human gut metagenome	faeces	United Kingdom	Europe	‒	‒	WGS	METAGENOMIC	ILLUMINA	Illumina HiSeq 2000	PAIRED
ERR912140	PRJEB9576	human gut metagenome	faeces	United Kingdom	Europe	‒	‒	WGS	METAGENOMIC	ILLUMINA	Illumina HiSeq 2000	PAIRED
ERR912141	PRJEB9576	human gut metagenome	faeces	United Kingdom	Europe	‒	‒	WGS	METAGENOMIC	ILLUMINA	Illumina HiSeq 2000	PAIRED
ERR912142	PRJEB9576	human gut metagenome	faeces	United Kingdom	Europe	‒	‒	WGS	METAGENOMIC	ILLUMINA	Illumina HiSeq 2000	PAIRED
ERR912143	PRJEB9576	human gut metagenome	faeces	United Kingdom	Europe	‒	‒	WGS	METAGENOMIC	ILLUMINA	Illumina HiSeq 2000	PAIRED
ERR912144	PRJEB9576	human gut metagenome	faeces	United Kingdom	Europe	‒	‒	WGS	METAGENOMIC	ILLUMINA	Illumina HiSeq 2000	PAIRED
ERR912145	PRJEB9576	human gut metagenome	faeces	United Kingdom	Europe	‒	‒	WGS	METAGENOMIC	ILLUMINA	Illumina HiSeq 2000	PAIRED
ERR912146	PRJEB9576	human gut metagenome	faeces	United Kingdom	Europe	‒	‒	WGS	METAGENOMIC	ILLUMINA	Illumina HiSeq 2000	PAIRED
ERR912147	PRJEB9576	human gut metagenome	faeces	United Kingdom	Europe	‒	‒	WGS	METAGENOMIC	ILLUMINA	Illumina HiSeq 2000	PAIRED
ERR912148	PRJEB9576	human gut metagenome	faeces	United Kingdom	Europe	‒	‒	WGS	METAGENOMIC	ILLUMINA	Illumina HiSeq 2000	PAIRED
ERR912149	PRJEB9576	human gut metagenome	faeces	United Kingdom	Europe	‒	‒	WGS	METAGENOMIC	ILLUMINA	Illumina HiSeq 2000	PAIRED
ERR912150	PRJEB9576	human gut metagenome	faeces	United Kingdom	Europe	‒	‒	WGS	METAGENOMIC	ILLUMINA	Illumina HiSeq 2000	PAIRED
ERR912151	PRJEB9576	human gut metagenome	faeces	United Kingdom	Europe	‒	‒	WGS	METAGENOMIC	ILLUMINA	Illumina HiSeq 2000	PAIRED
ERR912152	PRJEB9576	human gut metagenome	faeces	United Kingdom	Europe	‒	‒	WGS	METAGENOMIC	ILLUMINA	Illumina HiSeq 2000	PAIRED
ERR912153	PRJEB9576	human gut metagenome	faeces	United Kingdom	Europe	‒	‒	WGS	METAGENOMIC	ILLUMINA	Illumina HiSeq 2000	PAIRED
ERR912154	PRJEB9576	human gut metagenome	faeces	United Kingdom	Europe	‒	‒	WGS	METAGENOMIC	ILLUMINA	Illumina HiSeq 2000	PAIRED
ERR912155	PRJEB9576	human gut metagenome	faeces	United Kingdom	Europe	‒	‒	WGS	METAGENOMIC	ILLUMINA	Illumina HiSeq 2000	PAIRED
ERR912156	PRJEB9576	human gut metagenome	faeces	United Kingdom	Europe	‒	‒	WGS	METAGENOMIC	ILLUMINA	Illumina HiSeq 2000	PAIRED
ERR912157	PRJEB9576	human gut metagenome	faeces	United Kingdom	Europe	‒	‒	WGS	METAGENOMIC	ILLUMINA	Illumina HiSeq 2000	PAIRED
ERR912158	PRJEB9576	human gut metagenome	faeces	United Kingdom	Europe	‒	‒	WGS	METAGENOMIC	ILLUMINA	Illumina HiSeq 2000	PAIRED
ERR912159	PRJEB9576	human gut metagenome	faeces	United Kingdom	Europe	‒	‒	WGS	METAGENOMIC	ILLUMINA	Illumina HiSeq 2000	PAIRED
ERR912160	PRJEB9576	human gut metagenome	faeces	United Kingdom	Europe	‒	‒	WGS	METAGENOMIC	ILLUMINA	Illumina HiSeq 2000	PAIRED
ERR912161	PRJEB9576	human gut metagenome	faeces	United Kingdom	Europe	‒	‒	WGS	METAGENOMIC	ILLUMINA	Illumina HiSeq 2000	PAIRED
ERR912162	PRJEB9576	human gut metagenome	faeces	United Kingdom	Europe	‒	‒	WGS	METAGENOMIC	ILLUMINA	Illumina HiSeq 2000	PAIRED
ERR912163	PRJEB9576	human gut metagenome	faeces	United Kingdom	Europe	‒	‒	WGS	METAGENOMIC	ILLUMINA	Illumina HiSeq 2000	PAIRED
ERR912164	PRJEB9576	human gut metagenome	faeces	United Kingdom	Europe	‒	‒	WGS	METAGENOMIC	ILLUMINA	Illumina HiSeq 2000	PAIRED
ERR912165	PRJEB9576	human gut metagenome	faeces	United Kingdom	Europe	‒	‒	WGS	METAGENOMIC	ILLUMINA	Illumina HiSeq 2000	PAIRED
ERR912166	PRJEB9576	human gut metagenome	faeces	United Kingdom	Europe	‒	‒	WGS	METAGENOMIC	ILLUMINA	Illumina HiSeq 2000	PAIRED
ERR912167	PRJEB9576	human gut metagenome	faeces	United Kingdom	Europe	‒	‒	WGS	METAGENOMIC	ILLUMINA	Illumina HiSeq 2000	PAIRED
ERR912168	PRJEB9576	human gut metagenome	faeces	United Kingdom	Europe	‒	‒	WGS	METAGENOMIC	ILLUMINA	Illumina HiSeq 2000	PAIRED
ERR912169	PRJEB9576	human gut metagenome	faeces	United Kingdom	Europe	‒	‒	WGS	METAGENOMIC	ILLUMINA	Illumina HiSeq 2000	PAIRED
ERR912170	PRJEB9576	human gut metagenome	faeces	United Kingdom	Europe	‒	‒	WGS	METAGENOMIC	ILLUMINA	Illumina HiSeq 2000	PAIRED
ERR912171	PRJEB9576	human gut metagenome	faeces	United Kingdom	Europe	‒	‒	WGS	METAGENOMIC	ILLUMINA	Illumina HiSeq 2000	PAIRED
ERR912172	PRJEB9576	human gut metagenome	faeces	United Kingdom	Europe	‒	‒	WGS	METAGENOMIC	ILLUMINA	Illumina HiSeq 2000	PAIRED
ERR912173	PRJEB9576	human gut metagenome	faeces	United Kingdom	Europe	‒	‒	WGS	METAGENOMIC	ILLUMINA	Illumina HiSeq 2000	PAIRED
ERR912174	PRJEB9576	human gut metagenome	faeces	United Kingdom	Europe	‒	‒	WGS	METAGENOMIC	ILLUMINA	Illumina HiSeq 2000	PAIRED
ERR912175	PRJEB9576	human gut metagenome	faeces	United Kingdom	Europe	‒	‒	WGS	METAGENOMIC	ILLUMINA	Illumina HiSeq 2000	PAIRED
ERR912176	PRJEB9576	human gut metagenome	faeces	United Kingdom	Europe	‒	‒	WGS	METAGENOMIC	ILLUMINA	Illumina HiSeq 2000	PAIRED
ERR912177	PRJEB9576	human gut metagenome	faeces	United Kingdom	Europe	‒	‒	WGS	METAGENOMIC	ILLUMINA	Illumina HiSeq 2000	PAIRED
ERR912178	PRJEB9576	human gut metagenome	faeces	United Kingdom	Europe	‒	‒	WGS	METAGENOMIC	ILLUMINA	Illumina HiSeq 2000	PAIRED
ERR912179	PRJEB9576	human gut metagenome	faeces	United Kingdom	Europe	‒	‒	WGS	METAGENOMIC	ILLUMINA	Illumina HiSeq 2000	PAIRED
ERR912180	PRJEB9576	human gut metagenome	faeces	United Kingdom	Europe	‒	‒	WGS	METAGENOMIC	ILLUMINA	Illumina HiSeq 2000	PAIRED
ERR912181	PRJEB9576	human gut metagenome	faeces	United Kingdom	Europe	‒	‒	WGS	METAGENOMIC	ILLUMINA	Illumina HiSeq 2000	PAIRED
ERR912182	PRJEB9576	human gut metagenome	faeces	United Kingdom	Europe	‒	‒	WGS	METAGENOMIC	ILLUMINA	Illumina HiSeq 2000	PAIRED
ERR912183	PRJEB9576	human gut metagenome	faeces	United Kingdom	Europe	‒	‒	WGS	METAGENOMIC	ILLUMINA	Illumina HiSeq 2000	PAIRED
ERR912184	PRJEB9576	human gut metagenome	faeces	United Kingdom	Europe	‒	‒	WGS	METAGENOMIC	ILLUMINA	Illumina HiSeq 2000	PAIRED
ERR912185	PRJEB9576	human gut metagenome	faeces	United Kingdom	Europe	‒	‒	WGS	METAGENOMIC	ILLUMINA	Illumina HiSeq 2000	PAIRED
ERR912186	PRJEB9576	human gut metagenome	faeces	United Kingdom	Europe	‒	‒	WGS	METAGENOMIC	ILLUMINA	Illumina HiSeq 2000	PAIRED
ERR912187	PRJEB9576	human gut metagenome	faeces	United Kingdom	Europe	‒	‒	WGS	METAGENOMIC	ILLUMINA	Illumina HiSeq 2000	PAIRED
ERR912188	PRJEB9576	human gut metagenome	faeces	United Kingdom	Europe	‒	‒	WGS	METAGENOMIC	ILLUMINA	Illumina HiSeq 2000	PAIRED
ERR912189	PRJEB9576	human gut metagenome	faeces	United Kingdom	Europe	‒	‒	WGS	METAGENOMIC	ILLUMINA	Illumina HiSeq 2000	PAIRED
ERR912190	PRJEB9576	human gut metagenome	faeces	United Kingdom	Europe	‒	‒	WGS	METAGENOMIC	ILLUMINA	Illumina HiSeq 2000	PAIRED
ERR912191	PRJEB9576	human gut metagenome	faeces	United Kingdom	Europe	‒	‒	WGS	METAGENOMIC	ILLUMINA	Illumina HiSeq 2000	PAIRED
ERR912192	PRJEB9576	human gut metagenome	faeces	United Kingdom	Europe	‒	‒	WGS	METAGENOMIC	ILLUMINA	Illumina HiSeq 2000	PAIRED
ERR912193	PRJEB9576	human gut metagenome	faeces	United Kingdom	Europe	‒	‒	WGS	METAGENOMIC	ILLUMINA	Illumina HiSeq 2000	PAIRED
ERR912194	PRJEB9576	human gut metagenome	faeces	United Kingdom	Europe	‒	‒	WGS	METAGENOMIC	ILLUMINA	Illumina HiSeq 2000	PAIRED
ERR912195	PRJEB9576	human gut metagenome	faeces	United Kingdom	Europe	‒	‒	WGS	METAGENOMIC	ILLUMINA	Illumina HiSeq 2000	PAIRED
ERR912196	PRJEB9576	human gut metagenome	faeces	United Kingdom	Europe	‒	‒	WGS	METAGENOMIC	ILLUMINA	Illumina HiSeq 2000	PAIRED
ERR912197	PRJEB9576	human gut metagenome	faeces	United Kingdom	Europe	‒	‒	WGS	METAGENOMIC	ILLUMINA	Illumina HiSeq 2000	PAIRED
ERR912198	PRJEB9576	human gut metagenome	faeces	United Kingdom	Europe	‒	‒	WGS	METAGENOMIC	ILLUMINA	Illumina HiSeq 2000	PAIRED
ERR912199	PRJEB9576	human gut metagenome	faeces	United Kingdom	Europe	‒	‒	WGS	METAGENOMIC	ILLUMINA	Illumina HiSeq 2000	PAIRED
ERR912200	PRJEB9576	human gut metagenome	faeces	United Kingdom	Europe	‒	‒	WGS	METAGENOMIC	ILLUMINA	Illumina HiSeq 2000	PAIRED
ERR912201	PRJEB9576	human gut metagenome	faeces	United Kingdom	Europe	‒	‒	WGS	METAGENOMIC	ILLUMINA	Illumina HiSeq 2000	PAIRED
ERR912202	PRJEB9576	human gut metagenome	faeces	United Kingdom	Europe	‒	‒	WGS	METAGENOMIC	ILLUMINA	Illumina HiSeq 2000	PAIRED
SRR2912775	PRJNA299502	human gut metagenome	feces	USA	North America	‒	‒	WGS	METAGENOMIC	ILLUMINA	Illumina HiSeq 2000	PAIRED
SRR2912776	PRJNA299502	human gut metagenome	feces	USA	North America	‒	‒	WGS	METAGENOMIC	ILLUMINA	Illumina HiSeq 2000	PAIRED
SRR2912777	PRJNA299502	human gut metagenome	feces	USA	North America	‒	‒	WGS	METAGENOMIC	ILLUMINA	Illumina HiSeq 2000	PAIRED
SRR2912778	PRJNA299502	human gut metagenome	feces	USA	North America	‒	‒	WGS	METAGENOMIC	ILLUMINA	Illumina HiSeq 2000	PAIRED
SRR2912779	PRJNA299502	human gut metagenome	feces	USA	North America	‒	‒	WGS	METAGENOMIC	ILLUMINA	Illumina HiSeq 2000	PAIRED
SRR2912780	PRJNA299502	human gut metagenome	feces	USA	North America	‒	‒	WGS	METAGENOMIC	ILLUMINA	Illumina HiSeq 2000	PAIRED
SRR2912781	PRJNA299502	human gut metagenome	feces	USA	North America	‒	‒	WGS	METAGENOMIC	ILLUMINA	Illumina HiSeq 2000	PAIRED
SRR2912782	PRJNA299502	human gut metagenome	feces	USA	North America	‒	‒	WGS	METAGENOMIC	ILLUMINA	Illumina HiSeq 2000	PAIRED
SRR2912783	PRJNA299502	human gut metagenome	feces	USA	North America	‒	‒	WGS	METAGENOMIC	ILLUMINA	Illumina HiSeq 2000	PAIRED
SRR2912784	PRJNA299502	human gut metagenome	feces	USA	North America	‒	‒	WGS	METAGENOMIC	ILLUMINA	Illumina HiSeq 2000	PAIRED
SRR2912785	PRJNA299502	human gut metagenome	feces	USA	North America	‒	‒	WGS	METAGENOMIC	ILLUMINA	Illumina HiSeq 2000	PAIRED
SRR2912786	PRJNA299502	human gut metagenome	feces	USA	North America	‒	‒	WGS	METAGENOMIC	ILLUMINA	Illumina HiSeq 2000	PAIRED
SRR2912787	PRJNA299502	human gut metagenome	feces	USA	North America	‒	‒	WGS	METAGENOMIC	ILLUMINA	Illumina HiSeq 2000	PAIRED
SRR2912788	PRJNA299502	human gut metagenome	feces	USA	North America	‒	‒	WGS	METAGENOMIC	ILLUMINA	Illumina HiSeq 2000	PAIRED
SRR2912789	PRJNA299502	human gut metagenome	feces	USA	North America	‒	‒	WGS	METAGENOMIC	ILLUMINA	Illumina HiSeq 2000	PAIRED
SRR2912790	PRJNA299502	human gut metagenome	feces	USA	North America	‒	‒	WGS	METAGENOMIC	ILLUMINA	Illumina HiSeq 2000	PAIRED
SRR2912791	PRJNA299502	human gut metagenome	feces	USA	North America	‒	‒	WGS	METAGENOMIC	ILLUMINA	Illumina HiSeq 2000	PAIRED
SRR2912792	PRJNA299502	human gut metagenome	feces	USA	North America	‒	‒	WGS	METAGENOMIC	ILLUMINA	Illumina HiSeq 2000	PAIRED
SRR2912793	PRJNA299502	human gut metagenome	feces	USA	North America	‒	‒	WGS	METAGENOMIC	ILLUMINA	Illumina HiSeq 2000	PAIRED
SRR2912794	PRJNA299502	human gut metagenome	feces	USA	North America	‒	‒	WGS	METAGENOMIC	ILLUMINA	Illumina HiSeq 2000	PAIRED
SRR2912795	PRJNA299502	human gut metagenome	feces	USA	North America	‒	‒	WGS	METAGENOMIC	ILLUMINA	Illumina HiSeq 2000	PAIRED
SRR2912796	PRJNA299502	human gut metagenome	feces	USA	North America	‒	‒	WGS	METAGENOMIC	ILLUMINA	Illumina HiSeq 2000	PAIRED
SRR2912797	PRJNA299502	human gut metagenome	feces	USA	North America	‒	‒	WGS	METAGENOMIC	ILLUMINA	Illumina HiSeq 2000	PAIRED
SRR2912798	PRJNA299502	human gut metagenome	feces	USA	North America	‒	‒	WGS	METAGENOMIC	ILLUMINA	Illumina HiSeq 2000	PAIRED
SRR2912799	PRJNA299502	human gut metagenome	feces	USA	North America	‒	‒	WGS	METAGENOMIC	ILLUMINA	Illumina HiSeq 2000	PAIRED
SRR2912800	PRJNA299502	human gut metagenome	feces	USA	North America	‒	‒	WGS	METAGENOMIC	ILLUMINA	Illumina HiSeq 2000	PAIRED
SRR2912801	PRJNA299502	human gut metagenome	feces	USA	North America	‒	‒	WGS	METAGENOMIC	ILLUMINA	Illumina HiSeq 2000	PAIRED
SRR2912802	PRJNA299502	human gut metagenome	feces	USA	North America	‒	‒	WGS	METAGENOMIC	ILLUMINA	Illumina HiSeq 2000	PAIRED
SRR2912803	PRJNA299502	human gut metagenome	feces	USA	North America	‒	‒	WGS	METAGENOMIC	ILLUMINA	Illumina HiSeq 2000	PAIRED
SRR2912804	PRJNA299502	human gut metagenome	feces	USA	North America	‒	‒	WGS	METAGENOMIC	ILLUMINA	Illumina HiSeq 2000	PAIRED
SRR2912805	PRJNA299502	human gut metagenome	feces	USA	North America	‒	‒	WGS	METAGENOMIC	ILLUMINA	Illumina HiSeq 2000	PAIRED
SRR2912806	PRJNA299502	human gut metagenome	feces	USA	North America	‒	‒	WGS	METAGENOMIC	ILLUMINA	Illumina HiSeq 2000	PAIRED
SRR2912807	PRJNA299502	human gut metagenome	feces	USA	North America	‒	‒	WGS	METAGENOMIC	ILLUMINA	Illumina HiSeq 2000	PAIRED
SRR2912808	PRJNA299502	human gut metagenome	feces	USA	North America	‒	‒	WGS	METAGENOMIC	ILLUMINA	Illumina HiSeq 2000	PAIRED
SRR2912809	PRJNA299502	human gut metagenome	feces	USA	North America	‒	‒	WGS	METAGENOMIC	ILLUMINA	Illumina HiSeq 2000	PAIRED
SRR2912810	PRJNA299502	human gut metagenome	feces	USA	North America	‒	‒	WGS	METAGENOMIC	ILLUMINA	Illumina HiSeq 2000	PAIRED
SRR2912811	PRJNA299502	human gut metagenome	feces	USA	North America	‒	‒	WGS	METAGENOMIC	ILLUMINA	Illumina HiSeq 2000	PAIRED
SRR3212985	PRJNA314481	human gut metagenome	stool	‒	‒	54	female	WGA	METAGENOMIC	ILLUMINA	Illumina MiSeq	PAIRED
SRR3212986	PRJNA314481	human gut metagenome	stool	‒	‒	64	female	WGA	METAGENOMIC	ILLUMINA	Illumina MiSeq	PAIRED
SRR3212988	PRJNA314481	human gut metagenome	stool	‒	‒	59	male	WGA	METAGENOMIC	ILLUMINA	Illumina MiSeq	PAIRED
SRR3212989	PRJNA314481	human gut metagenome	stool	‒	‒	59	female	WGA	METAGENOMIC	ILLUMINA	Illumina MiSeq	PAIRED
SRR3212991	PRJNA314481	human gut metagenome	stool	‒	‒	59	female	WGA	METAGENOMIC	ILLUMINA	Illumina MiSeq	PAIRED
SRR3212992	PRJNA314481	human gut metagenome	stool	‒	‒	54	female	WGA	METAGENOMIC	ILLUMINA	Illumina MiSeq	PAIRED
SRR3212993	PRJNA314481	human gut metagenome	stool	‒	‒	58	male	WGA	METAGENOMIC	ILLUMINA	Illumina MiSeq	PAIRED
SRR3212995	PRJNA314481	human gut metagenome	stool	‒	‒	73	male	WGA	METAGENOMIC	ILLUMINA	Illumina MiSeq	PAIRED
SRR3213019	PRJNA314481	human gut metagenome	stool	‒	‒	71	female	WGA	METAGENOMIC	ILLUMINA	Illumina MiSeq	PAIRED
SRR3213020	PRJNA314481	human gut metagenome	stool	‒	‒	54	female	WGA	METAGENOMIC	ILLUMINA	Illumina MiSeq	PAIRED
SRR5127397	PRJNA319574	human gut metagenome	feces	Netherlands	Europe	‒	‒	WGS	METAGENOMIC	ILLUMINA	Illumina HiSeq 2000	PAIRED
SRR5127408	PRJNA319574	human gut metagenome	feces	Netherlands	Europe	‒	‒	WGS	METAGENOMIC	ILLUMINA	Illumina HiSeq 2000	PAIRED
SRR5127410	PRJNA319574	human gut metagenome	feces	Netherlands	Europe	‒	‒	WGS	METAGENOMIC	ILLUMINA	Illumina HiSeq 2000	PAIRED
SRR5127413	PRJNA319574	human gut metagenome	feces	Netherlands	Europe	‒	‒	WGS	METAGENOMIC	ILLUMINA	Illumina HiSeq 2000	PAIRED
SRR5127414	PRJNA319574	human gut metagenome	feces	Netherlands	Europe	‒	‒	WGS	METAGENOMIC	ILLUMINA	Illumina HiSeq 2000	PAIRED
SRR5127418	PRJNA319574	human gut metagenome	feces	Netherlands	Europe	‒	‒	WGS	METAGENOMIC	ILLUMINA	Illumina HiSeq 2000	PAIRED
SRR5127422	PRJNA319574	human gut metagenome	feces	Netherlands	Europe	‒	‒	WGS	METAGENOMIC	ILLUMINA	Illumina HiSeq 2000	PAIRED
SRR5127428	PRJNA319574	human gut metagenome	feces	Netherlands	Europe	‒	‒	WGS	METAGENOMIC	ILLUMINA	Illumina HiSeq 2000	PAIRED
SRR5127440	PRJNA319574	human gut metagenome	feces	Netherlands	Europe	‒	‒	WGS	METAGENOMIC	ILLUMINA	Illumina HiSeq 2000	PAIRED
SRR5127442	PRJNA319574	human gut metagenome	feces	Netherlands	Europe	‒	‒	WGS	METAGENOMIC	ILLUMINA	Illumina HiSeq 2000	PAIRED
SRR5127444	PRJNA319574	human gut metagenome	feces	Netherlands	Europe	‒	‒	WGS	METAGENOMIC	ILLUMINA	Illumina HiSeq 2000	PAIRED
SRR5127451	PRJNA319574	human gut metagenome	feces	Netherlands	Europe	‒	‒	WGS	METAGENOMIC	ILLUMINA	Illumina HiSeq 2000	PAIRED
SRR5127452	PRJNA319574	human gut metagenome	feces	Netherlands	Europe	‒	‒	WGS	METAGENOMIC	ILLUMINA	Illumina HiSeq 2000	PAIRED
SRR5127453	PRJNA319574	human gut metagenome	feces	Netherlands	Europe	‒	‒	WGS	METAGENOMIC	ILLUMINA	Illumina HiSeq 2000	PAIRED
SRR5127456	PRJNA319574	human gut metagenome	feces	Netherlands	Europe	‒	‒	WGS	METAGENOMIC	ILLUMINA	Illumina HiSeq 2000	PAIRED
SRR5127463	PRJNA319574	human gut metagenome	feces	Netherlands	Europe	‒	‒	WGS	METAGENOMIC	ILLUMINA	Illumina HiSeq 2000	PAIRED
SRR5127465	PRJNA319574	human gut metagenome	feces	Netherlands	Europe	‒	‒	WGS	METAGENOMIC	ILLUMINA	Illumina HiSeq 2000	PAIRED
SRR5127469	PRJNA319574	human gut metagenome	feces	Netherlands	Europe	‒	‒	WGS	METAGENOMIC	ILLUMINA	Illumina HiSeq 2000	PAIRED
SRR5127470	PRJNA319574	human gut metagenome	feces	Netherlands	Europe	‒	‒	WGS	METAGENOMIC	ILLUMINA	Illumina HiSeq 2000	PAIRED
SRR5127472	PRJNA319574	human gut metagenome	feces	Netherlands	Europe	‒	‒	WGS	METAGENOMIC	ILLUMINA	Illumina HiSeq 2000	PAIRED
SRR5127475	PRJNA319574	human gut metagenome	feces	Netherlands	Europe	‒	‒	WGS	METAGENOMIC	ILLUMINA	Illumina HiSeq 2000	PAIRED
SRR5127477	PRJNA319574	human gut metagenome	feces	Netherlands	Europe	‒	‒	WGS	METAGENOMIC	ILLUMINA	Illumina HiSeq 2000	PAIRED
SRR5127480	PRJNA319574	human gut metagenome	feces	Netherlands	Europe	‒	‒	WGS	METAGENOMIC	ILLUMINA	Illumina HiSeq 2000	PAIRED
SRR5127489	PRJNA319574	human gut metagenome	feces	Netherlands	Europe	‒	‒	WGS	METAGENOMIC	ILLUMINA	Illumina HiSeq 2000	PAIRED
SRR5127505	PRJNA319574	human gut metagenome	feces	Netherlands	Europe	‒	‒	WGS	METAGENOMIC	ILLUMINA	Illumina HiSeq 2000	PAIRED
SRR5127507	PRJNA319574	human gut metagenome	feces	Netherlands	Europe	‒	‒	WGS	METAGENOMIC	ILLUMINA	Illumina HiSeq 2000	PAIRED
SRR5127520	PRJNA319574	human gut metagenome	feces	Netherlands	Europe	‒	‒	WGS	METAGENOMIC	ILLUMINA	Illumina HiSeq 2000	PAIRED
SRR5127522	PRJNA319574	human gut metagenome	feces	Netherlands	Europe	‒	‒	WGS	METAGENOMIC	ILLUMINA	Illumina HiSeq 2000	PAIRED
SRR5127527	PRJNA319574	human gut metagenome	feces	Netherlands	Europe	‒	‒	WGS	METAGENOMIC	ILLUMINA	Illumina HiSeq 2000	PAIRED
SRR5127533	PRJNA319574	human gut metagenome	feces	Netherlands	Europe	‒	‒	WGS	METAGENOMIC	ILLUMINA	Illumina HiSeq 2000	PAIRED
SRR5127534	PRJNA319574	human gut metagenome	feces	Netherlands	Europe	‒	‒	WGS	METAGENOMIC	ILLUMINA	Illumina HiSeq 2000	PAIRED
SRR5127535	PRJNA319574	human gut metagenome	feces	Netherlands	Europe	‒	‒	WGS	METAGENOMIC	ILLUMINA	Illumina HiSeq 2000	PAIRED
SRR5127539	PRJNA319574	human gut metagenome	feces	Netherlands	Europe	‒	‒	WGS	METAGENOMIC	ILLUMINA	Illumina HiSeq 2000	PAIRED
SRR5127541	PRJNA319574	human gut metagenome	feces	Netherlands	Europe	‒	‒	WGS	METAGENOMIC	ILLUMINA	Illumina HiSeq 2000	PAIRED
SRR5127542	PRJNA319574	human gut metagenome	feces	Netherlands	Europe	‒	‒	WGS	METAGENOMIC	ILLUMINA	Illumina HiSeq 2000	PAIRED
SRR5127543	PRJNA319574	human gut metagenome	feces	Netherlands	Europe	‒	‒	WGS	METAGENOMIC	ILLUMINA	Illumina HiSeq 2000	PAIRED
SRR5127545	PRJNA319574	human gut metagenome	feces	Netherlands	Europe	‒	‒	WGS	METAGENOMIC	ILLUMINA	Illumina HiSeq 2000	PAIRED
SRR5127546	PRJNA319574	human gut metagenome	feces	Netherlands	Europe	‒	‒	WGS	METAGENOMIC	ILLUMINA	Illumina HiSeq 2000	PAIRED
SRR5127553	PRJNA319574	human gut metagenome	feces	Netherlands	Europe	‒	‒	WGS	METAGENOMIC	ILLUMINA	Illumina HiSeq 2000	PAIRED
SRR5127562	PRJNA319574	human gut metagenome	feces	Netherlands	Europe	‒	‒	WGS	METAGENOMIC	ILLUMINA	Illumina HiSeq 2000	PAIRED
SRR5127566	PRJNA319574	human gut metagenome	feces	Netherlands	Europe	‒	‒	WGS	METAGENOMIC	ILLUMINA	Illumina HiSeq 2000	PAIRED
SRR5127568	PRJNA319574	human gut metagenome	feces	Netherlands	Europe	‒	‒	WGS	METAGENOMIC	ILLUMINA	Illumina HiSeq 2000	PAIRED
SRR5127569	PRJNA319574	human gut metagenome	feces	Netherlands	Europe	‒	‒	WGS	METAGENOMIC	ILLUMINA	Illumina HiSeq 2000	PAIRED
SRR5127579	PRJNA319574	human gut metagenome	feces	Netherlands	Europe	‒	‒	WGS	METAGENOMIC	ILLUMINA	Illumina HiSeq 2000	PAIRED
SRR5127581	PRJNA319574	human gut metagenome	feces	Netherlands	Europe	‒	‒	WGS	METAGENOMIC	ILLUMINA	Illumina HiSeq 2000	PAIRED
SRR5127582	PRJNA319574	human gut metagenome	feces	Netherlands	Europe	‒	‒	WGS	METAGENOMIC	ILLUMINA	Illumina HiSeq 2000	PAIRED
SRR5127583	PRJNA319574	human gut metagenome	feces	Netherlands	Europe	‒	‒	WGS	METAGENOMIC	ILLUMINA	Illumina HiSeq 2000	PAIRED
SRR5127587	PRJNA319574	human gut metagenome	feces	Netherlands	Europe	‒	‒	WGS	METAGENOMIC	ILLUMINA	Illumina HiSeq 2000	PAIRED
SRR5127597	PRJNA319574	human gut metagenome	feces	Netherlands	Europe	‒	‒	WGS	METAGENOMIC	ILLUMINA	Illumina HiSeq 2000	PAIRED
SRR5127598	PRJNA319574	human gut metagenome	feces	Netherlands	Europe	‒	‒	WGS	METAGENOMIC	ILLUMINA	Illumina HiSeq 2000	PAIRED
SRR5127605	PRJNA319574	human gut metagenome	feces	Netherlands	Europe	‒	‒	WGS	METAGENOMIC	ILLUMINA	Illumina HiSeq 2000	PAIRED
SRR5127617	PRJNA319574	human gut metagenome	feces	Netherlands	Europe	‒	‒	WGS	METAGENOMIC	ILLUMINA	Illumina HiSeq 2000	PAIRED
SRR5127619	PRJNA319574	human gut metagenome	feces	Netherlands	Europe	‒	‒	WGS	METAGENOMIC	ILLUMINA	Illumina HiSeq 2000	PAIRED
SRR5127624	PRJNA319574	human gut metagenome	feces	Netherlands	Europe	‒	‒	WGS	METAGENOMIC	ILLUMINA	Illumina HiSeq 2000	PAIRED
SRR5127626	PRJNA319574	human gut metagenome	feces	Netherlands	Europe	‒	‒	WGS	METAGENOMIC	ILLUMINA	Illumina HiSeq 2000	PAIRED
SRR5127627	PRJNA319574	human gut metagenome	feces	Netherlands	Europe	‒	‒	WGS	METAGENOMIC	ILLUMINA	Illumina HiSeq 2000	PAIRED
SRR5127635	PRJNA319574	human gut metagenome	feces	Netherlands	Europe	‒	‒	WGS	METAGENOMIC	ILLUMINA	Illumina HiSeq 2000	PAIRED
SRR5127638	PRJNA319574	human gut metagenome	feces	Netherlands	Europe	‒	‒	WGS	METAGENOMIC	ILLUMINA	Illumina HiSeq 2000	PAIRED
SRR5127640	PRJNA319574	human gut metagenome	feces	Netherlands	Europe	‒	‒	WGS	METAGENOMIC	ILLUMINA	Illumina HiSeq 2000	PAIRED
SRR5127646	PRJNA319574	human gut metagenome	feces	Netherlands	Europe	‒	‒	WGS	METAGENOMIC	ILLUMINA	Illumina HiSeq 2000	PAIRED
SRR5127648	PRJNA319574	human gut metagenome	feces	Netherlands	Europe	‒	‒	WGS	METAGENOMIC	ILLUMINA	Illumina HiSeq 2000	PAIRED
SRR5127656	PRJNA319574	human gut metagenome	feces	Netherlands	Europe	‒	‒	WGS	METAGENOMIC	ILLUMINA	Illumina HiSeq 2000	PAIRED
SRR5127664	PRJNA319574	human gut metagenome	feces	Netherlands	Europe	‒	‒	WGS	METAGENOMIC	ILLUMINA	Illumina HiSeq 2000	PAIRED
SRR5127667	PRJNA319574	human gut metagenome	feces	Netherlands	Europe	‒	‒	WGS	METAGENOMIC	ILLUMINA	Illumina HiSeq 2000	PAIRED
SRR5127668	PRJNA319574	human gut metagenome	feces	Netherlands	Europe	‒	‒	WGS	METAGENOMIC	ILLUMINA	Illumina HiSeq 2000	PAIRED
SRR5127675	PRJNA319574	human gut metagenome	feces	Netherlands	Europe	‒	‒	WGS	METAGENOMIC	ILLUMINA	Illumina HiSeq 2000	PAIRED
SRR5127676	PRJNA319574	human gut metagenome	feces	Netherlands	Europe	‒	‒	WGS	METAGENOMIC	ILLUMINA	Illumina HiSeq 2000	PAIRED
SRR5127678	PRJNA319574	human gut metagenome	feces	Netherlands	Europe	‒	‒	WGS	METAGENOMIC	ILLUMINA	Illumina HiSeq 2000	PAIRED
SRR5127684	PRJNA319574	human gut metagenome	feces	Netherlands	Europe	‒	‒	WGS	METAGENOMIC	ILLUMINA	Illumina HiSeq 2000	PAIRED
SRR5127685	PRJNA319574	human gut metagenome	feces	Netherlands	Europe	‒	‒	WGS	METAGENOMIC	ILLUMINA	Illumina HiSeq 2000	PAIRED
SRR5127687	PRJNA319574	human gut metagenome	feces	Netherlands	Europe	‒	‒	WGS	METAGENOMIC	ILLUMINA	Illumina HiSeq 2000	PAIRED
SRR5127692	PRJNA319574	human gut metagenome	feces	Netherlands	Europe	‒	‒	WGS	METAGENOMIC	ILLUMINA	Illumina HiSeq 2000	PAIRED
SRR5127695	PRJNA319574	human gut metagenome	feces	Netherlands	Europe	‒	‒	WGS	METAGENOMIC	ILLUMINA	Illumina HiSeq 2000	PAIRED
SRR5127719	PRJNA319574	human gut metagenome	feces	Netherlands	Europe	‒	‒	WGS	METAGENOMIC	ILLUMINA	Illumina HiSeq 2000	PAIRED
SRR5127725	PRJNA319574	human gut metagenome	feces	Netherlands	Europe	‒	‒	WGS	METAGENOMIC	ILLUMINA	Illumina HiSeq 2000	PAIRED
SRR5127726	PRJNA319574	human gut metagenome	feces	Netherlands	Europe	‒	‒	WGS	METAGENOMIC	ILLUMINA	Illumina HiSeq 2000	PAIRED
SRR5127728	PRJNA319574	human gut metagenome	feces	Netherlands	Europe	‒	‒	WGS	METAGENOMIC	ILLUMINA	Illumina HiSeq 2000	PAIRED
SRR5127736	PRJNA319574	human gut metagenome	feces	Netherlands	Europe	‒	‒	WGS	METAGENOMIC	ILLUMINA	Illumina HiSeq 2000	PAIRED
SRR5127739	PRJNA319574	human gut metagenome	feces	Netherlands	Europe	‒	‒	WGS	METAGENOMIC	ILLUMINA	Illumina HiSeq 2000	PAIRED
SRR5127740	PRJNA319574	human gut metagenome	feces	Netherlands	Europe	‒	‒	WGS	METAGENOMIC	ILLUMINA	Illumina HiSeq 2000	PAIRED
SRR5127742	PRJNA319574	human gut metagenome	feces	Netherlands	Europe	‒	‒	WGS	METAGENOMIC	ILLUMINA	Illumina HiSeq 2000	PAIRED
SRR5127744	PRJNA319574	human gut metagenome	feces	Netherlands	Europe	‒	‒	WGS	METAGENOMIC	ILLUMINA	Illumina HiSeq 2000	PAIRED
SRR5127751	PRJNA319574	human gut metagenome	feces	Netherlands	Europe	‒	‒	WGS	METAGENOMIC	ILLUMINA	Illumina HiSeq 2000	PAIRED
SRR5127754	PRJNA319574	human gut metagenome	feces	Netherlands	Europe	‒	‒	WGS	METAGENOMIC	ILLUMINA	Illumina HiSeq 2000	PAIRED
SRR5127764	PRJNA319574	human gut metagenome	feces	Netherlands	Europe	‒	‒	WGS	METAGENOMIC	ILLUMINA	Illumina HiSeq 2000	PAIRED
SRR5127766	PRJNA319574	human gut metagenome	feces	Netherlands	Europe	‒	‒	WGS	METAGENOMIC	ILLUMINA	Illumina HiSeq 2000	PAIRED
SRR5127767	PRJNA319574	human gut metagenome	feces	Netherlands	Europe	‒	‒	WGS	METAGENOMIC	ILLUMINA	Illumina HiSeq 2000	PAIRED
SRR5127769	PRJNA319574	human gut metagenome	feces	Netherlands	Europe	‒	‒	WGS	METAGENOMIC	ILLUMINA	Illumina HiSeq 2000	PAIRED
SRR5127779	PRJNA319574	human gut metagenome	feces	Netherlands	Europe	‒	‒	WGS	METAGENOMIC	ILLUMINA	Illumina HiSeq 2000	PAIRED
SRR5127780	PRJNA319574	human gut metagenome	feces	Netherlands	Europe	‒	‒	WGS	METAGENOMIC	ILLUMINA	Illumina HiSeq 2000	PAIRED
SRR5127781	PRJNA319574	human gut metagenome	feces	Netherlands	Europe	‒	‒	WGS	METAGENOMIC	ILLUMINA	Illumina HiSeq 2000	PAIRED
SRR5127783	PRJNA319574	human gut metagenome	feces	Netherlands	Europe	‒	‒	WGS	METAGENOMIC	ILLUMINA	Illumina HiSeq 2000	PAIRED
SRR5127796	PRJNA319574	human gut metagenome	feces	Netherlands	Europe	‒	‒	WGS	METAGENOMIC	ILLUMINA	Illumina HiSeq 2000	PAIRED
SRR5127799	PRJNA319574	human gut metagenome	feces	Netherlands	Europe	‒	‒	WGS	METAGENOMIC	ILLUMINA	Illumina HiSeq 2000	PAIRED
SRR5127814	PRJNA319574	human gut metagenome	feces	Netherlands	Europe	‒	‒	WGS	METAGENOMIC	ILLUMINA	Illumina HiSeq 2000	PAIRED
SRR5127815	PRJNA319574	human gut metagenome	feces	Netherlands	Europe	‒	‒	WGS	METAGENOMIC	ILLUMINA	Illumina HiSeq 2000	PAIRED
SRR5127824	PRJNA319574	human gut metagenome	feces	Netherlands	Europe	‒	‒	WGS	METAGENOMIC	ILLUMINA	Illumina HiSeq 2000	PAIRED
SRR5127825	PRJNA319574	human gut metagenome	feces	Netherlands	Europe	‒	‒	WGS	METAGENOMIC	ILLUMINA	Illumina HiSeq 2000	PAIRED
SRR5127826	PRJNA319574	human gut metagenome	feces	Netherlands	Europe	‒	‒	WGS	METAGENOMIC	ILLUMINA	Illumina HiSeq 2000	PAIRED
SRR5127827	PRJNA319574	human gut metagenome	feces	Netherlands	Europe	‒	‒	WGS	METAGENOMIC	ILLUMINA	Illumina HiSeq 2000	PAIRED
SRR5127835	PRJNA319574	human gut metagenome	feces	Netherlands	Europe	‒	‒	WGS	METAGENOMIC	ILLUMINA	Illumina HiSeq 2000	PAIRED
SRR5127836	PRJNA319574	human gut metagenome	feces	Netherlands	Europe	‒	‒	WGS	METAGENOMIC	ILLUMINA	Illumina HiSeq 2000	PAIRED
SRR5127841	PRJNA319574	human gut metagenome	feces	Netherlands	Europe	‒	‒	WGS	METAGENOMIC	ILLUMINA	Illumina HiSeq 2000	PAIRED
SRR5127843	PRJNA319574	human gut metagenome	feces	Netherlands	Europe	‒	‒	WGS	METAGENOMIC	ILLUMINA	Illumina HiSeq 2000	PAIRED
SRR5127844	PRJNA319574	human gut metagenome	feces	Netherlands	Europe	‒	‒	WGS	METAGENOMIC	ILLUMINA	Illumina HiSeq 2000	PAIRED
SRR5127845	PRJNA319574	human gut metagenome	feces	Netherlands	Europe	‒	‒	WGS	METAGENOMIC	ILLUMINA	Illumina HiSeq 2000	PAIRED
SRR5127849	PRJNA319574	human gut metagenome	feces	Netherlands	Europe	‒	‒	WGS	METAGENOMIC	ILLUMINA	Illumina HiSeq 2000	PAIRED
SRR5127850	PRJNA319574	human gut metagenome	feces	Netherlands	Europe	‒	‒	WGS	METAGENOMIC	ILLUMINA	Illumina HiSeq 2000	PAIRED
SRR5127854	PRJNA319574	human gut metagenome	feces	Netherlands	Europe	‒	‒	WGS	METAGENOMIC	ILLUMINA	Illumina HiSeq 2000	PAIRED
SRR3496377	PRJNA321218	human gut metagenome	feces	‒	‒	‒	‒	WGS	METAGENOMIC	ILLUMINA	Illumina HiSeq 2000	PAIRED
SRR3496378	PRJNA321218	human gut metagenome	feces	‒	‒	‒	‒	WGS	METAGENOMIC	ILLUMINA	Illumina HiSeq 2000	PAIRED
SRR3496379	PRJNA321218	human gut metagenome	feces	‒	‒	‒	‒	WGS	METAGENOMIC	ILLUMINA	Illumina HiSeq 2000	PAIRED
SRR3736984	PRJNA324129	human gut metagenome	feces	USA	North America	38	female	WGS	METAGENOMIC	ILLUMINA	Illumina HiSeq 2500	PAIRED
SRR3736985	PRJNA324129	human gut metagenome	feces	USA	North America	24	male	WGS	METAGENOMIC	ILLUMINA	Illumina HiSeq 2500	PAIRED
SRR3736986	PRJNA324129	human gut metagenome	feces	USA	North America	28	female	WGS	METAGENOMIC	ILLUMINA	Illumina HiSeq 2500	PAIRED
SRR3736987	PRJNA324129	human gut metagenome	feces	USA	North America	27	male	WGS	METAGENOMIC	ILLUMINA	Illumina HiSeq 2500	PAIRED
SRR3736988	PRJNA324129	human gut metagenome	feces	USA	North America	29	male	WGS	METAGENOMIC	ILLUMINA	Illumina HiSeq 2500	PAIRED
SRR3736989	PRJNA324129	human gut metagenome	feces	USA	North America	24	male	WGS	METAGENOMIC	ILLUMINA	Illumina HiSeq 2500	PAIRED
SRR3736990	PRJNA324129	human gut metagenome	feces	USA	North America	27	male	WGS	METAGENOMIC	ILLUMINA	Illumina HiSeq 2500	PAIRED
SRR3736991	PRJNA324129	human gut metagenome	feces	USA	North America	23	female	WGS	METAGENOMIC	ILLUMINA	Illumina HiSeq 2500	PAIRED
SRR3736993	PRJNA324129	human gut metagenome	feces	USA	North America	30	male	WGS	METAGENOMIC	ILLUMINA	Illumina HiSeq 2500	PAIRED
SRR3736994	PRJNA324129	human gut metagenome	feces	USA	North America	22	female	WGS	METAGENOMIC	ILLUMINA	Illumina HiSeq 2500	PAIRED
SRR3736995	PRJNA324129	human gut metagenome	feces	USA	North America	24	female	WGS	METAGENOMIC	ILLUMINA	Illumina HiSeq 2500	PAIRED
SRR3736996	PRJNA324129	human gut metagenome	feces	USA	North America	30	male	WGS	METAGENOMIC	ILLUMINA	Illumina HiSeq 2500	PAIRED
SRR3736997	PRJNA324129	human gut metagenome	feces	USA	North America	27	male	WGS	METAGENOMIC	ILLUMINA	Illumina HiSeq 2500	PAIRED
SRR3736998	PRJNA324129	human gut metagenome	feces	USA	North America	26	female	WGS	METAGENOMIC	ILLUMINA	Illumina HiSeq 2500	PAIRED
SRR3736999	PRJNA324129	human gut metagenome	feces	USA	North America	30	female	WGS	METAGENOMIC	ILLUMINA	Illumina HiSeq 2500	PAIRED
SRR3737009	PRJNA324129	human gut metagenome	feces	USA	North America	25	male	WGS	METAGENOMIC	ILLUMINA	Illumina HiSeq 2500	PAIRED
SRR3737021	PRJNA324129	human gut metagenome	feces	USA	North America	25	female	WGS	METAGENOMIC	ILLUMINA	Illumina HiSeq 2500	PAIRED
SRR3737026	PRJNA324129	human gut metagenome	feces	USA	North America	36	male	WGS	METAGENOMIC	ILLUMINA	Illumina HiSeq 2500	PAIRED
SRR3737028	PRJNA324129	human gut metagenome	feces	USA	North America	31	male	WGS	METAGENOMIC	ILLUMINA	Illumina HiSeq 2500	PAIRED
SRR3737029	PRJNA324129	human gut metagenome	feces	USA	North America	24	female	WGS	METAGENOMIC	ILLUMINA	Illumina HiSeq 2500	PAIRED
SRR3737030	PRJNA324129	human gut metagenome	feces	USA	North America	27	female	WGS	METAGENOMIC	ILLUMINA	Illumina HiSeq 2500	PAIRED
SRR3737031	PRJNA324129	human gut metagenome	feces	USA	North America	24	female	WGS	METAGENOMIC	ILLUMINA	Illumina HiSeq 2500	PAIRED
SRR3724036	PRJNA324672	human gut metagenome	feces	Russia	Europe	28	female	WGS	METAGENOMIC	ILLUMINA	Illumina MiSeq	PAIRED
SRR3724037	PRJNA324672	human gut metagenome	feces	Russia	Europe	34	female	WGS	METAGENOMIC	ILLUMINA	Illumina MiSeq	PAIRED
SRR3724048	PRJNA324672	human gut metagenome	feces	Russia	Europe	‒	female	WGS	METAGENOMIC	ILLUMINA	Illumina MiSeq	PAIRED
SRR3949708	PRJNA331138	human gut metagenome	faeces	Italy	Europe	‒	‒	WGS	METAGENOMIC	ILLUMINA	Illumina MiSeq	PAIRED
SRR3949709	PRJNA331138	human gut metagenome	faeces	Italy	Europe	‒	‒	WGS	METAGENOMIC	ILLUMINA	Illumina MiSeq	PAIRED
SRR3949710	PRJNA331138	human gut metagenome	faeces	Italy	Europe	‒	‒	WGS	METAGENOMIC	ILLUMINA	Illumina MiSeq	PAIRED
SRR3949711	PRJNA331138	human gut metagenome	faeces	Italy	Europe	‒	‒	WGS	METAGENOMIC	ILLUMINA	Illumina MiSeq	PAIRED
SRR3949712	PRJNA331138	human gut metagenome	faeces	Italy	Europe	‒	‒	WGS	METAGENOMIC	ILLUMINA	Illumina MiSeq	PAIRED
SRR3949713	PRJNA331138	human gut metagenome	faeces	Italy	Europe	‒	‒	WGS	METAGENOMIC	ILLUMINA	Illumina MiSeq	PAIRED
SRR3949714	PRJNA331138	human gut metagenome	faeces	Italy	Europe	‒	‒	WGS	METAGENOMIC	ILLUMINA	Illumina MiSeq	PAIRED
SRR3949715	PRJNA331138	human gut metagenome	faeces	Italy	Europe	‒	‒	WGS	METAGENOMIC	ILLUMINA	Illumina MiSeq	PAIRED
SRR3949716	PRJNA331138	human gut metagenome	faeces	Italy	Europe	‒	‒	WGS	METAGENOMIC	ILLUMINA	Illumina MiSeq	PAIRED
SRR3949717	PRJNA331138	human gut metagenome	faeces	Italy	Europe	‒	‒	WGS	METAGENOMIC	ILLUMINA	Illumina MiSeq	PAIRED
SRR4033063	PRJNA339012	human gut metagenome	feces	USA	North America	‒	‒	WGS	METAGENOMIC	ILLUMINA	Illumina HiSeq 2500	PAIRED
SRR4033064	PRJNA339012	human gut metagenome	feces	USA	North America	‒	‒	WGS	METAGENOMIC	ILLUMINA	Illumina HiSeq 2500	PAIRED
SRR4033070	PRJNA339012	human gut metagenome	feces	USA	North America	‒	‒	WGS	METAGENOMIC	ILLUMINA	Illumina HiSeq 2500	PAIRED
SRR4033071	PRJNA339012	human gut metagenome	feces	USA	North America	‒	‒	WGS	METAGENOMIC	ILLUMINA	Illumina HiSeq 2500	PAIRED
SRR4033072	PRJNA339012	human gut metagenome	feces	USA	North America	‒	‒	WGS	METAGENOMIC	ILLUMINA	Illumina HiSeq 2500	PAIRED
SRR4033073	PRJNA339012	human gut metagenome	feces	USA	North America	‒	‒	WGS	METAGENOMIC	ILLUMINA	Illumina HiSeq 2500	PAIRED
SRR4074259	PRJNA340216	human gut metagenome	feces	Italy	Europe	‒	‒	WGS	METAGENOMIC	ILLUMINA	Illumina HiSeq 1500	SINGLE
SRR4074260	PRJNA340216	human gut metagenome	feces	Italy	Europe	‒	‒	WGS	METAGENOMIC	ILLUMINA	Illumina HiSeq 1500	SINGLE
SRR4074261	PRJNA340216	human gut metagenome	feces	Italy	Europe	‒	‒	WGS	METAGENOMIC	ILLUMINA	Illumina HiSeq 1500	SINGLE
SRR4074262	PRJNA340216	human gut metagenome	feces	Italy	Europe	‒	‒	WGS	METAGENOMIC	ILLUMINA	Illumina HiSeq 1500	SINGLE
SRR4074263	PRJNA340216	human gut metagenome	feces	Italy	Europe	‒	‒	WGS	METAGENOMIC	ILLUMINA	Illumina HiSeq 1500	SINGLE
SRR4074264	PRJNA340216	human gut metagenome	feces	Italy	Europe	‒	‒	WGS	METAGENOMIC	ILLUMINA	Illumina HiSeq 1500	SINGLE
SRR4074265	PRJNA340216	human gut metagenome	feces	Italy	Europe	‒	‒	WGS	METAGENOMIC	ILLUMINA	Illumina HiSeq 1500	SINGLE
SRR4074266	PRJNA340216	human gut metagenome	feces	Italy	Europe	‒	‒	WGS	METAGENOMIC	ILLUMINA	Illumina HiSeq 1500	SINGLE
SRR4074267	PRJNA340216	human gut metagenome	feces	Italy	Europe	‒	‒	WGS	METAGENOMIC	ILLUMINA	Illumina HiSeq 1500	SINGLE
SRR4074268	PRJNA340216	human gut metagenome	feces	Italy	Europe	‒	‒	WGS	METAGENOMIC	ILLUMINA	Illumina HiSeq 1500	SINGLE
SRR4074269	PRJNA340216	human gut metagenome	feces	Italy	Europe	‒	‒	WGS	METAGENOMIC	ILLUMINA	Illumina HiSeq 1500	SINGLE
SRR4074278	PRJNA340216	human gut metagenome	feces	Italy	Europe	‒	‒	WGS	METAGENOMIC	ILLUMINA	Illumina HiSeq 1500	SINGLE
SRR4074287	PRJNA340216	human gut metagenome	feces	Italy	Europe	‒	‒	WGS	METAGENOMIC	ILLUMINA	Illumina HiSeq 1500	SINGLE
SRR4074296	PRJNA340216	human gut metagenome	feces	Italy	Europe	‒	‒	WGS	METAGENOMIC	ILLUMINA	Illumina HiSeq 1500	SINGLE
SRR4074305	PRJNA340216	human gut metagenome	feces	Italy	Europe	‒	‒	WGS	METAGENOMIC	ILLUMINA	Illumina HiSeq 1500	SINGLE
SRR4074314	PRJNA340216	human gut metagenome	feces	Italy	Europe	‒	‒	WGS	METAGENOMIC	ILLUMINA	Illumina HiSeq 1500	SINGLE
SRR4074323	PRJNA340216	human gut metagenome	feces	Italy	Europe	‒	‒	WGS	METAGENOMIC	ILLUMINA	Illumina HiSeq 1500	SINGLE
SRR4074332	PRJNA340216	human gut metagenome	feces	Italy	Europe	‒	‒	WGS	METAGENOMIC	ILLUMINA	Illumina HiSeq 1500	SINGLE
SRR4074341	PRJNA340216	human gut metagenome	feces	Italy	Europe	‒	‒	WGS	METAGENOMIC	ILLUMINA	Illumina HiSeq 1500	SINGLE
SRR4074350	PRJNA340216	human gut metagenome	feces	Italy	Europe	‒	‒	WGS	METAGENOMIC	ILLUMINA	Illumina HiSeq 1500	SINGLE
SRR4074351	PRJNA340216	human gut metagenome	feces	Italy	Europe	‒	‒	WGS	METAGENOMIC	ILLUMINA	Illumina HiSeq 1500	SINGLE
SRR4074352	PRJNA340216	human gut metagenome	feces	Italy	Europe	‒	‒	WGS	METAGENOMIC	ILLUMINA	Illumina HiSeq 1500	SINGLE
SRR4074353	PRJNA340216	human gut metagenome	feces	Italy	Europe	‒	‒	WGS	METAGENOMIC	ILLUMINA	Illumina HiSeq 1500	SINGLE
SRR4074354	PRJNA340216	human gut metagenome	feces	Italy	Europe	‒	‒	WGS	METAGENOMIC	ILLUMINA	Illumina HiSeq 1500	SINGLE
SRR4074355	PRJNA340216	human gut metagenome	feces	Italy	Europe	‒	‒	WGS	METAGENOMIC	ILLUMINA	Illumina HiSeq 1500	SINGLE
SRR4074356	PRJNA340216	human gut metagenome	feces	Italy	Europe	‒	‒	WGS	METAGENOMIC	ILLUMINA	Illumina HiSeq 1500	SINGLE
SRR4074357	PRJNA340216	human gut metagenome	feces	Italy	Europe	‒	‒	WGS	METAGENOMIC	ILLUMINA	Illumina HiSeq 1500	SINGLE
SRR5091453	PRJNA356102	human gut metagenome	feces	China	Asia	‒	‒	WGS	METAGENOMIC	ILLUMINA	Illumina HiSeq 2000	PAIRED
SRR5091454	PRJNA356102	human gut metagenome	feces	China	Asia	‒	‒	WGS	METAGENOMIC	ILLUMINA	Illumina HiSeq 2000	PAIRED
SRR5091459	PRJNA356102	human gut metagenome	feces	China	Asia	‒	‒	WGS	METAGENOMIC	ILLUMINA	Illumina HiSeq 2000	PAIRED
SRR5091466	PRJNA356102	human gut metagenome	feces	China	Asia	‒	‒	WGS	METAGENOMIC	ILLUMINA	Illumina HiSeq 2000	PAIRED
SRR5091467	PRJNA356102	human gut metagenome	feces	China	Asia	‒	‒	WGS	METAGENOMIC	ILLUMINA	Illumina HiSeq 2000	PAIRED
SRR5091469	PRJNA356102	human gut metagenome	feces	China	Asia	‒	‒	WGS	METAGENOMIC	ILLUMINA	Illumina HiSeq 2000	PAIRED
SRR5091472	PRJNA356102	human gut metagenome	feces	China	Asia	‒	‒	WGS	METAGENOMIC	ILLUMINA	Illumina HiSeq 2000	PAIRED
SRR5091473	PRJNA356102	human gut metagenome	feces	China	Asia	‒	‒	WGS	METAGENOMIC	ILLUMINA	Illumina HiSeq 2000	PAIRED
SRR5091474	PRJNA356102	human gut metagenome	feces	China	Asia	‒	‒	WGS	METAGENOMIC	ILLUMINA	Illumina HiSeq 2000	PAIRED
SRR5091475	PRJNA356102	human gut metagenome	feces	China	Asia	‒	‒	WGS	METAGENOMIC	ILLUMINA	Illumina HiSeq 2000	PAIRED
SRR5091476	PRJNA356102	human gut metagenome	feces	China	Asia	‒	‒	WGS	METAGENOMIC	ILLUMINA	Illumina HiSeq 2000	PAIRED
SRR5091477	PRJNA356102	human gut metagenome	feces	China	Asia	‒	‒	WGS	METAGENOMIC	ILLUMINA	Illumina HiSeq 2000	PAIRED
SRR5091478	PRJNA356102	human gut metagenome	feces	China	Asia	‒	‒	WGS	METAGENOMIC	ILLUMINA	Illumina HiSeq 2000	PAIRED
SRR5091480	PRJNA356102	human gut metagenome	feces	China	Asia	‒	‒	WGS	METAGENOMIC	ILLUMINA	Illumina HiSeq 2000	PAIRED
SRR5091481	PRJNA356102	human gut metagenome	feces	China	Asia	‒	‒	WGS	METAGENOMIC	ILLUMINA	Illumina HiSeq 2000	PAIRED
SRR5091483	PRJNA356102	human gut metagenome	feces	China	Asia	‒	‒	WGS	METAGENOMIC	ILLUMINA	Illumina HiSeq 2000	PAIRED
SRR5091485	PRJNA356102	human gut metagenome	feces	China	Asia	‒	‒	WGS	METAGENOMIC	ILLUMINA	Illumina HiSeq 2000	PAIRED
SRR5091487	PRJNA356102	human gut metagenome	feces	China	Asia	‒	‒	WGS	METAGENOMIC	ILLUMINA	Illumina HiSeq 2000	PAIRED
SRR5091488	PRJNA356102	human gut metagenome	feces	China	Asia	‒	‒	WGS	METAGENOMIC	ILLUMINA	Illumina HiSeq 2000	PAIRED
SRR5091490	PRJNA356102	human gut metagenome	feces	China	Asia	‒	‒	WGS	METAGENOMIC	ILLUMINA	Illumina HiSeq 2000	PAIRED
SRR5091494	PRJNA356102	human gut metagenome	feces	China	Asia	‒	‒	WGS	METAGENOMIC	ILLUMINA	Illumina HiSeq 2000	PAIRED
SRR5091498	PRJNA356102	human gut metagenome	feces	China	Asia	‒	‒	WGS	METAGENOMIC	ILLUMINA	Illumina HiSeq 2000	PAIRED
SRR5091500	PRJNA356102	human gut metagenome	feces	China	Asia	‒	‒	WGS	METAGENOMIC	ILLUMINA	Illumina HiSeq 2000	PAIRED
SRR5091505	PRJNA356102	human gut metagenome	feces	China	Asia	‒	‒	WGS	METAGENOMIC	ILLUMINA	Illumina HiSeq 2000	PAIRED
SRR5091512	PRJNA356102	human gut metagenome	feces	China	Asia	‒	‒	WGS	METAGENOMIC	ILLUMINA	Illumina HiSeq 2000	PAIRED
SRR5091513	PRJNA356102	human gut metagenome	feces	China	Asia	‒	‒	WGS	METAGENOMIC	ILLUMINA	Illumina HiSeq 2000	PAIRED
SRR5091514	PRJNA356102	human gut metagenome	feces	China	Asia	‒	‒	WGS	METAGENOMIC	ILLUMINA	Illumina HiSeq 2000	PAIRED
SRR5091515	PRJNA356102	human gut metagenome	feces	China	Asia	‒	‒	WGS	METAGENOMIC	ILLUMINA	Illumina HiSeq 2000	PAIRED
SRR5091516	PRJNA356102	human gut metagenome	feces	China	Asia	‒	‒	WGS	METAGENOMIC	ILLUMINA	Illumina HiSeq 2000	PAIRED
SRR5091525	PRJNA356102	human gut metagenome	feces	China	Asia	‒	‒	WGS	METAGENOMIC	ILLUMINA	Illumina HiSeq 2000	PAIRED
SRR5091527	PRJNA356102	human gut metagenome	feces	China	Asia	‒	‒	WGS	METAGENOMIC	ILLUMINA	Illumina HiSeq 2000	PAIRED
SRR5091530	PRJNA356102	human gut metagenome	feces	China	Asia	‒	‒	WGS	METAGENOMIC	ILLUMINA	Illumina HiSeq 2000	PAIRED
SRR5091531	PRJNA356102	human gut metagenome	feces	China	Asia	‒	‒	WGS	METAGENOMIC	ILLUMINA	Illumina HiSeq 2000	PAIRED
SRR5091535	PRJNA356102	human gut metagenome	feces	China	Asia	‒	‒	WGS	METAGENOMIC	ILLUMINA	Illumina HiSeq 2000	PAIRED
SRR5091537	PRJNA356102	human gut metagenome	feces	China	Asia	‒	‒	WGS	METAGENOMIC	ILLUMINA	Illumina HiSeq 2000	PAIRED
SRR5091538	PRJNA356102	human gut metagenome	feces	China	Asia	‒	‒	WGS	METAGENOMIC	ILLUMINA	Illumina HiSeq 2000	PAIRED
SRR5091541	PRJNA356102	human gut metagenome	feces	China	Asia	‒	‒	WGS	METAGENOMIC	ILLUMINA	Illumina HiSeq 2000	PAIRED
SRR5091542	PRJNA356102	human gut metagenome	feces	China	Asia	‒	‒	WGS	METAGENOMIC	ILLUMINA	Illumina HiSeq 2000	PAIRED
SRR5091545	PRJNA356102	human gut metagenome	feces	China	Asia	‒	‒	WGS	METAGENOMIC	ILLUMINA	Illumina HiSeq 2000	PAIRED
SRR5091546	PRJNA356102	human gut metagenome	feces	China	Asia	‒	‒	WGS	METAGENOMIC	ILLUMINA	Illumina HiSeq 2000	PAIRED
SRR5091551	PRJNA356102	human gut metagenome	feces	China	Asia	‒	‒	WGS	METAGENOMIC	ILLUMINA	Illumina HiSeq 2000	PAIRED
SRR5091553	PRJNA356102	human gut metagenome	feces	China	Asia	‒	‒	WGS	METAGENOMIC	ILLUMINA	Illumina HiSeq 2000	PAIRED
SRR5091554	PRJNA356102	human gut metagenome	feces	China	Asia	‒	‒	WGS	METAGENOMIC	ILLUMINA	Illumina HiSeq 2000	PAIRED
SRR5091555	PRJNA356102	human gut metagenome	feces	China	Asia	‒	‒	WGS	METAGENOMIC	ILLUMINA	Illumina HiSeq 2000	PAIRED
SRR5091557	PRJNA356102	human gut metagenome	feces	China	Asia	‒	‒	WGS	METAGENOMIC	ILLUMINA	Illumina HiSeq 2000	PAIRED
SRR5091559	PRJNA356102	human gut metagenome	feces	China	Asia	‒	‒	WGS	METAGENOMIC	ILLUMINA	Illumina HiSeq 2000	PAIRED
SRR5091560	PRJNA356102	human gut metagenome	feces	China	Asia	‒	‒	WGS	METAGENOMIC	ILLUMINA	Illumina HiSeq 2000	PAIRED
SRR5091562	PRJNA356102	human gut metagenome	feces	China	Asia	‒	‒	WGS	METAGENOMIC	ILLUMINA	Illumina HiSeq 2000	PAIRED
SRR5091564	PRJNA356102	human gut metagenome	feces	China	Asia	‒	‒	WGS	METAGENOMIC	ILLUMINA	Illumina HiSeq 2000	PAIRED
SRR5091565	PRJNA356102	human gut metagenome	feces	China	Asia	‒	‒	WGS	METAGENOMIC	ILLUMINA	Illumina HiSeq 2000	PAIRED
SRR5091573	PRJNA356102	human gut metagenome	feces	China	Asia	‒	‒	WGS	METAGENOMIC	ILLUMINA	Illumina HiSeq 2000	PAIRED
SRR5091574	PRJNA356102	human gut metagenome	feces	China	Asia	‒	‒	WGS	METAGENOMIC	ILLUMINA	Illumina HiSeq 2000	PAIRED
SRR5091575	PRJNA356102	human gut metagenome	feces	China	Asia	‒	‒	WGS	METAGENOMIC	ILLUMINA	Illumina HiSeq 2000	PAIRED
SRR5091576	PRJNA356102	human gut metagenome	feces	China	Asia	‒	‒	WGS	METAGENOMIC	ILLUMINA	Illumina HiSeq 2000	PAIRED
SRR5091577	PRJNA356102	human gut metagenome	feces	China	Asia	‒	‒	WGS	METAGENOMIC	ILLUMINA	Illumina HiSeq 2000	PAIRED
SRR5091578	PRJNA356102	human gut metagenome	feces	China	Asia	‒	‒	WGS	METAGENOMIC	ILLUMINA	Illumina HiSeq 2000	PAIRED
SRR5091579	PRJNA356102	human gut metagenome	feces	China	Asia	‒	‒	WGS	METAGENOMIC	ILLUMINA	Illumina HiSeq 2000	PAIRED
SRR5091583	PRJNA356102	human gut metagenome	feces	China	Asia	‒	‒	WGS	METAGENOMIC	ILLUMINA	Illumina HiSeq 2000	PAIRED
SRR5091587	PRJNA356102	human gut metagenome	feces	China	Asia	‒	‒	WGS	METAGENOMIC	ILLUMINA	Illumina HiSeq 2000	PAIRED
SRR5091588	PRJNA356102	human gut metagenome	feces	China	Asia	‒	‒	WGS	METAGENOMIC	ILLUMINA	Illumina HiSeq 2000	PAIRED
SRR5091595	PRJNA356102	human gut metagenome	feces	China	Asia	‒	‒	WGS	METAGENOMIC	ILLUMINA	Illumina HiSeq 2000	PAIRED
SRR5091596	PRJNA356102	human gut metagenome	feces	China	Asia	‒	‒	WGS	METAGENOMIC	ILLUMINA	Illumina HiSeq 2000	PAIRED
SRR5091599	PRJNA356102	human gut metagenome	feces	China	Asia	‒	‒	WGS	METAGENOMIC	ILLUMINA	Illumina HiSeq 2000	PAIRED
SRR5091600	PRJNA356102	human gut metagenome	feces	China	Asia	‒	‒	WGS	METAGENOMIC	ILLUMINA	Illumina HiSeq 2000	PAIRED
SRR5091603	PRJNA356102	human gut metagenome	feces	China	Asia	‒	‒	WGS	METAGENOMIC	ILLUMINA	Illumina HiSeq 2000	PAIRED
SRR5091607	PRJNA356102	human gut metagenome	feces	China	Asia	‒	‒	WGS	METAGENOMIC	ILLUMINA	Illumina HiSeq 2000	PAIRED
SRR5091611	PRJNA356102	human gut metagenome	feces	China	Asia	‒	‒	WGS	METAGENOMIC	ILLUMINA	Illumina HiSeq 2000	PAIRED
SRR5091612	PRJNA356102	human gut metagenome	feces	China	Asia	‒	‒	WGS	METAGENOMIC	ILLUMINA	Illumina HiSeq 2000	PAIRED
SRR5091613	PRJNA356102	human gut metagenome	feces	China	Asia	‒	‒	WGS	METAGENOMIC	ILLUMINA	Illumina HiSeq 2000	PAIRED
SRR5091614	PRJNA356102	human gut metagenome	feces	China	Asia	‒	‒	WGS	METAGENOMIC	ILLUMINA	Illumina HiSeq 2000	PAIRED
SRR5091615	PRJNA356102	human gut metagenome	feces	China	Asia	‒	‒	WGS	METAGENOMIC	ILLUMINA	Illumina HiSeq 2000	PAIRED
SRR5091619	PRJNA356102	human gut metagenome	feces	China	Asia	‒	‒	WGS	METAGENOMIC	ILLUMINA	Illumina HiSeq 2000	PAIRED
SRR5162892	PRJNA360177	human gut metagenome	feces	China	Asia	30	male	WGS	METAGENOMIC	ILLUMINA	Illumina HiSeq 2500	PAIRED
SRR5162895	PRJNA360177	human gut metagenome	feces	China	Asia	35	male	WGS	METAGENOMIC	ILLUMINA	Illumina HiSeq 2500	PAIRED
SRR5239744	PRJNA371647	human gut metagenome	feces	France	Europe	‒	‒	WGS	METAGENOMIC	ILLUMINA	NextSeq 500	PAIRED
SRR5239745	PRJNA371647	human gut metagenome	feces	France	Europe	‒	‒	WGS	METAGENOMIC	ILLUMINA	NextSeq 500	PAIRED
SRR5239746	PRJNA371647	human gut metagenome	feces	France	Europe	‒	‒	WGS	METAGENOMIC	ILLUMINA	NextSeq 500	PAIRED
SRR5239747	PRJNA371647	human gut metagenome	feces	France	Europe	‒	‒	WGS	METAGENOMIC	ILLUMINA	NextSeq 500	PAIRED
SRR5239748	PRJNA371647	human gut metagenome	feces	France	Europe	‒	‒	WGS	METAGENOMIC	ILLUMINA	NextSeq 500	PAIRED
SRR5239749	PRJNA371647	human gut metagenome	feces	France	Europe	‒	‒	WGS	METAGENOMIC	ILLUMINA	NextSeq 500	PAIRED
SRR5239750	PRJNA371647	human gut metagenome	feces	France	Europe	‒	‒	WGS	METAGENOMIC	ILLUMINA	NextSeq 500	PAIRED
SRR5239751	PRJNA371647	human gut metagenome	feces	France	Europe	‒	‒	WGS	METAGENOMIC	ILLUMINA	NextSeq 500	PAIRED
SRR5239752	PRJNA371647	human gut metagenome	feces	France	Europe	‒	‒	WGS	METAGENOMIC	ILLUMINA	NextSeq 500	PAIRED
SRR5963482	PRJNA373879	human gut metagenome	feces	USA	North America	28	Male	WGS	METAGENOMIC	ILLUMINA	Illumina HiSeq 2500	PAIRED
SRR5963483	PRJNA373879	human gut metagenome	feces	USA	North America	34	Male	WGS	METAGENOMIC	ILLUMINA	Illumina HiSeq 2500	PAIRED
SRR5963484	PRJNA373879	human gut metagenome	feces	USA	North America	21	Female	WGS	METAGENOMIC	ILLUMINA	Illumina HiSeq 2500	PAIRED
SRR5963485	PRJNA373879	human gut metagenome	feces	USA	North America	29	Male	WGS	METAGENOMIC	ILLUMINA	Illumina HiSeq 2500	PAIRED
SRR5963486	PRJNA373879	human gut metagenome	feces	USA	North America	29	Female	WGS	METAGENOMIC	ILLUMINA	Illumina HiSeq 2500	PAIRED
SRR5963487	PRJNA373879	human gut metagenome	feces	USA	North America	23	Female	WGS	METAGENOMIC	ILLUMINA	Illumina HiSeq 2500	PAIRED
SRR5963488	PRJNA373879	human gut metagenome	feces	USA	North America	25	Female	WGS	METAGENOMIC	ILLUMINA	Illumina HiSeq 2500	PAIRED
SRR5963489	PRJNA373879	human gut metagenome	feces	USA	North America	36	Female	WGS	METAGENOMIC	ILLUMINA	Illumina HiSeq 2500	PAIRED
SRR5963490	PRJNA373879	human gut metagenome	feces	USA	North America	25	Female	WGS	METAGENOMIC	ILLUMINA	Illumina HiSeq 2500	PAIRED
SRR5963491	PRJNA373879	human gut metagenome	feces	USA	North America	28	Female	WGS	METAGENOMIC	ILLUMINA	Illumina HiSeq 2500	PAIRED
SRR5963492	PRJNA373879	human gut metagenome	feces	USA	North America	25	Male	WGS	METAGENOMIC	ILLUMINA	Illumina HiSeq 2500	PAIRED
SRR5963493	PRJNA373879	human gut metagenome	feces	USA	North America	24	Female	WGS	METAGENOMIC	ILLUMINA	Illumina HiSeq 2500	PAIRED
SRR5963494	PRJNA373879	human gut metagenome	feces	USA	North America	23	Female	WGS	METAGENOMIC	ILLUMINA	Illumina HiSeq 2500	PAIRED
SRR5963495	PRJNA373879	human gut metagenome	feces	USA	North America	25	Female	WGS	METAGENOMIC	ILLUMINA	Illumina HiSeq 2500	PAIRED
SRR5963496	PRJNA373879	human gut metagenome	feces	USA	North America	27	Female	WGS	METAGENOMIC	ILLUMINA	Illumina HiSeq 2500	PAIRED
SRR5963497	PRJNA373879	human gut metagenome	feces	USA	North America	29	Male	WGS	METAGENOMIC	ILLUMINA	Illumina HiSeq 2500	PAIRED
SRR5963498	PRJNA373879	human gut metagenome	feces	USA	North America	24	Male	WGS	METAGENOMIC	ILLUMINA	Illumina HiSeq 2500	PAIRED
SRR5963499	PRJNA373879	human gut metagenome	feces	USA	North America	37	Male	WGS	METAGENOMIC	ILLUMINA	Illumina HiSeq 2500	PAIRED
SRR5963500	PRJNA373879	human gut metagenome	feces	USA	North America	28	Female	WGS	METAGENOMIC	ILLUMINA	Illumina HiSeq 2500	PAIRED
SRR5963501	PRJNA373879	human gut metagenome	feces	USA	North America	23	Male	WGS	METAGENOMIC	ILLUMINA	Illumina HiSeq 2500	PAIRED
SRR6784403	PRJNA379741	human gut metagenome	feces	USA	North America	‒	female	WGS	METAGENOMIC	ILLUMINA	Illumina HiSeq 4000	PAIRED
SRR6784406	PRJNA379741	human gut metagenome	feces	USA	North America	‒	female	WGS	METAGENOMIC	ILLUMINA	Illumina HiSeq 4000	PAIRED
SRR6784408	PRJNA379741	human gut metagenome	feces	USA	North America	‒	female	WGS	METAGENOMIC	ILLUMINA	Illumina HiSeq 4000	PAIRED
SRR6784410	PRJNA379741	human gut metagenome	feces	USA	North America	‒	female	WGS	METAGENOMIC	ILLUMINA	Illumina HiSeq 4000	PAIRED
SRR6784411	PRJNA379741	human gut metagenome	feces	USA	North America	‒	female	WGS	METAGENOMIC	ILLUMINA	Illumina HiSeq 4000	PAIRED
SRR6784414	PRJNA379741	human gut metagenome	feces	USA	North America	‒	female	WGS	METAGENOMIC	ILLUMINA	Illumina HiSeq 4000	PAIRED
SRR6784510	PRJNA379741	human gut metagenome	feces	USA	North America	‒	male	WGS	METAGENOMIC	ILLUMINA	Illumina HiSeq 4000	PAIRED
SRR6784511	PRJNA379741	human gut metagenome	feces	USA	North America	‒	female	WGS	METAGENOMIC	ILLUMINA	Illumina HiSeq 4000	PAIRED
SRR6784512	PRJNA379741	human gut metagenome	feces	USA	North America	‒	male	WGS	METAGENOMIC	ILLUMINA	Illumina HiSeq 4000	PAIRED
SRR6784513	PRJNA379741	human gut metagenome	feces	USA	North America	‒	female	WGS	METAGENOMIC	ILLUMINA	Illumina HiSeq 4000	PAIRED
SRR6784515	PRJNA379741	human gut metagenome	feces	USA	North America	‒	female	WGS	METAGENOMIC	ILLUMINA	Illumina HiSeq 4000	PAIRED
SRR6784516	PRJNA379741	human gut metagenome	feces	USA	North America	‒	male	WGS	METAGENOMIC	ILLUMINA	Illumina HiSeq 4000	PAIRED
SRR6784518	PRJNA379741	human gut metagenome	feces	USA	North America	‒	female	WGS	METAGENOMIC	ILLUMINA	Illumina HiSeq 4000	PAIRED
SRR6784523	PRJNA379741	human gut metagenome	feces	USA	North America	‒	female	WGS	METAGENOMIC	ILLUMINA	Illumina HiSeq 4000	PAIRED
SRR6784524	PRJNA379741	human gut metagenome	feces	USA	North America	‒	female	WGS	METAGENOMIC	ILLUMINA	Illumina HiSeq 4000	PAIRED
SRR6784525	PRJNA379741	human gut metagenome	feces	USA	North America	‒	male	WGS	METAGENOMIC	ILLUMINA	Illumina HiSeq 4000	PAIRED
SRR6784526	PRJNA379741	human gut metagenome	feces	USA	North America	‒	female	WGS	METAGENOMIC	ILLUMINA	Illumina HiSeq 4000	PAIRED
SRR6784528	PRJNA379741	human gut metagenome	feces	USA	North America	‒	female	WGS	METAGENOMIC	ILLUMINA	Illumina HiSeq 4000	PAIRED
SRR6784529	PRJNA379741	human gut metagenome	feces	USA	North America	‒	female	WGS	METAGENOMIC	ILLUMINA	Illumina HiSeq 4000	PAIRED
SRR6784531	PRJNA379741	human gut metagenome	feces	USA	North America	‒	female	WGS	METAGENOMIC	ILLUMINA	Illumina HiSeq 4000	PAIRED
SRR6784534	PRJNA379741	human gut metagenome	feces	USA	North America	‒	female	WGS	METAGENOMIC	ILLUMINA	Illumina HiSeq 4000	PAIRED
SRR6784535	PRJNA379741	human gut metagenome	feces	USA	North America	‒	female	WGS	METAGENOMIC	ILLUMINA	Illumina HiSeq 4000	PAIRED
SRR6784540	PRJNA379741	human gut metagenome	feces	USA	North America	‒	female	WGS	METAGENOMIC	ILLUMINA	Illumina HiSeq 4000	PAIRED
SRR6784541	PRJNA379741	human gut metagenome	feces	USA	North America	‒	female	WGS	METAGENOMIC	ILLUMINA	Illumina HiSeq 4000	PAIRED
SRR6784545	PRJNA379741	human gut metagenome	feces	USA	North America	‒	female	WGS	METAGENOMIC	ILLUMINA	Illumina HiSeq 4000	PAIRED
SRR6784548	PRJNA379741	human gut metagenome	feces	USA	North America	‒	male	WGS	METAGENOMIC	ILLUMINA	Illumina HiSeq 4000	PAIRED
SRR6784551	PRJNA379741	human gut metagenome	feces	USA	North America	‒	female	WGS	METAGENOMIC	ILLUMINA	Illumina HiSeq 4000	PAIRED
SRR6784553	PRJNA379741	human gut metagenome	feces	USA	North America	‒	male	WGS	METAGENOMIC	ILLUMINA	Illumina HiSeq 4000	PAIRED
SRR6784554	PRJNA379741	human gut metagenome	feces	USA	North America	‒	female	WGS	METAGENOMIC	ILLUMINA	Illumina HiSeq 4000	PAIRED
SRR6784556	PRJNA379741	human gut metagenome	feces	USA	North America	‒	female	WGS	METAGENOMIC	ILLUMINA	Illumina HiSeq 4000	PAIRED
SRR6784558	PRJNA379741	human gut metagenome	feces	USA	North America	‒	female	WGS	METAGENOMIC	ILLUMINA	Illumina HiSeq 4000	PAIRED
SRR6784559	PRJNA379741	human gut metagenome	feces	USA	North America	‒	male	WGS	METAGENOMIC	ILLUMINA	Illumina HiSeq 4000	PAIRED
SRR6784560	PRJNA379741	human gut metagenome	feces	USA	North America	‒	female	WGS	METAGENOMIC	ILLUMINA	Illumina HiSeq 4000	PAIRED
SRR6784564	PRJNA379741	human gut metagenome	feces	USA	North America	‒	female	WGS	METAGENOMIC	ILLUMINA	Illumina HiSeq 4000	PAIRED
SRR6784566	PRJNA379741	human gut metagenome	feces	USA	North America	‒	female	WGS	METAGENOMIC	ILLUMINA	Illumina HiSeq 4000	PAIRED
SRR6784567	PRJNA379741	human gut metagenome	feces	USA	North America	‒	female	WGS	METAGENOMIC	ILLUMINA	Illumina HiSeq 4000	PAIRED
SRR6784569	PRJNA379741	human gut metagenome	feces	USA	North America	‒	female	WGS	METAGENOMIC	ILLUMINA	Illumina HiSeq 4000	PAIRED
SRR6784570	PRJNA379741	human gut metagenome	feces	USA	North America	‒	female	WGS	METAGENOMIC	ILLUMINA	Illumina HiSeq 4000	PAIRED
SRR6784571	PRJNA379741	human gut metagenome	feces	USA	North America	‒	female	WGS	METAGENOMIC	ILLUMINA	Illumina HiSeq 4000	PAIRED
SRR6784574	PRJNA379741	human gut metagenome	feces	USA	North America	‒	female	WGS	METAGENOMIC	ILLUMINA	Illumina HiSeq 4000	PAIRED
SRR6784576	PRJNA379741	human gut metagenome	feces	USA	North America	‒	female	WGS	METAGENOMIC	ILLUMINA	Illumina HiSeq 4000	PAIRED
SRR6784578	PRJNA379741	human gut metagenome	feces	USA	North America	‒	female	WGS	METAGENOMIC	ILLUMINA	Illumina HiSeq 4000	PAIRED
SRR6784579	PRJNA379741	human gut metagenome	feces	USA	North America	‒	female	WGS	METAGENOMIC	ILLUMINA	Illumina HiSeq 4000	PAIRED
SRR6784583	PRJNA379741	human gut metagenome	feces	USA	North America	‒	female	WGS	METAGENOMIC	ILLUMINA	Illumina HiSeq 4000	PAIRED
SRR6784585	PRJNA379741	human gut metagenome	feces	USA	North America	‒	female	WGS	METAGENOMIC	ILLUMINA	Illumina HiSeq 4000	PAIRED
SRR6784586	PRJNA379741	human gut metagenome	feces	USA	North America	‒	male	WGS	METAGENOMIC	ILLUMINA	Illumina HiSeq 4000	PAIRED
SRR6784587	PRJNA379741	human gut metagenome	feces	USA	North America	‒	male	WGS	METAGENOMIC	ILLUMINA	Illumina HiSeq 4000	PAIRED
SRR6784590	PRJNA379741	human gut metagenome	feces	USA	North America	‒	female	WGS	METAGENOMIC	ILLUMINA	Illumina HiSeq 4000	PAIRED
SRR6784591	PRJNA379741	human gut metagenome	feces	USA	North America	‒	female	WGS	METAGENOMIC	ILLUMINA	Illumina HiSeq 4000	PAIRED
SRR6784594	PRJNA379741	human gut metagenome	feces	USA	North America	‒	female	WGS	METAGENOMIC	ILLUMINA	Illumina HiSeq 4000	PAIRED
SRR6155411	PRJNA382011	human gut metagenome	feces	Mexico	North America	‒	‒	WGS	METAGENOMIC	ILLUMINA	NextSeq 500	PAIRED
SRR6155412	PRJNA382011	human gut metagenome	feces	Mexico	North America	‒	‒	WGS	METAGENOMIC	ILLUMINA	NextSeq 500	PAIRED
SRR6155413	PRJNA382011	human gut metagenome	feces	Mexico	North America	‒	‒	WGS	METAGENOMIC	ILLUMINA	NextSeq 500	PAIRED
SRR6155414	PRJNA382011	human gut metagenome	feces	Mexico	North America	‒	‒	WGS	METAGENOMIC	ILLUMINA	NextSeq 500	PAIRED
SRR6155415	PRJNA382011	human gut metagenome	feces	Mexico	North America	‒	‒	WGS	METAGENOMIC	ILLUMINA	NextSeq 500	PAIRED
SRR6155416	PRJNA382011	human gut metagenome	feces	Mexico	North America	‒	‒	WGS	METAGENOMIC	ILLUMINA	NextSeq 500	PAIRED
SRR6155417	PRJNA382011	human gut metagenome	feces	Mexico	North America	‒	‒	WGS	METAGENOMIC	ILLUMINA	NextSeq 500	PAIRED
SRR5723798	PRJNA384716	human gut metagenome	feces	Finland	Europe	‒	‒	WGS	METAGENOMIC	ILLUMINA	NextSeq 500	PAIRED
SRR5723799	PRJNA384716	human gut metagenome	feces	Finland	Europe	‒	‒	WGS	METAGENOMIC	ILLUMINA	NextSeq 500	PAIRED
SRR5723800	PRJNA384716	human gut metagenome	feces	Finland	Europe	‒	‒	WGS	METAGENOMIC	ILLUMINA	NextSeq 500	PAIRED
SRR5723801	PRJNA384716	human gut metagenome	feces	Finland	Europe	‒	‒	WGS	METAGENOMIC	ILLUMINA	NextSeq 500	PAIRED
SRR5723810	PRJNA384716	human gut metagenome	feces	Finland	Europe	‒	‒	WGS	METAGENOMIC	ILLUMINA	NextSeq 500	PAIRED
SRR5723811	PRJNA384716	human gut metagenome	feces	Finland	Europe	‒	‒	WGS	METAGENOMIC	ILLUMINA	NextSeq 500	PAIRED
SRR5723812	PRJNA384716	human gut metagenome	feces	Finland	Europe	‒	‒	WGS	METAGENOMIC	ILLUMINA	NextSeq 500	PAIRED
SRR5723813	PRJNA384716	human gut metagenome	feces	Finland	Europe	‒	‒	WGS	METAGENOMIC	ILLUMINA	NextSeq 500	PAIRED
SRR5723817	PRJNA384716	human gut metagenome	feces	Finland	Europe	‒	‒	WGS	METAGENOMIC	ILLUMINA	NextSeq 500	PAIRED
SRR5723818	PRJNA384716	human gut metagenome	feces	Finland	Europe	‒	‒	WGS	METAGENOMIC	ILLUMINA	NextSeq 500	PAIRED
SRR5723819	PRJNA384716	human gut metagenome	feces	Finland	Europe	‒	‒	WGS	METAGENOMIC	ILLUMINA	NextSeq 500	PAIRED
SRR5723826	PRJNA384716	human gut metagenome	feces	Finland	Europe	‒	‒	WGS	METAGENOMIC	ILLUMINA	NextSeq 500	PAIRED
SRR5723827	PRJNA384716	human gut metagenome	feces	Finland	Europe	‒	‒	WGS	METAGENOMIC	ILLUMINA	NextSeq 500	PAIRED
SRR5723832	PRJNA384716	human gut metagenome	feces	Finland	Europe	‒	‒	WGS	METAGENOMIC	ILLUMINA	NextSeq 500	PAIRED
SRR5723833	PRJNA384716	human gut metagenome	feces	Finland	Europe	‒	‒	WGS	METAGENOMIC	ILLUMINA	NextSeq 500	PAIRED
SRR5723836	PRJNA384716	human gut metagenome	feces	Finland	Europe	‒	‒	WGS	METAGENOMIC	ILLUMINA	NextSeq 500	PAIRED
SRR5723837	PRJNA384716	human gut metagenome	feces	Finland	Europe	‒	‒	WGS	METAGENOMIC	ILLUMINA	NextSeq 500	PAIRED
SRR5723842	PRJNA384716	human gut metagenome	feces	Finland	Europe	‒	‒	WGS	METAGENOMIC	ILLUMINA	NextSeq 500	PAIRED
SRR5723843	PRJNA384716	human gut metagenome	feces	Finland	Europe	‒	‒	WGS	METAGENOMIC	ILLUMINA	NextSeq 500	PAIRED
SRR5723848	PRJNA384716	human gut metagenome	feces	Finland	Europe	‒	‒	WGS	METAGENOMIC	ILLUMINA	NextSeq 500	PAIRED
SRR5723849	PRJNA384716	human gut metagenome	feces	Finland	Europe	‒	‒	WGS	METAGENOMIC	ILLUMINA	NextSeq 500	PAIRED
SRR5723858	PRJNA384716	human gut metagenome	feces	Finland	Europe	‒	‒	WGS	METAGENOMIC	ILLUMINA	NextSeq 500	PAIRED
SRR5723859	PRJNA384716	human gut metagenome	feces	Finland	Europe	‒	‒	WGS	METAGENOMIC	ILLUMINA	NextSeq 500	PAIRED
SRR5723864	PRJNA384716	human gut metagenome	feces	Finland	Europe	‒	‒	WGS	METAGENOMIC	ILLUMINA	NextSeq 500	PAIRED
SRR5723865	PRJNA384716	human gut metagenome	feces	Finland	Europe	‒	‒	WGS	METAGENOMIC	ILLUMINA	NextSeq 500	PAIRED
SRR5723870	PRJNA384716	human gut metagenome	feces	Finland	Europe	‒	‒	WGS	METAGENOMIC	ILLUMINA	NextSeq 500	PAIRED
SRR5723871	PRJNA384716	human gut metagenome	feces	Finland	Europe	‒	‒	WGS	METAGENOMIC	ILLUMINA	NextSeq 500	PAIRED
SRR5723872	PRJNA384716	human gut metagenome	feces	Finland	Europe	‒	‒	WGS	METAGENOMIC	ILLUMINA	NextSeq 500	PAIRED
SRR5723873	PRJNA384716	human gut metagenome	feces	Finland	Europe	‒	‒	WGS	METAGENOMIC	ILLUMINA	NextSeq 500	PAIRED
SRR5723886	PRJNA384716	human gut metagenome	feces	Finland	Europe	‒	‒	WGS	METAGENOMIC	ILLUMINA	NextSeq 500	PAIRED
SRR5723887	PRJNA384716	human gut metagenome	feces	Finland	Europe	‒	‒	WGS	METAGENOMIC	ILLUMINA	NextSeq 500	PAIRED
SRR5723890	PRJNA384716	human gut metagenome	feces	Finland	Europe	‒	‒	WGS	METAGENOMIC	ILLUMINA	NextSeq 500	PAIRED
SRR5723891	PRJNA384716	human gut metagenome	feces	Finland	Europe	‒	‒	WGS	METAGENOMIC	ILLUMINA	NextSeq 500	PAIRED
SRR5665043	PRJNA389927	human gut metagenome	feces	Canada	North America	‒	‒	WGS	METAGENOMIC	ILLUMINA	Illumina HiSeq 4000	PAIRED
SRR5665045	PRJNA389927	human gut metagenome	feces	USA	North America	‒	‒	WGS	METAGENOMIC	ILLUMINA	Illumina HiSeq 4000	PAIRED
SRR5665046	PRJNA389927	human gut metagenome	feces	Canada	North America	‒	‒	WGS	METAGENOMIC	ILLUMINA	Illumina HiSeq 4000	PAIRED
SRR5665047	PRJNA389927	human gut metagenome	feces	USA	North America	‒	‒	WGS	METAGENOMIC	ILLUMINA	Illumina HiSeq 4000	PAIRED
SRR5665048	PRJNA389927	human gut metagenome	feces	USA	North America	‒	‒	WGS	METAGENOMIC	ILLUMINA	Illumina HiSeq 4000	PAIRED
SRR5665049	PRJNA389927	human gut metagenome	feces	USA	North America	‒	‒	WGS	METAGENOMIC	ILLUMINA	Illumina HiSeq 4000	PAIRED
SRR5665050	PRJNA389927	human gut metagenome	feces	USA	North America	‒	‒	WGS	METAGENOMIC	ILLUMINA	Illumina HiSeq 4000	PAIRED
SRR5665122	PRJNA389927	human gut metagenome	feces	USA	North America	‒	‒	WGS	METAGENOMIC	ILLUMINA	Illumina HiSeq 4000	PAIRED
SRR5665155	PRJNA389927	human gut metagenome	feces	USA	North America	‒	‒	WGS	METAGENOMIC	ILLUMINA	Illumina HiSeq 4000	PAIRED
SRR5665156	PRJNA389927	human gut metagenome	feces	USA	North America	‒	‒	WGS	METAGENOMIC	ILLUMINA	Illumina HiSeq 4000	PAIRED
SRR5665157	PRJNA389927	human gut metagenome	feces	Canada	North America	‒	‒	WGS	METAGENOMIC	ILLUMINA	Illumina HiSeq 4000	PAIRED
SRR5665158	PRJNA389927	human gut metagenome	feces	USA	North America	‒	‒	WGS	METAGENOMIC	ILLUMINA	Illumina HiSeq 4000	PAIRED
SRR5665159	PRJNA389927	human gut metagenome	feces	USA	North America	‒	‒	WGS	METAGENOMIC	ILLUMINA	Illumina HiSeq 4000	PAIRED
SRR5665160	PRJNA389927	human gut metagenome	feces	USA	North America	‒	‒	WGS	METAGENOMIC	ILLUMINA	Illumina HiSeq 4000	PAIRED
SRR5665161	PRJNA389927	human gut metagenome	feces	USA	North America	‒	‒	WGS	METAGENOMIC	ILLUMINA	Illumina HiSeq 4000	PAIRED
SRR5665162	PRJNA389927	human gut metagenome	feces	USA	North America	‒	‒	WGS	METAGENOMIC	ILLUMINA	Illumina HiSeq 4000	PAIRED
SRR5665163	PRJNA389927	human gut metagenome	feces	USA	North America	‒	‒	WGS	METAGENOMIC	ILLUMINA	Illumina HiSeq 4000	PAIRED
SRR5665164	PRJNA389927	human gut metagenome	feces	USA	North America	‒	‒	WGS	METAGENOMIC	ILLUMINA	Illumina HiSeq 4000	PAIRED
SRR5665178	PRJNA389927	human gut metagenome	feces	USA	North America	‒	‒	WGS	METAGENOMIC	ILLUMINA	Illumina HiSeq 4000	PAIRED
SRR5665179	PRJNA389927	human gut metagenome	feces	USA	North America	‒	‒	WGS	METAGENOMIC	ILLUMINA	Illumina HiSeq 4000	PAIRED
SRR5665180	PRJNA389927	human gut metagenome	feces	USA	North America	‒	‒	WGS	METAGENOMIC	ILLUMINA	Illumina HiSeq 4000	PAIRED
SRR5665181	PRJNA389927	human gut metagenome	feces	USA	North America	‒	‒	WGS	METAGENOMIC	ILLUMINA	Illumina HiSeq 4000	PAIRED
SRR5665182	PRJNA389927	human gut metagenome	feces	USA	North America	‒	‒	WGS	METAGENOMIC	ILLUMINA	Illumina HiSeq 4000	PAIRED
SRR5665183	PRJNA389927	human gut metagenome	feces	USA	North America	‒	‒	WGS	METAGENOMIC	ILLUMINA	Illumina HiSeq 4000	PAIRED
SRR5665184	PRJNA389927	human gut metagenome	feces	USA	North America	‒	‒	WGS	METAGENOMIC	ILLUMINA	Illumina HiSeq 4000	PAIRED
SRR5665185	PRJNA389927	human gut metagenome	feces	USA	North America	‒	‒	WGS	METAGENOMIC	ILLUMINA	Illumina HiSeq 4000	PAIRED
SRR5665186	PRJNA389927	human gut metagenome	feces	USA	North America	‒	‒	WGS	METAGENOMIC	ILLUMINA	Illumina HiSeq 4000	PAIRED
SRR5665187	PRJNA389927	human gut metagenome	feces	USA	North America	‒	‒	WGS	METAGENOMIC	ILLUMINA	Illumina HiSeq 4000	PAIRED
SRR5903331	PRJNA397219	human gut metagenome	faeces	USA	North America	64	male	WGS	METAGENOMIC	ILLUMINA	Illumina HiSeq 2500	PAIRED
SRR5903333	PRJNA397219	human gut metagenome	faeces	USA	North America	59	male	WGS	METAGENOMIC	ILLUMINA	Illumina HiSeq 2500	PAIRED
SRR5903335	PRJNA397219	human gut metagenome	faeces	USA	North America	74	female	WGS	METAGENOMIC	ILLUMINA	Illumina HiSeq 2500	PAIRED
SRR5903344	PRJNA397219	human gut metagenome	faeces	USA	North America	61	male	WGS	METAGENOMIC	ILLUMINA	Illumina HiSeq 2500	PAIRED
SRR5903348	PRJNA397219	human gut metagenome	faeces	USA	North America	51	female	WGS	METAGENOMIC	ILLUMINA	Illumina HiSeq 2500	PAIRED
SRR5903349	PRJNA397219	human gut metagenome	faeces	USA	North America	78	male	WGS	METAGENOMIC	ILLUMINA	Illumina HiSeq 2500	PAIRED
SRR5903355	PRJNA397219	human gut metagenome	faeces	USA	North America	59	male	WGS	METAGENOMIC	ILLUMINA	Illumina HiSeq 2500	PAIRED
SRR5903356	PRJNA397219	human gut metagenome	faeces	USA	North America	60	male	WGS	METAGENOMIC	ILLUMINA	Illumina HiSeq 2500	PAIRED
SRR5903359	PRJNA397219	human gut metagenome	faeces	USA	North America	51	female	WGS	METAGENOMIC	ILLUMINA	Illumina HiSeq 2500	PAIRED
SRR5903360	PRJNA397219	human gut metagenome	faeces	USA	North America	78	male	WGS	METAGENOMIC	ILLUMINA	Illumina HiSeq 2500	PAIRED
SRR5903364	PRJNA397219	human gut metagenome	faeces	USA	North America	78	female	WGS	METAGENOMIC	ILLUMINA	Illumina HiSeq 2500	PAIRED
SRR5903370	PRJNA397219	human gut metagenome	faeces	USA	North America	64	male	WGS	METAGENOMIC	ILLUMINA	Illumina HiSeq 2500	PAIRED
SRR5903372	PRJNA397219	human gut metagenome	faeces	USA	North America	78	male	WGS	METAGENOMIC	ILLUMINA	Illumina HiSeq 2500	PAIRED
SRR5903321	PRJNA397219	human gut metagenome	faeces	USA	North America	76	female	WGS	METAGENOMIC	ILLUMINA	Illumina HiSeq 2500	PAIRED
SRR5903322	PRJNA397219	human gut metagenome	faeces	USA	North America	55	male	WGS	METAGENOMIC	ILLUMINA	Illumina HiSeq 2500	PAIRED
SRR5903332	PRJNA397219	human gut metagenome	faeces	USA	North America	60	male	WGS	METAGENOMIC	ILLUMINA	Illumina HiSeq 2500	PAIRED
SRR5903334	PRJNA397219	human gut metagenome	faeces	USA	North America	78	female	WGS	METAGENOMIC	ILLUMINA	Illumina HiSeq 2500	PAIRED
SRR5903340	PRJNA397219	human gut metagenome	faeces	USA	North America	76	female	WGS	METAGENOMIC	ILLUMINA	Illumina HiSeq 2500	PAIRED
SRR5903341	PRJNA397219	human gut metagenome	faeces	USA	North America	55	male	WGS	METAGENOMIC	ILLUMINA	Illumina HiSeq 2500	PAIRED
SRR5903343	PRJNA397219	human gut metagenome	faeces	USA	North America	74	female	WGS	METAGENOMIC	ILLUMINA	Illumina HiSeq 2500	PAIRED
SRR5903347	PRJNA397219	human gut metagenome	faeces	USA	North America	75	female	WGS	METAGENOMIC	ILLUMINA	Illumina HiSeq 2500	PAIRED
SRR5903350	PRJNA397219	human gut metagenome	faeces	USA	North America	76	female	WGS	METAGENOMIC	ILLUMINA	Illumina HiSeq 2500	PAIRED
SRR5903351	PRJNA397219	human gut metagenome	faeces	USA	North America	55	male	WGS	METAGENOMIC	ILLUMINA	Illumina HiSeq 2500	PAIRED
SRR5903352	PRJNA397219	human gut metagenome	faeces	USA	North America	78	female	WGS	METAGENOMIC	ILLUMINA	Illumina HiSeq 2500	PAIRED
SRR5903353	PRJNA397219	human gut metagenome	faeces	USA	North America	61	male	WGS	METAGENOMIC	ILLUMINA	Illumina HiSeq 2500	PAIRED
SRR5903354	PRJNA397219	human gut metagenome	faeces	USA	North America	75	female	WGS	METAGENOMIC	ILLUMINA	Illumina HiSeq 2500	PAIRED
SRR5903358	PRJNA397219	human gut metagenome	faeces	USA	North America	64	male	WGS	METAGENOMIC	ILLUMINA	Illumina HiSeq 2500	PAIRED
SRR5903361	PRJNA397219	human gut metagenome	faeces	USA	North America	59	male	WGS	METAGENOMIC	ILLUMINA	Illumina HiSeq 2500	PAIRED
SRR5903362	PRJNA397219	human gut metagenome	faeces	USA	North America	60	male	WGS	METAGENOMIC	ILLUMINA	Illumina HiSeq 2500	PAIRED
SRR5903363	PRJNA397219	human gut metagenome	faeces	USA	North America	74	female	WGS	METAGENOMIC	ILLUMINA	Illumina HiSeq 2500	PAIRED
SRR5903371	PRJNA397219	human gut metagenome	faeces	USA	North America	51	female	WGS	METAGENOMIC	ILLUMINA	Illumina HiSeq 2500	PAIRED
SRR5903373	PRJNA397219	human gut metagenome	faeces	USA	North America	61	male	WGS	METAGENOMIC	ILLUMINA	Illumina HiSeq 2500	PAIRED
SRR5903374	PRJNA397219	human gut metagenome	faeces	USA	North America	75	female	WGS	METAGENOMIC	ILLUMINA	Illumina HiSeq 2500	PAIRED
SRR6122126	PRJNA412411	human gut metagenome	feces	Germany	Europe	‒	‒	WGS	METAGENOMIC	ILLUMINA	Illumina HiSeq 2500	PAIRED
SRR6122127	PRJNA412411	human gut metagenome	feces	Germany	Europe	‒	‒	WGS	METAGENOMIC	ILLUMINA	Illumina HiSeq 2500	PAIRED
SRR6122133	PRJNA412411	human gut metagenome	feces	Germany	Europe	‒	‒	WGS	METAGENOMIC	ILLUMINA	Illumina HiSeq 2500	PAIRED
SRR6122138	PRJNA412411	human gut metagenome	feces	Germany	Europe	‒	‒	WGS	METAGENOMIC	ILLUMINA	Illumina HiSeq 2500	PAIRED
SRR6122139	PRJNA412411	human gut metagenome	feces	Germany	Europe	‒	‒	WGS	METAGENOMIC	ILLUMINA	Illumina HiSeq 2500	PAIRED
SRR6122151	PRJNA412411	human gut metagenome	feces	Germany	Europe	‒	‒	WGS	METAGENOMIC	ILLUMINA	Illumina HiSeq 2500	PAIRED
SRR6122152	PRJNA412411	human gut metagenome	feces	Germany	Europe	‒	‒	WGS	METAGENOMIC	ILLUMINA	Illumina HiSeq 2500	PAIRED
SRR6122153	PRJNA412411	human gut metagenome	feces	Germany	Europe	‒	‒	WGS	METAGENOMIC	ILLUMINA	Illumina HiSeq 2500	PAIRED
SRR6122158	PRJNA412411	human gut metagenome	feces	Germany	Europe	‒	‒	WGS	METAGENOMIC	ILLUMINA	Illumina HiSeq 2500	PAIRED
SRR6122159	PRJNA412411	human gut metagenome	feces	Germany	Europe	‒	‒	WGS	METAGENOMIC	ILLUMINA	Illumina HiSeq 2500	PAIRED
SRR6122161	PRJNA412411	human gut metagenome	feces	Germany	Europe	‒	‒	WGS	METAGENOMIC	ILLUMINA	Illumina HiSeq 2500	PAIRED
SRR6122164	PRJNA412411	human gut metagenome	feces	Germany	Europe	‒	‒	WGS	METAGENOMIC	ILLUMINA	Illumina HiSeq 2500	PAIRED
SRR6122165	PRJNA412411	human gut metagenome	feces	Germany	Europe	‒	‒	WGS	METAGENOMIC	ILLUMINA	Illumina HiSeq 2500	PAIRED
SRR6122166	PRJNA412411	human gut metagenome	feces	Germany	Europe	‒	‒	WGS	METAGENOMIC	ILLUMINA	Illumina HiSeq 2500	PAIRED
SRR6122181	PRJNA412411	human gut metagenome	feces	Germany	Europe	‒	‒	WGS	METAGENOMIC	ILLUMINA	Illumina HiSeq 2500	PAIRED
SRR6122190	PRJNA412411	human gut metagenome	feces	Germany	Europe	‒	‒	WGS	METAGENOMIC	ILLUMINA	Illumina HiSeq 2500	PAIRED
SRR6122191	PRJNA412411	human gut metagenome	feces	Germany	Europe	‒	‒	WGS	METAGENOMIC	ILLUMINA	Illumina HiSeq 2500	PAIRED
SRR6122192	PRJNA412411	human gut metagenome	feces	Germany	Europe	‒	‒	WGS	METAGENOMIC	ILLUMINA	Illumina HiSeq 2500	PAIRED
SRR6122198	PRJNA412411	human gut metagenome	feces	Germany	Europe	‒	‒	WGS	METAGENOMIC	ILLUMINA	Illumina HiSeq 2500	PAIRED
SRR6122199	PRJNA412411	human gut metagenome	feces	Germany	Europe	‒	‒	WGS	METAGENOMIC	ILLUMINA	Illumina HiSeq 2500	PAIRED
SRR6122201	PRJNA412411	human gut metagenome	feces	Germany	Europe	‒	‒	WGS	METAGENOMIC	ILLUMINA	Illumina HiSeq 2500	PAIRED
SRR6122216	PRJNA412411	human gut metagenome	feces	Germany	Europe	‒	‒	WGS	METAGENOMIC	ILLUMINA	Illumina HiSeq 2500	PAIRED
SRR6122217	PRJNA412411	human gut metagenome	feces	Germany	Europe	‒	‒	WGS	METAGENOMIC	ILLUMINA	Illumina HiSeq 2500	PAIRED
SRR6122218	PRJNA412411	human gut metagenome	feces	Germany	Europe	‒	‒	WGS	METAGENOMIC	ILLUMINA	Illumina HiSeq 2500	PAIRED
SRR6122219	PRJNA412411	human gut metagenome	feces	Germany	Europe	‒	‒	WGS	METAGENOMIC	ILLUMINA	Illumina HiSeq 2500	PAIRED
SRR6122220	PRJNA412411	human gut metagenome	feces	Germany	Europe	‒	‒	WGS	METAGENOMIC	ILLUMINA	Illumina HiSeq 2500	PAIRED
SRR6122221	PRJNA412411	human gut metagenome	feces	Germany	Europe	‒	‒	WGS	METAGENOMIC	ILLUMINA	Illumina HiSeq 2500	PAIRED
SRR6122222	PRJNA412411	human gut metagenome	feces	Germany	Europe	‒	‒	WGS	METAGENOMIC	ILLUMINA	Illumina HiSeq 2500	PAIRED
SRR6122223	PRJNA412411	human gut metagenome	feces	Germany	Europe	‒	‒	WGS	METAGENOMIC	ILLUMINA	Illumina HiSeq 2500	PAIRED
SRR6122238	PRJNA412411	human gut metagenome	feces	Germany	Europe	‒	‒	WGS	METAGENOMIC	ILLUMINA	Illumina HiSeq 2500	PAIRED
SRR6122240	PRJNA412411	human gut metagenome	feces	Germany	Europe	‒	‒	WGS	METAGENOMIC	ILLUMINA	Illumina HiSeq 2500	PAIRED
SRR6122241	PRJNA412411	human gut metagenome	feces	Germany	Europe	‒	‒	WGS	METAGENOMIC	ILLUMINA	Illumina HiSeq 2500	PAIRED
SRR6122242	PRJNA412411	human gut metagenome	feces	Germany	Europe	‒	‒	WGS	METAGENOMIC	ILLUMINA	Illumina HiSeq 2500	PAIRED
SRR6122243	PRJNA412411	human gut metagenome	feces	Germany	Europe	‒	‒	WGS	METAGENOMIC	ILLUMINA	Illumina HiSeq 2500	PAIRED
SRR6122244	PRJNA412411	human gut metagenome	feces	Germany	Europe	‒	‒	WGS	METAGENOMIC	ILLUMINA	Illumina HiSeq 2500	PAIRED
SRR6122245	PRJNA412411	human gut metagenome	feces	Germany	Europe	‒	‒	WGS	METAGENOMIC	ILLUMINA	Illumina HiSeq 2500	PAIRED
SRR6122246	PRJNA412411	human gut metagenome	feces	Germany	Europe	‒	‒	WGS	METAGENOMIC	ILLUMINA	Illumina HiSeq 2500	PAIRED
SRR6122247	PRJNA412411	human gut metagenome	feces	Germany	Europe	‒	‒	WGS	METAGENOMIC	ILLUMINA	Illumina HiSeq 2500	PAIRED
SRR6122251	PRJNA412411	human gut metagenome	feces	Germany	Europe	‒	‒	WGS	METAGENOMIC	ILLUMINA	Illumina HiSeq 2500	PAIRED
SRR6122252	PRJNA412411	human gut metagenome	feces	Germany	Europe	‒	‒	WGS	METAGENOMIC	ILLUMINA	Illumina HiSeq 2500	PAIRED
SRR6122253	PRJNA412411	human gut metagenome	feces	Germany	Europe	‒	‒	WGS	METAGENOMIC	ILLUMINA	Illumina HiSeq 2500	PAIRED
SRR6122254	PRJNA412411	human gut metagenome	feces	Germany	Europe	‒	‒	WGS	METAGENOMIC	ILLUMINA	Illumina HiSeq 2500	PAIRED
SRR6122259	PRJNA412411	human gut metagenome	feces	Germany	Europe	‒	‒	WGS	METAGENOMIC	ILLUMINA	Illumina HiSeq 2500	PAIRED
SRR6122261	PRJNA412411	human gut metagenome	feces	Germany	Europe	‒	‒	WGS	METAGENOMIC	ILLUMINA	Illumina HiSeq 2500	PAIRED
SRR6122262	PRJNA412411	human gut metagenome	feces	Germany	Europe	‒	‒	WGS	METAGENOMIC	ILLUMINA	Illumina HiSeq 2500	PAIRED
SRR6122275	PRJNA412411	human gut metagenome	feces	Germany	Europe	‒	‒	WGS	METAGENOMIC	ILLUMINA	Illumina HiSeq 2500	PAIRED
SRR6122276	PRJNA412411	human gut metagenome	feces	Germany	Europe	‒	‒	WGS	METAGENOMIC	ILLUMINA	Illumina HiSeq 2500	PAIRED
SRR6122277	PRJNA412411	human gut metagenome	feces	Germany	Europe	‒	‒	WGS	METAGENOMIC	ILLUMINA	Illumina HiSeq 2500	PAIRED
SRR6122278	PRJNA412411	human gut metagenome	feces	Germany	Europe	‒	‒	WGS	METAGENOMIC	ILLUMINA	Illumina HiSeq 2500	PAIRED
SRR6122283	PRJNA412411	human gut metagenome	feces	Germany	Europe	‒	‒	WGS	METAGENOMIC	ILLUMINA	Illumina HiSeq 2500	PAIRED
SRR6122284	PRJNA412411	human gut metagenome	feces	Germany	Europe	‒	‒	WGS	METAGENOMIC	ILLUMINA	Illumina HiSeq 2500	PAIRED
SRR6179070	PRJNA414479	human gut metagenome	feces	USA	North America	‒	‒	WGS	METAGENOMIC	ILLUMINA	Illumina HiSeq 2500	PAIRED
SRR6179071	PRJNA414479	human gut metagenome	feces	USA	North America	‒	‒	WGS	METAGENOMIC	ILLUMINA	Illumina HiSeq 2500	PAIRED
SRR6179072	PRJNA414479	human gut metagenome	feces	USA	North America	‒	‒	WGS	METAGENOMIC	ILLUMINA	Illumina HiSeq 2500	PAIRED
SRR6179073	PRJNA414479	human gut metagenome	feces	USA	North America	‒	‒	WGS	METAGENOMIC	ILLUMINA	Illumina HiSeq 2500	PAIRED
SRR6179074	PRJNA414479	human gut metagenome	feces	USA	North America	‒	‒	WGS	METAGENOMIC	ILLUMINA	Illumina HiSeq 2500	PAIRED
SRR6179075	PRJNA414479	human gut metagenome	feces	USA	North America	‒	‒	WGS	METAGENOMIC	ILLUMINA	Illumina HiSeq 2500	PAIRED
SRR6179076	PRJNA414479	human gut metagenome	feces	USA	North America	‒	‒	WGS	METAGENOMIC	ILLUMINA	Illumina HiSeq 2500	PAIRED
SRR6179077	PRJNA414479	human gut metagenome	feces	USA	North America	‒	‒	WGS	METAGENOMIC	ILLUMINA	Illumina HiSeq 2500	PAIRED
SRR6179078	PRJNA414479	human gut metagenome	feces	USA	North America	‒	‒	WGS	METAGENOMIC	ILLUMINA	Illumina HiSeq 2500	PAIRED
SRR6179079	PRJNA414479	human gut metagenome	feces	USA	North America	‒	‒	WGS	METAGENOMIC	ILLUMINA	Illumina HiSeq 2500	PAIRED
SRR6303060	PRJNA418941	human gut metagenome	feces	Italy	Europe	‒	‒	WGS	METAGENOMIC	ILLUMINA	NextSeq 500	PAIRED
SRR6303061	PRJNA418941	human gut metagenome	feces	Italy	Europe	‒	‒	WGS	METAGENOMIC	ILLUMINA	NextSeq 500	PAIRED
SRR6303062	PRJNA418941	human gut metagenome	feces	Italy	Europe	‒	‒	WGS	METAGENOMIC	ILLUMINA	NextSeq 500	PAIRED
SRR6303066	PRJNA418941	human gut metagenome	feces	Italy	Europe	‒	‒	WGS	METAGENOMIC	ILLUMINA	NextSeq 500	PAIRED
SRR6303068	PRJNA418941	human gut metagenome	feces	Italy	Europe	‒	‒	WGS	METAGENOMIC	ILLUMINA	NextSeq 500	PAIRED
SRR6367587	PRJNA421881	human gut metagenome	feces	Italy	Europe	‒	‒	WGS	METAGENOMIC	ILLUMINA	NextSeq 500	PAIRED
SRR6367588	PRJNA421881	human gut metagenome	feces	Italy	Europe	‒	‒	WGS	METAGENOMIC	ILLUMINA	NextSeq 500	PAIRED
SRR6367589	PRJNA421881	human gut metagenome	feces	Italy	Europe	‒	‒	WGS	METAGENOMIC	ILLUMINA	NextSeq 500	PAIRED
SRR6367590	PRJNA421881	human gut metagenome	feces	Italy	Europe	‒	‒	WGS	METAGENOMIC	ILLUMINA	NextSeq 500	PAIRED
SRR6367591	PRJNA421881	human gut metagenome	feces	Italy	Europe	‒	‒	WGS	METAGENOMIC	ILLUMINA	NextSeq 500	PAIRED
SRR6367592	PRJNA421881	human gut metagenome	feces	Italy	Europe	‒	‒	WGS	METAGENOMIC	ILLUMINA	NextSeq 500	PAIRED
SRR6367593	PRJNA421881	human gut metagenome	feces	Italy	Europe	‒	‒	WGS	METAGENOMIC	ILLUMINA	NextSeq 500	PAIRED
SRR6367594	PRJNA421881	human gut metagenome	feces	Italy	Europe	‒	‒	WGS	METAGENOMIC	ILLUMINA	NextSeq 500	PAIRED
SRR6367595	PRJNA421881	human gut metagenome	feces	Italy	Europe	‒	‒	WGS	METAGENOMIC	ILLUMINA	NextSeq 500	PAIRED
SRR6367596	PRJNA421881	human gut metagenome	feces	Italy	Europe	‒	‒	WGS	METAGENOMIC	ILLUMINA	NextSeq 500	PAIRED
SRR6367597	PRJNA421881	human gut metagenome	feces	Italy	Europe	‒	‒	WGS	METAGENOMIC	ILLUMINA	NextSeq 500	PAIRED
SRR6367598	PRJNA421881	human gut metagenome	feces	Italy	Europe	‒	‒	WGS	METAGENOMIC	ILLUMINA	NextSeq 500	PAIRED
SRR6367599	PRJNA421881	human gut metagenome	feces	Italy	Europe	‒	‒	WGS	METAGENOMIC	ILLUMINA	NextSeq 500	PAIRED
SRR6367600	PRJNA421881	human gut metagenome	feces	Italy	Europe	‒	‒	WGS	METAGENOMIC	ILLUMINA	NextSeq 500	PAIRED
SRR8146935	PRJNA421881	human gut metagenome	feces	Italy	Europe	‒	‒	WGS	METAGENOMIC	ILLUMINA	NextSeq 500	PAIRED
SRR8146936	PRJNA421881	human gut metagenome	feces	Italy	Europe	‒	‒	WGS	METAGENOMIC	ILLUMINA	NextSeq 500	PAIRED
SRR8146937	PRJNA421881	human gut metagenome	feces	Italy	Europe	‒	‒	WGS	METAGENOMIC	ILLUMINA	NextSeq 500	PAIRED
SRR8146938	PRJNA421881	human gut metagenome	feces	Italy	Europe	‒	‒	WGS	METAGENOMIC	ILLUMINA	NextSeq 500	PAIRED
SRR8146939	PRJNA421881	human gut metagenome	feces	Italy	Europe	‒	‒	WGS	METAGENOMIC	ILLUMINA	NextSeq 500	PAIRED
SRR8146940	PRJNA421881	human gut metagenome	feces	Italy	Europe	‒	‒	WGS	METAGENOMIC	ILLUMINA	NextSeq 500	PAIRED
SRR8146941	PRJNA421881	human gut metagenome	feces	Italy	Europe	‒	‒	WGS	METAGENOMIC	ILLUMINA	NextSeq 500	PAIRED
SRR8146942	PRJNA421881	human gut metagenome	feces	Italy	Europe	‒	‒	WGS	METAGENOMIC	ILLUMINA	NextSeq 500	PAIRED
SRR8146943	PRJNA421881	human gut metagenome	feces	Italy	Europe	‒	‒	WGS	METAGENOMIC	ILLUMINA	NextSeq 500	PAIRED
SRR8146944	PRJNA421881	human gut metagenome	feces	Italy	Europe	‒	‒	WGS	METAGENOMIC	ILLUMINA	NextSeq 500	PAIRED
SRR8146945	PRJNA421881	human gut metagenome	feces	Italy	Europe	‒	‒	WGS	METAGENOMIC	ILLUMINA	NextSeq 500	PAIRED
SRR8146946	PRJNA421881	human gut metagenome	feces	Italy	Europe	‒	‒	WGS	METAGENOMIC	ILLUMINA	NextSeq 500	PAIRED
SRR8146947	PRJNA421881	human gut metagenome	feces	Italy	Europe	‒	‒	WGS	METAGENOMIC	ILLUMINA	NextSeq 500	PAIRED
SRR8146948	PRJNA421881	human gut metagenome	feces	Italy	Europe	‒	‒	WGS	METAGENOMIC	ILLUMINA	NextSeq 500	PAIRED
SRR8146949	PRJNA421881	human gut metagenome	feces	Italy	Europe	‒	‒	WGS	METAGENOMIC	ILLUMINA	NextSeq 500	PAIRED
SRR8146950	PRJNA421881	human gut metagenome	feces	Italy	Europe	‒	‒	WGS	METAGENOMIC	ILLUMINA	NextSeq 500	PAIRED
SRR8146951	PRJNA421881	human gut metagenome	feces	Italy	Europe	‒	‒	WGS	METAGENOMIC	ILLUMINA	NextSeq 500	PAIRED
SRR8146952	PRJNA421881	human gut metagenome	feces	Italy	Europe	‒	‒	WGS	METAGENOMIC	ILLUMINA	NextSeq 500	PAIRED
SRR8146953	PRJNA421881	human gut metagenome	feces	Italy	Europe	‒	‒	WGS	METAGENOMIC	ILLUMINA	NextSeq 500	PAIRED
SRR8146954	PRJNA421881	human gut metagenome	feces	Italy	Europe	‒	‒	WGS	METAGENOMIC	ILLUMINA	NextSeq 500	PAIRED
SRR8146955	PRJNA421881	human gut metagenome	feces	Italy	Europe	‒	‒	WGS	METAGENOMIC	ILLUMINA	NextSeq 500	PAIRED
SRR8146956	PRJNA421881	human gut metagenome	feces	Italy	Europe	‒	‒	WGS	METAGENOMIC	ILLUMINA	NextSeq 500	PAIRED
SRR8146957	PRJNA421881	human gut metagenome	feces	Italy	Europe	‒	‒	WGS	METAGENOMIC	ILLUMINA	NextSeq 500	PAIRED
SRR8146958	PRJNA421881	human gut metagenome	feces	Italy	Europe	‒	‒	WGS	METAGENOMIC	ILLUMINA	NextSeq 500	PAIRED
SRR8146959	PRJNA421881	human gut metagenome	feces	Italy	Europe	‒	‒	WGS	METAGENOMIC	ILLUMINA	NextSeq 500	PAIRED
SRR8146960	PRJNA421881	human gut metagenome	feces	Italy	Europe	‒	‒	WGS	METAGENOMIC	ILLUMINA	NextSeq 500	PAIRED
SRR8146961	PRJNA421881	human gut metagenome	feces	Italy	Europe	‒	‒	WGS	METAGENOMIC	ILLUMINA	NextSeq 500	PAIRED
SRR8146962	PRJNA421881	human gut metagenome	feces	Italy	Europe	‒	‒	WGS	METAGENOMIC	ILLUMINA	NextSeq 500	PAIRED
SRR8146963	PRJNA421881	human gut metagenome	feces	Italy	Europe	‒	‒	WGS	METAGENOMIC	ILLUMINA	NextSeq 500	PAIRED
SRR8146964	PRJNA421881	human gut metagenome	feces	Italy	Europe	‒	‒	WGS	METAGENOMIC	ILLUMINA	NextSeq 500	PAIRED
SRR8146965	PRJNA421881	human gut metagenome	feces	Italy	Europe	‒	‒	WGS	METAGENOMIC	ILLUMINA	NextSeq 500	PAIRED
SRR8146966	PRJNA421881	human gut metagenome	feces	Italy	Europe	‒	‒	WGS	METAGENOMIC	ILLUMINA	NextSeq 500	PAIRED
SRR8146967	PRJNA421881	human gut metagenome	feces	Italy	Europe	‒	‒	WGS	METAGENOMIC	ILLUMINA	NextSeq 500	PAIRED
SRR8146968	PRJNA421881	human gut metagenome	feces	Italy	Europe	‒	‒	WGS	METAGENOMIC	ILLUMINA	NextSeq 500	PAIRED
SRR8146969	PRJNA421881	human gut metagenome	feces	Italy	Europe	‒	‒	WGS	METAGENOMIC	ILLUMINA	NextSeq 500	PAIRED
SRR8146970	PRJNA421881	human gut metagenome	feces	Italy	Europe	‒	‒	WGS	METAGENOMIC	ILLUMINA	NextSeq 500	PAIRED
SRR8146971	PRJNA421881	human gut metagenome	feces	Italy	Europe	‒	‒	WGS	METAGENOMIC	ILLUMINA	NextSeq 500	PAIRED
SRR8146972	PRJNA421881	human gut metagenome	feces	Italy	Europe	‒	‒	WGS	METAGENOMIC	ILLUMINA	NextSeq 500	PAIRED
SRR8146973	PRJNA421881	human gut metagenome	feces	Italy	Europe	‒	‒	WGS	METAGENOMIC	ILLUMINA	NextSeq 500	PAIRED
SRR8146974	PRJNA421881	human gut metagenome	feces	Italy	Europe	‒	‒	WGS	METAGENOMIC	ILLUMINA	NextSeq 500	PAIRED
SRR8146975	PRJNA421881	human gut metagenome	feces	Italy	Europe	‒	‒	WGS	METAGENOMIC	ILLUMINA	NextSeq 500	PAIRED
SRR8146976	PRJNA421881	human gut metagenome	feces	Italy	Europe	‒	‒	WGS	METAGENOMIC	ILLUMINA	NextSeq 500	PAIRED
SRR8146978	PRJNA421881	human gut metagenome	feces	Italy	Europe	‒	‒	WGS	METAGENOMIC	ILLUMINA	NextSeq 500	PAIRED
SRR8146979	PRJNA421881	human gut metagenome	feces	Italy	Europe	‒	‒	WGS	METAGENOMIC	ILLUMINA	NextSeq 500	PAIRED
SRR8146980	PRJNA421881	human gut metagenome	feces	Italy	Europe	‒	‒	WGS	METAGENOMIC	ILLUMINA	NextSeq 500	PAIRED
SRR8146981	PRJNA421881	human gut metagenome	feces	Italy	Europe	‒	‒	WGS	METAGENOMIC	ILLUMINA	NextSeq 500	PAIRED
SRR8146982	PRJNA421881	human gut metagenome	feces	Italy	Europe	‒	‒	WGS	METAGENOMIC	ILLUMINA	NextSeq 500	PAIRED
SRR8146983	PRJNA421881	human gut metagenome	feces	Italy	Europe	‒	‒	WGS	METAGENOMIC	ILLUMINA	NextSeq 500	PAIRED
SRR8146984	PRJNA421881	human gut metagenome	feces	Italy	Europe	‒	‒	WGS	METAGENOMIC	ILLUMINA	NextSeq 500	PAIRED
SRR8146985	PRJNA421881	human gut metagenome	feces	Italy	Europe	‒	‒	WGS	METAGENOMIC	ILLUMINA	NextSeq 500	PAIRED
SRR8146986	PRJNA421881	human gut metagenome	feces	Italy	Europe	‒	‒	WGS	METAGENOMIC	ILLUMINA	NextSeq 500	PAIRED
SRR8146987	PRJNA421881	human gut metagenome	feces	Italy	Europe	‒	‒	WGS	METAGENOMIC	ILLUMINA	NextSeq 500	PAIRED
SRR8146988	PRJNA421881	human gut metagenome	feces	Italy	Europe	‒	‒	WGS	METAGENOMIC	ILLUMINA	NextSeq 500	PAIRED
SRR8146989	PRJNA421881	human gut metagenome	feces	Italy	Europe	‒	‒	WGS	METAGENOMIC	ILLUMINA	NextSeq 500	PAIRED
SRR8146990	PRJNA421881	human gut metagenome	feces	Italy	Europe	‒	‒	WGS	METAGENOMIC	ILLUMINA	NextSeq 500	PAIRED
SRR8146991	PRJNA421881	human gut metagenome	feces	Italy	Europe	‒	‒	WGS	METAGENOMIC	ILLUMINA	NextSeq 500	PAIRED
SRR8146992	PRJNA421881	human gut metagenome	feces	Italy	Europe	‒	‒	WGS	METAGENOMIC	ILLUMINA	NextSeq 500	PAIRED
SRR8146993	PRJNA421881	human gut metagenome	feces	Italy	Europe	‒	‒	WGS	METAGENOMIC	ILLUMINA	NextSeq 500	PAIRED
SRR8146994	PRJNA421881	human gut metagenome	feces	Italy	Europe	‒	‒	WGS	METAGENOMIC	ILLUMINA	NextSeq 500	PAIRED
SRR7726388	PRJNA428202	human gut metagenome	stool	USA	North America	21.3	female	WGS	METAGENOMIC	ILLUMINA	Illumina MiSeq	PAIRED
SRR7726389	PRJNA428202	human gut metagenome	stool	USA	North America	21.3	female	WGS	METAGENOMIC	ILLUMINA	Illumina MiSeq	PAIRED
SRR7726390	PRJNA428202	human gut metagenome	stool	USA	North America	27.52	male	WGS	METAGENOMIC	ILLUMINA	Illumina MiSeq	PAIRED
SRR7726391	PRJNA428202	human gut metagenome	stool	USA	North America	27.52	male	WGS	METAGENOMIC	ILLUMINA	Illumina MiSeq	PAIRED
SRR7726392	PRJNA428202	human gut metagenome	stool	USA	North America	27.52	male	WGS	METAGENOMIC	ILLUMINA	Illumina MiSeq	PAIRED
SRR7726393	PRJNA428202	human gut metagenome	stool	USA	North America	22.97	female	WGS	METAGENOMIC	ILLUMINA	Illumina MiSeq	PAIRED
SRR7726394	PRJNA428202	human gut metagenome	stool	USA	North America	22.97	female	WGS	METAGENOMIC	ILLUMINA	Illumina MiSeq	PAIRED
SRR7726395	PRJNA428202	human gut metagenome	stool	USA	North America	22.97	female	WGS	METAGENOMIC	ILLUMINA	Illumina MiSeq	PAIRED
SRR7726396	PRJNA428202	human gut metagenome	stool	USA	North America	26.2	female	WGS	METAGENOMIC	ILLUMINA	Illumina MiSeq	PAIRED
SRR7726397	PRJNA428202	human gut metagenome	stool	USA	North America	26.2	female	WGS	METAGENOMIC	ILLUMINA	Illumina MiSeq	PAIRED
SRR7726398	PRJNA428202	human gut metagenome	stool	USA	North America	32.83	female	WGS	METAGENOMIC	ILLUMINA	Illumina MiSeq	PAIRED
SRR7726399	PRJNA428202	human gut metagenome	stool	USA	North America	26.2	female	WGS	METAGENOMIC	ILLUMINA	Illumina MiSeq	PAIRED
SRR7726400	PRJNA428202	human gut metagenome	stool	USA	North America	32.83	female	WGS	METAGENOMIC	ILLUMINA	Illumina MiSeq	PAIRED
SRR7726401	PRJNA428202	human gut metagenome	stool	USA	North America	32.83	female	WGS	METAGENOMIC	ILLUMINA	Illumina MiSeq	PAIRED
SRR7726402	PRJNA428202	human gut metagenome	stool	USA	North America	23.17	male	WGS	METAGENOMIC	ILLUMINA	Illumina MiSeq	PAIRED
SRR7726403	PRJNA428202	human gut metagenome	stool	USA	North America	23.17	male	WGS	METAGENOMIC	ILLUMINA	Illumina MiSeq	PAIRED
SRR7726404	PRJNA428202	human gut metagenome	stool	USA	North America	21.03	male	WGS	METAGENOMIC	ILLUMINA	Illumina MiSeq	PAIRED
SRR7726405	PRJNA428202	human gut metagenome	stool	USA	North America	21.03	male	WGS	METAGENOMIC	ILLUMINA	Illumina MiSeq	PAIRED
SRR7726406	PRJNA428202	human gut metagenome	stool	USA	North America	21.42	male	WGS	METAGENOMIC	ILLUMINA	Illumina MiSeq	PAIRED
SRR7726407	PRJNA428202	human gut metagenome	stool	USA	North America	21.42	male	WGS	METAGENOMIC	ILLUMINA	Illumina MiSeq	PAIRED
SRR7726408	PRJNA428202	human gut metagenome	stool	USA	North America	21.42	male	WGS	METAGENOMIC	ILLUMINA	Illumina MiSeq	PAIRED
SRR7726409	PRJNA428202	human gut metagenome	stool	USA	North America	23.17	male	WGS	METAGENOMIC	ILLUMINA	Illumina MiSeq	PAIRED
SRR7726410	PRJNA428202	human gut metagenome	stool	USA	North America	21.03	male	WGS	METAGENOMIC	ILLUMINA	Illumina MiSeq	PAIRED
SRR7726411	PRJNA428202	human gut metagenome	stool	USA	North America	21.3	female	WGS	METAGENOMIC	ILLUMINA	Illumina MiSeq	PAIRED
SRR8675870	PRJNA431482	human gut metagenome	feces	China	Asia	42	‒	WGS	METAGENOMIC	ILLUMINA	Illumina HiSeq 4000	PAIRED
SRR8675871	PRJNA431482	human gut metagenome	feces	China	Asia	54	‒	WGS	METAGENOMIC	ILLUMINA	Illumina HiSeq 4000	PAIRED
SRR8675872	PRJNA431482	human gut metagenome	feces	China	Asia	27	‒	WGS	METAGENOMIC	ILLUMINA	Illumina HiSeq 4000	PAIRED
SRR8675873	PRJNA431482	human gut metagenome	feces	China	Asia	48	‒	WGS	METAGENOMIC	ILLUMINA	Illumina HiSeq 4000	PAIRED
SRR8675874	PRJNA431482	human gut metagenome	feces	China	Asia	32	‒	WGS	METAGENOMIC	ILLUMINA	Illumina HiSeq 4000	PAIRED
SRR8675875	PRJNA431482	human gut metagenome	feces	China	Asia	27	‒	WGS	METAGENOMIC	ILLUMINA	Illumina HiSeq 4000	PAIRED
SRR8675876	PRJNA431482	human gut metagenome	feces	China	Asia	38	‒	WGS	METAGENOMIC	ILLUMINA	Illumina HiSeq 4000	PAIRED
SRR8675877	PRJNA431482	human gut metagenome	feces	China	Asia	27	‒	WGS	METAGENOMIC	ILLUMINA	Illumina HiSeq 4000	PAIRED
SRR8675878	PRJNA431482	human gut metagenome	feces	China	Asia	36	‒	WGS	METAGENOMIC	ILLUMINA	Illumina HiSeq 4000	PAIRED
SRR8675879	PRJNA431482	human gut metagenome	feces	China	Asia	33	‒	WGS	METAGENOMIC	ILLUMINA	Illumina HiSeq 4000	PAIRED
SRR8675880	PRJNA431482	human gut metagenome	feces	China	Asia	35	‒	WGS	METAGENOMIC	ILLUMINA	Illumina HiSeq 4000	PAIRED
SRR8675881	PRJNA431482	human gut metagenome	feces	China	Asia	46	‒	WGS	METAGENOMIC	ILLUMINA	Illumina HiSeq 4000	PAIRED
SRR8675882	PRJNA431482	human gut metagenome	feces	China	Asia	26	‒	WGS	METAGENOMIC	ILLUMINA	Illumina HiSeq 4000	PAIRED
SRR8675883	PRJNA431482	human gut metagenome	feces	China	Asia	34	‒	WGS	METAGENOMIC	ILLUMINA	Illumina HiSeq 4000	PAIRED
SRR8675884	PRJNA431482	human gut metagenome	feces	China	Asia	27	‒	WGS	METAGENOMIC	ILLUMINA	Illumina HiSeq 4000	PAIRED
SRR8675885	PRJNA431482	human gut metagenome	feces	China	Asia	25	‒	WGS	METAGENOMIC	ILLUMINA	Illumina HiSeq 4000	PAIRED
SRR8675886	PRJNA431482	human gut metagenome	feces	China	Asia	28	‒	WGS	METAGENOMIC	ILLUMINA	Illumina HiSeq 4000	PAIRED
SRR8675887	PRJNA431482	human gut metagenome	feces	China	Asia	28	‒	WGS	METAGENOMIC	ILLUMINA	Illumina HiSeq 4000	PAIRED
SRR8675888	PRJNA431482	human gut metagenome	feces	China	Asia	46	‒	WGS	METAGENOMIC	ILLUMINA	Illumina HiSeq 4000	PAIRED
SRR8675889	PRJNA431482	human gut metagenome	feces	China	Asia	36	‒	WGS	METAGENOMIC	ILLUMINA	Illumina HiSeq 4000	PAIRED
SRR8675890	PRJNA431482	human gut metagenome	feces	China	Asia	70	‒	WGS	METAGENOMIC	ILLUMINA	Illumina HiSeq 4000	PAIRED
SRR8675891	PRJNA431482	human gut metagenome	feces	China	Asia	45	‒	WGS	METAGENOMIC	ILLUMINA	Illumina HiSeq 4000	PAIRED
SRR8675892	PRJNA431482	human gut metagenome	feces	China	Asia	48	‒	WGS	METAGENOMIC	ILLUMINA	Illumina HiSeq 4000	PAIRED
SRR8675893	PRJNA431482	human gut metagenome	feces	China	Asia	46	‒	WGS	METAGENOMIC	ILLUMINA	Illumina HiSeq 4000	PAIRED
SRR8675894	PRJNA431482	human gut metagenome	feces	China	Asia	36	‒	WGS	METAGENOMIC	ILLUMINA	Illumina HiSeq 4000	PAIRED
SRR8675895	PRJNA431482	human gut metagenome	feces	China	Asia	75	‒	WGS	METAGENOMIC	ILLUMINA	Illumina HiSeq 4000	PAIRED
SRR8675896	PRJNA431482	human gut metagenome	feces	China	Asia	60	‒	WGS	METAGENOMIC	ILLUMINA	Illumina HiSeq 4000	PAIRED
SRR8675897	PRJNA431482	human gut metagenome	feces	China	Asia	34	‒	WGS	METAGENOMIC	ILLUMINA	Illumina HiSeq 4000	PAIRED
SRR8675898	PRJNA431482	human gut metagenome	feces	China	Asia	60	‒	WGS	METAGENOMIC	ILLUMINA	Illumina HiSeq 4000	PAIRED
SRR8675899	PRJNA431482	human gut metagenome	feces	China	Asia	26	‒	WGS	METAGENOMIC	ILLUMINA	Illumina HiSeq 4000	PAIRED
SRR8675900	PRJNA431482	human gut metagenome	feces	China	Asia	63	‒	WGS	METAGENOMIC	ILLUMINA	Illumina HiSeq 4000	PAIRED
SRR8675901	PRJNA431482	human gut metagenome	feces	China	Asia	75	‒	WGS	METAGENOMIC	ILLUMINA	Illumina HiSeq 4000	PAIRED
SRR8675902	PRJNA431482	human gut metagenome	feces	China	Asia	31	‒	WGS	METAGENOMIC	ILLUMINA	Illumina HiSeq 4000	PAIRED
SRR8675903	PRJNA431482	human gut metagenome	feces	China	Asia	38	‒	WGS	METAGENOMIC	ILLUMINA	Illumina HiSeq 4000	PAIRED
SRR8675904	PRJNA431482	human gut metagenome	feces	China	Asia	48	‒	WGS	METAGENOMIC	ILLUMINA	Illumina HiSeq 4000	PAIRED
SRR8675905	PRJNA431482	human gut metagenome	feces	China	Asia	25	‒	WGS	METAGENOMIC	ILLUMINA	Illumina HiSeq 4000	PAIRED
SRR8675906	PRJNA431482	human gut metagenome	feces	China	Asia	51	‒	WGS	METAGENOMIC	ILLUMINA	Illumina HiSeq 4000	PAIRED
SRR8675907	PRJNA431482	human gut metagenome	feces	China	Asia	40	‒	WGS	METAGENOMIC	ILLUMINA	Illumina HiSeq 4000	PAIRED
SRR8675908	PRJNA431482	human gut metagenome	feces	China	Asia	48	‒	WGS	METAGENOMIC	ILLUMINA	Illumina HiSeq 4000	PAIRED
SRR8675909	PRJNA431482	human gut metagenome	feces	China	Asia	19	‒	WGS	METAGENOMIC	ILLUMINA	Illumina HiSeq 4000	PAIRED
SRR8675910	PRJNA431482	human gut metagenome	feces	China	Asia	50	‒	WGS	METAGENOMIC	ILLUMINA	Illumina HiSeq 4000	PAIRED
SRR8675911	PRJNA431482	human gut metagenome	feces	China	Asia	35	‒	WGS	METAGENOMIC	ILLUMINA	Illumina HiSeq 4000	PAIRED
SRR8675912	PRJNA431482	human gut metagenome	feces	China	Asia	70	‒	WGS	METAGENOMIC	ILLUMINA	Illumina HiSeq 4000	PAIRED
SRR8675913	PRJNA431482	human gut metagenome	feces	China	Asia	30	‒	WGS	METAGENOMIC	ILLUMINA	Illumina HiSeq 4000	PAIRED
SRR8675914	PRJNA431482	human gut metagenome	feces	China	Asia	59	‒	WGS	METAGENOMIC	ILLUMINA	Illumina HiSeq 4000	PAIRED
SRR8675915	PRJNA431482	human gut metagenome	feces	China	Asia	34	‒	WGS	METAGENOMIC	ILLUMINA	Illumina HiSeq 4000	PAIRED
SRR8675916	PRJNA431482	human gut metagenome	feces	China	Asia	44	‒	WGS	METAGENOMIC	ILLUMINA	Illumina HiSeq 4000	PAIRED
SRR8675917	PRJNA431482	human gut metagenome	feces	China	Asia	21	‒	WGS	METAGENOMIC	ILLUMINA	Illumina HiSeq 4000	PAIRED
SRR8675918	PRJNA431482	human gut metagenome	feces	China	Asia	38	‒	WGS	METAGENOMIC	ILLUMINA	Illumina HiSeq 4000	PAIRED
SRR8675919	PRJNA431482	human gut metagenome	feces	China	Asia	34	‒	WGS	METAGENOMIC	ILLUMINA	Illumina HiSeq 4000	PAIRED
SRR8675920	PRJNA431482	human gut metagenome	feces	China	Asia	75	‒	WGS	METAGENOMIC	ILLUMINA	Illumina HiSeq 4000	PAIRED
SRR8675921	PRJNA431482	human gut metagenome	feces	China	Asia	46	‒	WGS	METAGENOMIC	ILLUMINA	Illumina HiSeq 4000	PAIRED
SRR7124572	PRJNA449784	human gut metagenome	feces	China	Asia	‒	‒	WGS	METAGENOMIC	ILLUMINA	HiSeq X Ten	PAIRED
SRR7124582	PRJNA449784	human gut metagenome	feces	China	Asia	‒	‒	WGS	METAGENOMIC	ILLUMINA	HiSeq X Ten	PAIRED
SRR7124583	PRJNA449784	human gut metagenome	feces	China	Asia	‒	‒	WGS	METAGENOMIC	ILLUMINA	HiSeq X Ten	PAIRED
SRR7124584	PRJNA449784	human gut metagenome	feces	China	Asia	‒	‒	WGS	METAGENOMIC	ILLUMINA	HiSeq X Ten	PAIRED
SRR7124585	PRJNA449784	human gut metagenome	feces	China	Asia	‒	‒	WGS	METAGENOMIC	ILLUMINA	HiSeq X Ten	PAIRED
SRR7124586	PRJNA449784	human gut metagenome	feces	China	Asia	‒	‒	WGS	METAGENOMIC	ILLUMINA	HiSeq X Ten	PAIRED
SRR7124587	PRJNA449784	human gut metagenome	feces	China	Asia	‒	‒	WGS	METAGENOMIC	ILLUMINA	HiSeq X Ten	PAIRED
SRR7124590	PRJNA449784	human gut metagenome	feces	China	Asia	‒	‒	WGS	METAGENOMIC	ILLUMINA	HiSeq X Ten	PAIRED
SRR7124591	PRJNA449784	human gut metagenome	feces	China	Asia	‒	‒	WGS	METAGENOMIC	ILLUMINA	HiSeq X Ten	PAIRED
SRR7124601	PRJNA449784	human gut metagenome	feces	China	Asia	‒	‒	WGS	METAGENOMIC	ILLUMINA	HiSeq X Ten	PAIRED
SRR7124602	PRJNA449784	human gut metagenome	feces	China	Asia	‒	‒	WGS	METAGENOMIC	ILLUMINA	HiSeq X Ten	PAIRED
SRR7124605	PRJNA449784	human gut metagenome	feces	China	Asia	‒	‒	WGS	METAGENOMIC	ILLUMINA	HiSeq X Ten	PAIRED
SRR7124606	PRJNA449784	human gut metagenome	feces	China	Asia	‒	‒	WGS	METAGENOMIC	ILLUMINA	HiSeq X Ten	PAIRED
SRR7124607	PRJNA449784	human gut metagenome	feces	China	Asia	‒	‒	WGS	METAGENOMIC	ILLUMINA	HiSeq X Ten	PAIRED
SRR7124608	PRJNA449784	human gut metagenome	feces	China	Asia	‒	‒	WGS	METAGENOMIC	ILLUMINA	HiSeq X Ten	PAIRED
SRR7124636	PRJNA449784	human gut metagenome	feces	China	Asia	‒	‒	WGS	METAGENOMIC	ILLUMINA	HiSeq X Ten	PAIRED
SRR7124647	PRJNA449784	human gut metagenome	feces	China	Asia	‒	‒	WGS	METAGENOMIC	ILLUMINA	HiSeq X Ten	PAIRED
SRR7124674	PRJNA449784	human gut metagenome	feces	China	Asia	‒	‒	WGS	METAGENOMIC	ILLUMINA	HiSeq X Ten	PAIRED
SRR7124676	PRJNA449784	human gut metagenome	feces	China	Asia	‒	‒	WGS	METAGENOMIC	ILLUMINA	HiSeq X Ten	PAIRED
SRR7124678	PRJNA449784	human gut metagenome	feces	China	Asia	‒	‒	WGS	METAGENOMIC	ILLUMINA	HiSeq X Ten	PAIRED
SRR7124679	PRJNA449784	human gut metagenome	feces	China	Asia	‒	‒	WGS	METAGENOMIC	ILLUMINA	HiSeq X Ten	PAIRED
SRR7124680	PRJNA449784	human gut metagenome	feces	China	Asia	‒	‒	WGS	METAGENOMIC	ILLUMINA	HiSeq X Ten	PAIRED
SRR7124693	PRJNA449784	human gut metagenome	feces	China	Asia	‒	‒	WGS	METAGENOMIC	ILLUMINA	HiSeq X Ten	PAIRED
SRR7124695	PRJNA449784	human gut metagenome	feces	China	Asia	‒	‒	WGS	METAGENOMIC	ILLUMINA	HiSeq X Ten	PAIRED
SRR7124696	PRJNA449784	human gut metagenome	feces	China	Asia	‒	‒	WGS	METAGENOMIC	ILLUMINA	HiSeq X Ten	PAIRED
SRR7124697	PRJNA449784	human gut metagenome	feces	China	Asia	‒	‒	WGS	METAGENOMIC	ILLUMINA	HiSeq X Ten	PAIRED
SRR7124698	PRJNA449784	human gut metagenome	feces	China	Asia	‒	‒	WGS	METAGENOMIC	ILLUMINA	HiSeq X Ten	PAIRED
SRR7124699	PRJNA449784	human gut metagenome	feces	China	Asia	‒	‒	WGS	METAGENOMIC	ILLUMINA	HiSeq X Ten	PAIRED
SRR7124700	PRJNA449784	human gut metagenome	feces	China	Asia	‒	‒	WGS	METAGENOMIC	ILLUMINA	HiSeq X Ten	PAIRED
SRR7124701	PRJNA449784	human gut metagenome	feces	China	Asia	‒	‒	WGS	METAGENOMIC	ILLUMINA	HiSeq X Ten	PAIRED
SRR7124702	PRJNA449784	human gut metagenome	feces	China	Asia	‒	‒	WGS	METAGENOMIC	ILLUMINA	HiSeq X Ten	PAIRED
SRR7124703	PRJNA449784	human gut metagenome	feces	China	Asia	‒	‒	WGS	METAGENOMIC	ILLUMINA	HiSeq X Ten	PAIRED
SRR7124706	PRJNA449784	human gut metagenome	feces	China	Asia	‒	‒	WGS	METAGENOMIC	ILLUMINA	HiSeq X Ten	PAIRED
SRR7124717	PRJNA449784	human gut metagenome	feces	China	Asia	‒	‒	WGS	METAGENOMIC	ILLUMINA	HiSeq X Ten	PAIRED
SRR7124718	PRJNA449784	human gut metagenome	feces	China	Asia	‒	‒	WGS	METAGENOMIC	ILLUMINA	HiSeq X Ten	PAIRED
SRR7124720	PRJNA449784	human gut metagenome	feces	China	Asia	‒	‒	WGS	METAGENOMIC	ILLUMINA	HiSeq X Ten	PAIRED
SRR7124721	PRJNA449784	human gut metagenome	feces	China	Asia	‒	‒	WGS	METAGENOMIC	ILLUMINA	HiSeq X Ten	PAIRED
SRR7124722	PRJNA449784	human gut metagenome	feces	China	Asia	‒	‒	WGS	METAGENOMIC	ILLUMINA	HiSeq X Ten	PAIRED
SRR7124723	PRJNA449784	human gut metagenome	feces	China	Asia	‒	‒	WGS	METAGENOMIC	ILLUMINA	HiSeq X Ten	PAIRED
[truncated: 2,021 more rows]

## Sheet: Table S2
Table S2. Bifidobacterium breve correlation among the microbiome of 4,019 human fecal samples of healthy adults.
	cor value (in respecto to B. breve)	p value (related to the correlation analyses)	R2 > 0.2, FDR p-values < 0.01 (bacterial species that are significant in terms of their impact on the human gut microbiota variability)†
Bifidobacterium longum	0.231619	0	**
Enterococcus avium	0.192115	0
Eggerthella lenta	0.159664	0	**
Sellimonas intestinalis	0.155471	0	**
Clostridium innocuum	0.144301	0	**
Bifidobacterium bifidum	0.14269	0	**
Bifidobacterium pseudocatenulatum	0.140709	0	**
Ruminococcus gnavus	0.125699	5.65553e-13	**
Lactobacillus gasseri	0.123932	1.29898e-12
Blautia coccoides	0.121695	3.66327e-12
Fusobacterium nucleatum	0.117525	2.4188e-11
Bifidobacterium catenulatum	0.117446	2.50474e-11	**
Erysipelatoclostridium ramosum	0.115414	6.09789e-11	**
Veillonella ratti	0.103852	7.20713e-09
Blautia producta	0.103415	8.56183e-09
Bifidobacterium reuteri	0.103285	8.99974e-09
Intestinibacter bartlettii	0.103064	9.79738e-09	**
Phoenicibacter congonensis	0.10185	1.56733e-08
Prevotella shahii	0.101243	1.97654e-08
Dysgonomonas gadei	0.100801	2.33389e-08
Clostridium butyricum	0.100704	2.42037e-08
Adlercreutzia muris	0.100636	2.48184e-08
Merdibacter massiliensis	0.10047	2.64132e-08
Anaerostipes caccae	0.0996	3.65923e-08	*
Veillonella atypica	0.0955457	1.62367e-07
Lactobacillus paracasei	0.091953	5.68481e-07	*
Lactobacillus amylovorus	0.0887879	1.65203e-06
Streptococcus salivarius	0.0867029	3.26626e-06	**
Lactobacillus mucosae	0.0854047	4.95101e-06
Gordonibacter pamelaeae	0.085028	5.57236e-06	**
Catenibacillus scindens	0.0810901	1.88194e-05
Anaerostipes hadrus	0.080242	2.42727e-05	**
Veillonella parvula	0.0793419	3.17143e-05	.
Romboutsia timonensis	0.0772819	5.79038e-05	**
Lactobacillus rhamnosus	0.076616	7.00313e-05	.
Bifidobacterium ruminantium	0.0728046	0.000200521	.
Merdimonas faecis	0.0719893	0.00024947	*
Veillonella seminalis	0.0716149	0.000275435
Acinetobacter towneri	0.0714034	0.000291374
Gemella sanguinis	0.0708577	0.000336298
Lampropedia hyalina	0.0695695	0.000469341
Peptococcus niger	0.0695305	0.000474207
Enterococcus faecium	0.0671901	0.000858564
Gordonibacter urolithinfaciens	0.0669058	0.000921935	**
Lactobacillus johnsonii	0.0658746	0.00118699
Bifidobacterium dentium	0.0640129	0.00185178
Enterococcus gallinarum	0.0621427	0.00285272
Propionibacterium freudenreichii	0.06067	0.00398035	*
Enterocloster clostridioformis	0.0588692	0.00591131	*
Longicatena caecimuris	0.058415	0.00651466	*
Blautia wexlerae	0.0568203	0.00910603	**
Staphylococcus epidermidis	0.0567145	0.00930828
Peptoniphilus lacrimalis	0.0560137	0.0107649
Streptococcus australis	0.0559435	0.0109193	**
Bifidobacterium adolescentis	0.0559258	0.01096	**
Dysgonomonas mossii	0.0551536	0.0128272
Asaccharobacter celatus	0.0545922	0.0143537	**
Megasphaera stantonii	0.0545587	0.0144463
Streptococcus sanguinis	0.0541079	0.0157836	.
Blautia hansenii	0.0538321	0.0166754	*
Citrobacter freundii	0.0500661	0.0338406
Amedibacterium intestinale	0.0492636	0.0391189
Coprococcus phoceensis	0.0489416	0.0414092	*
Enterococcus casseliflavus	0.0482998	0.0463647
Bifidobacterium saeculare	0.0479911	0.0488559
Streptococcus thermophilus	0.047955	0.0491722	**
Dysosmobacter welbionis	-0.0492987	0.0388761	**
Ruminococcus lactaris	-0.0498937	0.0349177	**
Prevotella rara	-0.0504054	0.0318331	.
Butyrivibrio crossotus	-0.0508231	0.0294706	**
Bilophila wadsworthia	-0.0517238	0.0249432	**
Alistipes senegalensis	-0.0532395	0.018729	**
Alistipes onderdonkii	-0.0532463	0.0187065	**
Prevotella pectinovora	-0.05448	0.014665	**
Catenibacterium mitsuokai	-0.0546573	0.0141676	**
Phocaeicola vulgatus	-0.0556977	0.0114835	**
Paraprevotella clara	-0.0569667	0.00883668	**
Butyricimonas virosa	-0.057241	0.00834121	**
Bacteroides intestinalis	-0.0574518	0.00798705	**
Bacteroides cellulosilyticus	-0.0577112	0.0075609	**
Prevotella stercorea	-0.0577962	0.00742823	**
Phocaeicola dorei	-0.0594874	0.00516675	**
Eubacterium siraeum	-0.059829	0.00479221	**
Phascolarctobacterium succinatutens	-0.05992	0.00469741	**
Alistipes finegoldii	-0.0612826	0.00346858	**
Parabacteroides merdae	-0.063657	0.00201165	**
Prevotella lascolaii	-0.0637015	0.00199198	**
Barnesiella intestinihominis	-0.063894	0.00190406	**
Gemmiger formicilis	-0.0649666	0.00147967	**
Prevotellamassilia timonensis	-0.0661873	0.00110076	**
Alistipes communis	-0.0674512	0.000803751	**
Coprococcus eutactus	-0.0697597	0.000446829	**
Holdemanella biformis	-0.0701293	0.000406142	**
Bacteroides faecis	-0.0709402	0.000328927	**
Bacteroides caccae	-0.0715816	0.000277871	**
Phocaeicola massiliensis	-0.0719068	0.000254869	**
Alistipes putredinis	-0.072382	0.000224684	**
Bacteroides uniformis	-0.0734181	0.000169837	**
Agathobaculum butyriciproducens	-0.0781232	4.53659e-05	**
Anaerotignum faecicola	-0.0794488	3.07424e-05	**
Bacteroides thetaiotaomicron	-0.0798336	2.73982e-05	**
Lachnospira eligens	-0.0849004	5.80491e-06	**
Roseburia hominis	-0.0875975	2.44021e-06	**
Alistipes shahii	-0.0879893	2.145e-06	**
Parabacteroides distasonis	-0.09304	3.91992e-07	**
Prevotella copri	-0.0934848	3.35888e-07	**
Roseburia intestinalis	-0.0951721	1.8506e-07	**
Eubacterium rectale	-0.0966676	1.08314e-07	**
Roseburia inulinivorans	-0.10745	1.72318e-09
Faecalibacterium prausnitzii	-0.109054	8.95201e-10	**
†statistically significant bacterial species were plotted on the PCoA through R-studios, representing bacterial species that drive the human gut microbiota biodiversity

## Sheet: Table S3
Table S3. B. breve strains carbohydrate growth assays through monitoring of optical density.
Carbohydrates	PRL2012#	LMG 13208#	adjusted p-value Benjamini–Hochberg test (*)
Arabinose	0.308778	0.222556	0
Fructose	1.03278	0.598333	0
Glucose	1.128	0.788	0
Mannitol	1.21667	0.673778	0.274645
Ramnose	0.233778	0.350889	0
Ribose	0.524222	0.288667	0.274645
Sorbitol	1.02844	0.768889	0
Xylose	0.174333	0.238556	0
Lactose	1.20778	0.908444	0
Maltose	1.07167	0.801	0
Melibiose	1.01711	0.826111	0
Sucrose	1.21211	0.813	0
Threalose	0.259556	0.343556	0
Turanose	1.04867	0.325667	0
Starch	0.251333	0.337111	0
Raffinose	1.00133	0.858	0
Lactulose	0.92775	0.667444	0
Cellobiose	0.794333	0.394889	0.274645
Fucose	0.384556	0.358111	0
Galactose	0.559556	0.481222	0.274645
Mannose	0.4385	0.365667	0
N-Acetyl-D-glucosamine	0.998889	0.729111	0
N-Acetyl-D-galactosamine	0.867333	0.306	0
Inulin	0.548333	0.513333	0.00488889
Amylopectin	0.222222	0.347	0.350625
Pullulan	1.24433	0.729778	0
Maltotriose	1.15467	0.856556	0
Maltodextrin	1.32767	0.721778	0
Glycogen	1.043	0.439778	0.73
Fructooligosaccharides (FOS)	0.739222	0.794222	0
Arabinogalactan	0.313	0.350222	0
Xylan	0.259333	0.402222	0
Mucin	0.176153	0.225889	0
(#) Data are expressed as the average of the obtained triplicates.
(*) Statistical significant p-values (Benjamini–Hochberg test) were highlighted in green.

## Sheet: Table S4
Table S4. Significative over- and under-expressed genes of PRL2012 in co-cultivation experiments.
PRL2012 gene	Bifidobacterium pseudocatenulatum LMG 10505	Bifidobacterium bifidum PRL2010	Bifidobacterium longum PRL2022	Clostridium innocuum 107F	Ruminococcus gnavus DSM 114966	Eggerthella lenta 180F	Multiple co-cultivation	Functional annotation	Transporters	TCDB code
PRL2012_0013	-	-	-	-	-	-	-1.81986	hypothetical protein
PRL2012_0019	-	-	-	-	-	-	-1.43016	hypothetical protein
PRL2012_0045	1.99252	-	-	-	-	-	2.55003	sodium/proline symporter	Proline uptake porter	2.A.21.2.5
PRL2012_0052	-	-	-	-	-	-	-1.38143	MFS transporter
PRL2012_0054	-	-	-	-	-	-	1.37751	glycogen/starch/alpha-glucan phosphorylase
PRL2012_0070	-1.61632	-	-	-	-	-	1.07641	Hsp20/alpha crystallin family protein
PRL2012_0071	-	-	1.49033	-	-	-	1.6617	aromatic amino acid DMT transporter YddG
PRL2012_0078	-	-	-	-	-	-	-1.10744	glycosyltransferase family 2 protein
PRL2012_0097	-	-1.04926	-	-	-1.60386	-	-2.00966	sucrose phosphorylase
PRL2012_0100	1.04817	-	-	-	-	-	2.20475	MHS family MFS transporter	metabolite transport	2.A.1.6.10
PRL2012_0102	1.04062	-	-	-	-	-	2.10292	ketol-acid reductoisomerase
PRL2012_0106	-1.02241	-	-	-	-	-	-	LPXTG cell wall anchor domain-containing protein
PRL2012_0109	-1.31736	-	-1.21095	-	-	-	-	alpha-amylase
PRL2012_0110	-1.23748	-	-	-	-	-	1.27077	extracellular solute-binding protein	Maltose/Maltotriose/maltodextrin ABC transporter	3.A.1.1.27
PRL2012_0111	-	-	-	-	-	-	3.15923	sugar ABC transporter permease	Maltose/Maltotriose/maltodextrin ABC transporter	3.A.1.1.27
PRL2012_0112	-	-	-	-	-	-	3.11301	sugar ABC transporter permease	Maltose/Maltotriose/maltodextrin ABC transporter	3.A.1.1.27
PRL2012_0114	-	-	-	-	-	-	1.29728	LacI family transcriptional regulator
PRL2012_0144	-	-	-	-	-	-	-1.00743	hypothetical protein
PRL2012_0159	-	-	-	-	-	-	-1.13251	metallophosphoesterase family protein
PRL2012_0193	-	-	-	-	-1.0537	-	-	YhgE/Pip domain-containing protein
PRL2012_0209	-	-	-	-	-	-	-1.11732	Mur ligase family protein
PRL2012_0214	-	-	-	-	1.15256	-	-	glycoside hydrolase family 127 protein
PRL2012_0217	-	-	-	-	-	-	1.7342	30S ribosomal protein S6
PRL2012_0219	1.77984	-	-	-	-	-	2.69164	30S ribosomal protein S18
PRL2012_0220	-	-	-	-	-	-	1.60618	50S ribosomal protein L9
PRL2012_0223	-	1.24767	-	-	-	-	-	metal-sensitive transcriptional regulator
PRL2012_0272	-1.09407	-	-	-	-1.3922	-	-	Rid family detoxifying hydrolase
PRL2012_0284	-	-	-	-	-	-	-1.18542	IS3 family transposase
PRL2012_0289	-	-	-	-	-	-	-1.44739	extracellular solute-binding protein
PRL2012_0294	-	-	-	-	-	-	-1.09242	TetR/AcrR family transcriptional regulator
PRL2012_0298	-	-	-	-	-1.49044	-	-	alpha-amylase
PRL2012_0299	1.33459	-	-	-	-	-	-	cation:proton antiporter
PRL2012_0308	-	-	-	-	-	-	2.47388	ATP-binding cassette domain-containing protein
PRL2012_0318	-	-	-	-	-	-	-1.05204	ribosome maturation factor RimM
PRL2012_0336	-1.06357	-	-	-	-	-	-	hypothetical protein
PRL2012_0345	-	-	-	-	-	-	1.13767	nitrate/sulfonate/bicarbonate ABC transporter ATP-binding protein
PRL2012_0346	-	-	-	-	-	-	1.12912	ABC transporter permease subunit
PRL2012_0351	-2.7281	-	-	-	-	-	-	hypothetical protein
PRL2012_0352	-2.12395	-	-1.51737	-1.35985	-	-	-	AMP-binding protein
PRL2012_0357	-1.35476	-	-	-	-1.47296	-	-1.47307	sugar ABC transporter substrate-binding protein
PRL2012_0364	-	-	-	-	1.21586	-	1.34764	Nramp family divalent metal transporter	Manganese transport protein MntH	2.A.55.3.3
PRL2012_0370	-	-	-	-	-	-	1.29611	hypothetical protein
PRL2012_0373	-	-	-	-	-	-	1.42623	glycosyltransferase	EPS
PRL2012_0374	-	-	-	-	1.29953	-	1.5885	polymerase	EPS
PRL2012_0375	-	-	-	-	1.31884	-	1.37688	polysaccharide pyruvyl transferase family protein	EPS
PRL2012_0376	-	-	-	-	1.49691	-	1.3391	flippase	EPS
PRL2012_0377	-	-	-	-	1.35845	-	1.05345	glycosyltransferase	EPS
PRL2012_0378	-	-	-	-	1.12244	-	-	2-succinyl-5-enolpyruvyl-6-hydroxy-3-cyclohexene -1-carboxylate synthase
PRL2012_0384	-	-	-	-	-	-	-1.24159	IS3 family transposase
PRL2012_0390	-	-	-	-	-	-	-1.08587	IS3 family transposase
PRL2012_0422	-	-	-	-	-	-	1.29287	DNA-directed RNA polymerase subunit beta
PRL2012_0427	-	-	-	-	-1.3331	-	-1.66658	serine/threonine protein kinase
PRL2012_0445	-	-	-	-	-	-	1.26994	amino acid ABC transporter permease
PRL2012_0453	-1.2127	-	-	-	-	-	-	sugar ABC transporter substrate-binding protein
PRL2012_0461	-	-	-	-	-1.30041	-	-	pyridoxal-phosphate dependent enzyme
PRL2012_0464	-	-	-	-	-	-	1.36975	S-ribosylhomocysteine lyase
PRL2012_0466	-	-	-	-	-	-	1.20575	amino acid permease	Amino acid transporter, PotE	2.A.3.3.22
PRL2012_0470	-	-	-	-	-	-	1.57539	pyridoxal 5'-phosphate synthase lyase subunit PdxS
PRL2012_0474	-	-	-	-	-1.01551	-	-	hypothetical protein
PRL2012_0497	-1.52402	-	-1.04547	-	-	-	-	transcriptional repressor
PRL2012_0500	-1.38709	-	-	-	-	-	-	zinc ABC transporter substrate-binding protein
PRL2012_0520	1.02105	-	-	-	-	-	1.57748	30S ribosomal protein S12
PRL2012_0521	-	-	-	-	-	-	1.28865	30S ribosomal protein S7
PRL2012_0529	-	-	-	-	-	-	1.24552	CrcB family protein
PRL2012_0539	-	-	-	-	-	-	-1.16861	sugar O-acetyltransferase
PRL2012_0547	-	-	-	-	-	-	-1.08056	IS3 family transposase
PRL2012_0550	-	-	-	-	-	-	-1.12676	ABC transporter ATP-binding protein
PRL2012_0551	-	-	-	-	-	-	1.11235	elongation factor P
PRL2012_0567	-1.02482	-	-	-	-	-	-	patatin family protein
PRL2012_0570	-	-	-	-	-	-	1.85074	vitamin K epoxide reductase family protein
PRL2012_0593	-	-	-	-	-	-	1.34456	type I glutamate--ammonia ligase
PRL2012_0602	1.07897	-	-	-	-	-	1.56473	phenylalanine--tRNA ligase subunit alpha
PRL2012_0607	-	-	-	-	-	-	1.40188	acetylglutamate kinase
PRL2012_0611	-	-	-	-	-	-	2.06918	argininosuccinate synthase
PRL2012_0614	-1.60386	-	-	-	-	-	-	Txe/YoeB family addiction module toxin
PRL2012_0615	-1.30393	-	-	-	-	-	-	type II toxin-antitoxin system RelB/DinJ family antitoxin
PRL2012_0621	-	-	-	-	-	-	1.29094	HD domain-containing protein
PRL2012_0628	-	-	-	-	1.01541	-	-	TlyA family RNA methyltransferase
PRL2012_0663	-1.05243	-	-	-	-	-	-	WhiB family transcriptional regulator
PRL2012_0674	-	-	-	-	-	-	-1.14051	1,4-alpha-glucan branching protein GlgB
PRL2012_0693	-1.02008	-	-	-	-	-	-	helix-turn-helix domain-containing protein
PRL2012_0709	1.72433	-	-	-	-	-	1.51994	IS3 family transposase
PRL2012_0711	2.55404	-	-	-	-	-	4.20964	IS21 family transposase
PRL2012_0723	-	-	-	-	-1.19348	-	1.23643	ABC transporter substrate-binding protein	L-Methionine uptake	3.A.1.24.4
PRL2012_0724	-	-	-	-	-	-	1.11123	methionine ABC transporter ATP-binding protein	L-Methionine uptake	3.A.1.24.4
PRL2012_0736	-	-	-	-	-	-	1.03109	ATP-dependent Clp protease proteolytic subunit
PRL2012_0751	1.85319	-	-	-	-1.49406	-	1.43369	ABC transporter ATP-binding protein
PRL2012_0752	2.23291	-	-	-	-	-	1.51268	FtsX-like permease family protein
PRL2012_0775	2.23171	-	-	-	-	-	-1.28861	MFS transporter
PRL2012_0776	1.04388	-	-	-	-	-	-	TetR/AcrR family transcriptional regulator
PRL2012_0780	2.71337	-	-	-	-	-	3.68051	glycogen/starch/alpha-glucan phosphorylase
PRL2012_0785	-	-	-	-	1.14951	-	-	D-hexose-6-phosphate mutarotase
PRL2012_0810	-	-	-	-	-	-	1.02844	Type 1 glutamine amidotransferase-like domain-containing protein
PRL2012_0825	-	-	-	-	-	-	1.13864	SdpI family protein
PRL2012_0832	-	-	-	-	-	-	1.00697	alanine--tRNA ligase
PRL2012_0833	-	-	-	-	-	-	1.33693	Holliday junction resolvase RuvX
PRL2012_0867	-1.02108	-	-	-	-	-	1.78128	hypothetical protein
PRL2012_0893	-	-	-	-	-	-	1.14534	choloylglycine hydrolase
PRL2012_0927	-	-	-	-	-	-	1.62486	DeoR family transcriptional regulator
PRL2012_0928	-	-	-	-	-	-	1.0356	molecular chaperone DnaJ
PRL2012_0931	-	-	-	-	-	-	1.28093	PAC2 family protein
PRL2012_0945	-	-	-	-	-	-	1.01884	aquaporin
PRL2012_0948	-	-	-	-	-	-	-1.3067	HAD family hydrolase
PRL2012_0961	-	-	-	-	-	-	1.00062	hypothetical protein
PRL2012_0969	-	-	-	-	-1.07763	-	-	tryptophan synthase subunit beta
PRL2012_0974	1.46157	-	-	-	-	-	1.87089	VanZ family protein
PRL2012_0986	-	-	-	-	-	-	1.02416	hypothetical protein
PRL2012_0988	-	-	-	-	-	-	1.04851	helix-turn-helix transcriptional regulator
PRL2012_0994	-	-	-	-	-	-	1.0332	type 1 glutamine amidotransferase
PRL2012_1020	-	-	-	-	-	-	2.06878	two-component sensor histidine kinase
PRL2012_1032	-	-	-	-	-	-	1.08637	magnesium transporter CorA family protein
PRL2012_1067	-1.30209	-	-	-	-	-	-	hypothetical protein
PRL2012_1068	-1.27908	-	-	-	-	-	-	helix-turn-helix transcriptional regulator
PRL2012_1087	-	-	-	-	-	-	-1.30215	FIVAR domain-containing protein
PRL2012_1115	-	-	-	-	-	-	1.05986	type IIA DNA topoisomerase subunit B
PRL2012_1137	-	-	-	-	-	-	1.22926	Bax inhibitor-1 family protein
PRL2012_1158	-	-	-	-	-	-	1.25858	translational GTPase TypA
PRL2012_1159	-	-	-	-	-1.76778	-	-1.89713	PadR family transcriptional regulator
PRL2012_1160	1.35712	-	-	-	-	-	-1.17463	ABC transporter ATP-binding protein
PRL2012_1161	1.2891	-	-	-	-	-	-	FtsX-like permease family protein
PRL2012_1173	-	-	-	-	-	-	1.26807	50S ribosomal protein L20
PRL2012_1194	-	-	-	-	1.20903	-	-	N-acetylglucosamine-6-phosphate deacetylase
PRL2012_1197	-	-	-	-	1.08754	-	-	ROK family protein
PRL2012_1199	-1.02558	-	-	-	-	-	-	carbohydrate kinase
PRL2012_1200	-	-	-	-	-	-	1.60225	MFS transporter	The putative fructose porter	2.A.1.7.17
PRL2012_1227	-	-	-	-	1.03485	-	-	bifunctional 1-(5-phosphoribosyl)-5-((5-phosphoribosylamino)methylidene amino)imidazole-4-carboxamide isomerase/phosphoribosylanthranilate isomerase PriA
PRL2012_1234	-1.18014	-	-	-	-	-	-	aldo/keto reductase
PRL2012_1240	-	-	-	-	-	-	-1.1267	oleate hydratase
PRL2012_1252	-	-	-	-	-	-	1.06922	glycine--tRNA ligase
PRL2012_1265	-	-	-	-	-	-	-1.25514	GH32 C-terminal domain-containing protein
PRL2012_1276	-	-	-	-	-	-	-1.67142	histidine kinase
PRL2012_1298	-	-	-	-	-	-	1.12227	ATP-dependent Clp protease ATP-binding subunit
PRL2012_1306	-	-	-	-	-	-	1.09367	chaperonin GroEL
PRL2012_1339	-	-	-	-	-	-	1.90945	DNA-directed RNA polymerase subunit omega
PRL2012_1350	-	-	-	-	-	-	1.23845	ABC transporter permease
PRL2012_1354	-	-	-	-	-2.28665	-	-1.63693	ribokinase
PRL2012_1355	-	-	-	-	-1.98442	-	-1.60758	C4-dicarboxylate transporter DcuC
PRL2012_1356	-	-	-	-	-1.86294	-	-1.61104	ribonucleoside hydrolase RihC
PRL2012_1357	-	-	-	-	-1.41101	-	-1.2088	GNAT family N-acetyltransferase
PRL2012_1400	-	-	-	-	-	-	1.05374	ABC transporter ATP-binding protein	The branched chain hydrophobic amino acid transporter	3.A.1.4.10
PRL2012_1403	-	-	-	-	-	-	1.04074	ABC transporter substrate-binding protein	The branched chain hydrophobic amino acid transporter	3.A.1.4.10
PRL2012_1406	-	-	-	-	-	-	1.35343	50S ribosomal protein L31
PRL2012_1414	-	-	-	-	-	-	1.35085	energy-dependent translational throttle protein EttA
PRL2012_1430	-	-	-	-	-	-	1.02066	class I SAM-dependent methyltransferase
PRL2012_1460	-	-	-	-	-	-	1.19456	ATP-dependent helicase
PRL2012_1478	-	-	-	-	-	-	-1.38969	glycoside-pentoside-hexuronide (GPH):cation symporter
PRL2012_1481	-1.07315	-	-	-	-	-	-	IS30 family transposase
PRL2012_1482	-1.35404	-	-	-	-	-	-	sugar ABC transporter substrate-binding protein
PRL2012_1485	-1.04032	-	-	-	-	-	-	IS3 family transposase
PRL2012_1525	-1.25434	-	-1.20297	-	-	-	-	Rrf2 family transcriptional regulator
PRL2012_1534	-	-	-	-	-	-	1.26679	30S ribosome-binding factor RbfA
PRL2012_1538	-	-	-	-	-	-	-1.09648	substrate-binding domain-containing protein
PRL2012_1550	-	-	-	-	1.42802	-	-	50S ribosomal protein L15
PRL2012_1552	-	-	-	-	1.04634	-	-	30S ribosomal protein S5
PRL2012_1553	-	-	-	-	-	-	1.11176	50S ribosomal protein L18
PRL2012_1556	1.08529	-	-	-	-	-	1.7378	type Z 30S ribosomal protein S14
PRL2012_1559	-	-	-	-	-	-	1.48715	50S ribosomal protein L14
PRL2012_1561	-	-	-	-	1.08281	-	-	50S ribosomal protein L29
PRL2012_1562	-	-	-	-	1.28573	-	-	50S ribosomal protein L16
PRL2012_1563	-	-	-	-	1.08034	-	-	30S ribosomal protein S3
PRL2012_1564	-	-	-	-	-	-	1.31153	50S ribosomal protein L22
PRL2012_1565	-	-	-	-	-	-	1.04809	30S ribosomal protein S19
PRL2012_1566	-	-	-	-	1.03705	-	-	50S ribosomal protein L2
PRL2012_1567	-	-	-	-	-	-	1.10684	50S ribosomal protein L23
PRL2012_1570	-	-	-	-	-	-	1.26762	30S ribosomal protein S10
PRL2012_1573	-	-1.11757	-	-	-	-	-	bifunctional acetaldehyde-CoA/alcohol dehydrogenase
PRL2012_1580	-2.33887	-	-	-	-	-	-	zinc-dependent alcohol dehydrogenase family protein
PRL2012_1594	-1.21464	-	-	-	2.7936	-	1.95493	hypothetical protein
PRL2012_1596	-	1.06482	-	-	1.12441	-	-	IS607 family element RNA-guided endonuclease TnpB
PRL2012_1601	-	-	-	-	-	-	1.24163	ferredoxin family protein
PRL2012_1604	-	-	-	-	-	-	1.98475	50S ribosomal protein L33
PRL2012_1605	-	-	-	-	-	-	1.77804	co-chaperone GroES
PRL2012_1614	-	-	-	-	1.41627	-	-	50S ribosomal protein L7/L12
PRL2012_1618	-	-	-	-	-	-	1.14377	phosphate ABC transporter ATP-binding protein PstB
PRL2012_1637	-	-	-	-	-	-	1.19852	50S ribosomal protein L28
PRL2012_1649	-	-	-1.22473	-	-	-	-	Acyl transferase domain-containing protein
PRL2012_1650	-1.15081	-	-1.42126	-	-	-	-	acyl-CoA carboxylase subunit beta
PRL2012_1651	-1.35845	-	-1.53115	-1.20852	-	-	-	ATP-grasp domain-containing protein
PRL2012_1652	-1.28485	-	-2.01031	-1.49024	-	-	-	biotin transporter BioY
PRL2012_1656	-	-	-	-	-	-	1.133	50S ribosomal protein L1
PRL2012_1657	-	-	-	-	-	-	1.06499	50S ribosomal protein L11
PRL2012_1673	-1.06423	-	-	-	-	-	-	SDR family oxidoreductase
PRL2012_1676	2.81117	-	1.08639	-	-	-	1.26278	ABC transporter permease
PRL2012_1677	2.47073	-	-	-	-1.30355	-	1.06859	ATP-binding cassette domain-containing protein
PRL2012_1678	-	-	-	-	-	-	1.55221	hypothetical protein
PRL2012_1700	-	-	-	-	-1.1517	-	-	3-isopropylmalate dehydratase large subunit
PRL2012_1702	-	-	-	-	-	-	-1.06698	metallophosphoesterase
PRL2012_1705	-	-	-	-	-	-	-1.15278	thymidine phosphorylase
PRL2012_1718	-	-	-	-	-	-	1.35612	NAD(P)-binding protein
PRL2012_1723	-	-	-	-	-	-	3.84717	SIS domain-containing protein
PRL2012_1724	-	-	-	-	-	-	4.51376	ABC transporter permease	Rhamnose porter ABC transporter	3.A.1.2.9
PRL2012_1725	-	-	-	-	-	-	5.11228	ABC transporter permease	Rhamnose porter ABC transporter	3.A.1.2.9
PRL2012_1726	-	1.17874	-	-	-	-	5.06066	sugar ABC transporter ATP-binding protein	Rhamnose porter ABC transporter	3.A.1.2.9
PRL2012_1727	-	-	-	-	-	-	4.7787	substrate-binding domain-containing protein	Rhamnose porter ABC transporter	3.A.1.2.9
PRL2012_1728	-	-	-	-	-	-	3.81988	xylulose kinase
PRL2012_1760	-	-	-1.26539	-	-	-	1.51735	ABC transporter family substrate-binding protein	The glutathione transporter	3.A.1.5.26
PRL2012_1761	1.38507	-	-	-	-	-	2.79729	ABC transporter ATP-binding protein	The glutathione transporter	3.A.1.5.26
PRL2012_1763	-	-	-	-	-	-	1.98988	ABC transporter permease subunit	The glutathione transporter	3.A.1.5.26
PRL2012_1764	-	-	-	-	-	-	1.03867	C1 family peptidase	The glutathione transporter	3.A.1.5.26
PRL2012_1765	-1.03225	-	-	-	-1.83083	-	-	hypothetical protein
PRL2012_1771	1.16158	-	-	-	-	-	2.55876	ABC transporter ATP-binding protein/permease	Two component multidrug efflux pump	3.A.1.135.6
PRL2012_1772	-	-	1.04197	-	-	-	2.75204	ABC transporter ATP-binding protein/permease	Two component multidrug efflux pump	3.A.1.135.6
PRL2012_1773	-	-	-	-	-	-	1.22703	MarR family transcriptional regulator
PRL2012_1774	1.07963	-	-	-	-	-	1.71632	amino acid permease
PRL2012_1779	-	-	-	-	-	-	1.2042	carbohydrate ABC transporter permease
PRL2012_1780	-1.30491	-	-	-	-	-	1.01724	ABC transporter permease subunit
PRL2012_1785	-1.26055	-	-	-	-	-	-	nitroreductase family protein
PRL2012_1791	-	-	-	-	-	-	-1.17981	alpha-glucosidase
PRL2012_1792	-	-	-	-	-1.2037	-	-	alpha-galactosidase
PRL2012_1794	1.25704	-	-	-	-	-	-	carbohydrate ABC transporter permease	α-glucoside uptake permease	3.A.1.1.42
PRL2012_1795	1.40513	-	-	-	-1.20668	-	-	sugar ABC transporter permease	α-glucoside uptake permease	3.A.1.1.42
PRL2012_1796	-	-	-	-	-1.35648	-	-	ABC transporter substrate-binding protein	α-glucoside uptake permease	3.A.1.1.42
PRL2012_1801	-	-1.20112	-	-	-	-	-1.45639	carbohydrate ABC transporter permease
PRL2012_1803	-	-	-	-	-	-	-1.24245	extracellular solute-binding protein
PRL2012_1805	-	-	-	-	-	-	-1.51369	alpha-galactosidase
PRL2012_1811	-	-	-	-	-	-	1.18769	dCTP deaminase
PRL2012_1823	-	-	-	-	-	-	2.48787	IS3 family transposase
PRL2012_1833	-	-	-	-	-	-	1.02612	PTS ascorbate transporter subunit IIC	PTS L-Ascorbate (L-Asc) Family	4.A.7.1.2
PRL2012_1834	-	-	-	-	-	-	1.31027	PTS sugar transporter subunit IIB	PTS L-Ascorbate (L-Asc) Family	4.A.7.1.2
PRL2012_1835	-	-	-	-	-	-	1.01293	PTS sugar transporter subunit IIA	PTS L-Ascorbate (L-Asc) Family	4.A.7.1.2
PRL2012_1836	1.10822	1.22614	-	-	1.43362	-	-	glycosyltransferase family 2 protein
PRL2012_1837	-	1.10344	-	-	1.04846	-	-	class 1b ribonucleoside-diphosphate reductase subunit beta
PRL2012_1838	-	1.00078	-	-	-	-	-	hypothetical protein
PRL2012_1846	-	-	-	-	-	-	-1.097	16S rRNA (adenine(1518)-N(6)/adenine(1519)-N(6))-dimethyltransferas e RsmA
PRL2012_1851	-	-	-	-	-	-	-1.08476	hypothetical protein
PRL2012_1859	-	1.07858	-	-	-	-	-	ribonuclease P protein component

## Sheet: Table S5
Table S5. Viability of B. breve PRL2012 when exposed to human gastrointestinal challenges.
	Viable* PRL2012 cells	Non-viable* PRL2012 cells
2% NaCl	59.85%	40.15%
6% NaCl	15.75%	84.25%
10% NaCl	13.21%	86.79%
0.5% Bile salts	42.58%	57.42%
1% Bile salts	58.57%	41.43%
2% Bile salts	52.02%	47.98%
pH 2.0	14.87%	85.13%
pH 3.0	15.27%	84.73%
pH 4.0	16.26%	83.74%
*Data are expressed as the average of the obtained triplicates.
